# Supplementary material
Source: publisher site journal article supplement (https://www.dovepress.com/article/335666)
Supplement: Supplementary file 1 [file get_supplementary_file.php]

**Supplemental data**

# Comparative analysis of serum proteins between hepatitis B virus genotype B and C infection by DIA-based quantitative proteomics

Yunqing Chen1,2

Dahai Wei1,2,3

Min Deng1,2,3

1Department of Infectious Diseases, Affiliated Hospital of Jiaxing University, Jiaxing, China;

2Department of Infectious Diseases, First Hospital of Jiaxing, Jiaxing, China;

3Institute of Hepatology, Affiliated Hospital of Jiaxing University, Jiaxing, China.

Correspondence: Dahai Wei and Min Deng

Department of Infectious Diseases, The Affiliated Hospital of Jiaxing University, 1882 South Zhonghuan Road, 314001, Jiaxing, China.

Tel +86-573-89975669

Fax +86-573-89975669

Email weidahai3166@hotmail.com, milixiaozhu@163.com

**Supplemental Figures:**


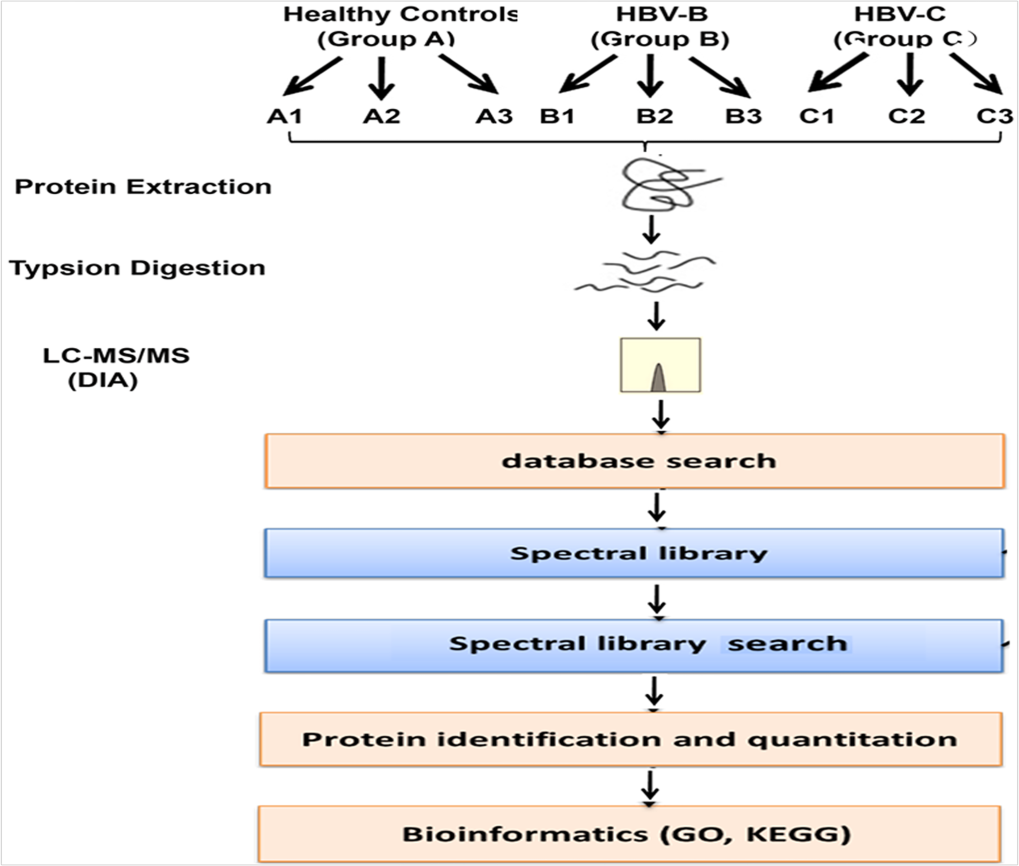


Figure S1 Overall technical route of this project.


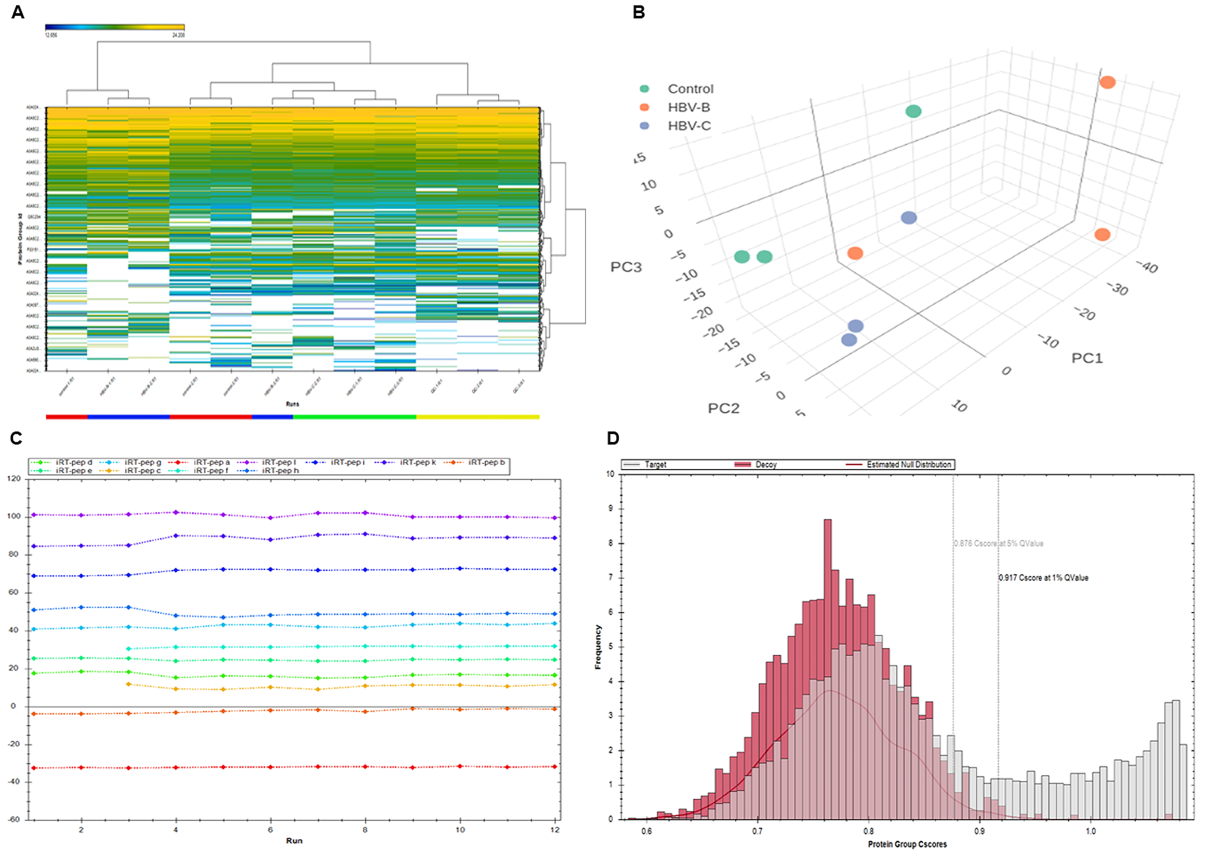


Figure S2 The qualities of the proteome dataset. (A) Quantitative heatmap of DIA. (B) Scores of Principle Component Ananlysis (PCA). (C) Chart of iRT elution time. (D) Protein scores of FDR.


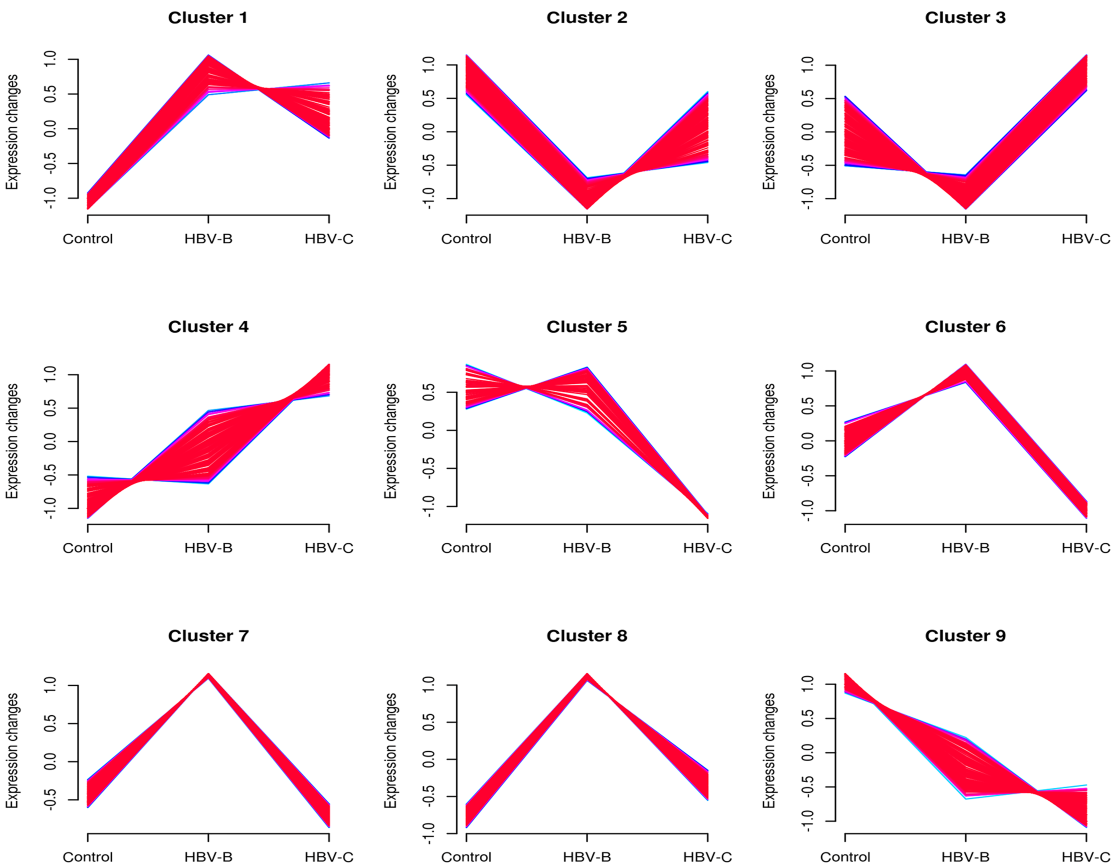


Figure S3 The protein expression changes of three groups in nine clusters [based on trend analysis](http://www.baidu.com/link?url=TPtgkCkeJCecDTKNHM8U13EpBIsLdojml1U_a3Zky7DUthQ0WCWPKf70VhoNp7NIlkg0WSbw1fh3Eevk7gihlkR49vnJ65GkPRXdAHJp7qvWYHLzlBM4KlBUQ6U2gI1PfTmYKEW_KvmRw_fhK564v_zdqfjlCtI3w0AeWrKzOIQy-DnrtEbyRGXrror-WzdGjaaf3Hnba4o45cow2ChrVtcGoSwALUSxYmEkfCisx3lJbsjRMAMUyU48ExGBtR5IjRZZlM6GVUEZfnnra0LfCXakbvMQq5H6b5fzvBPsRmNjfPCMiksX1xRDqqP8Il7H).


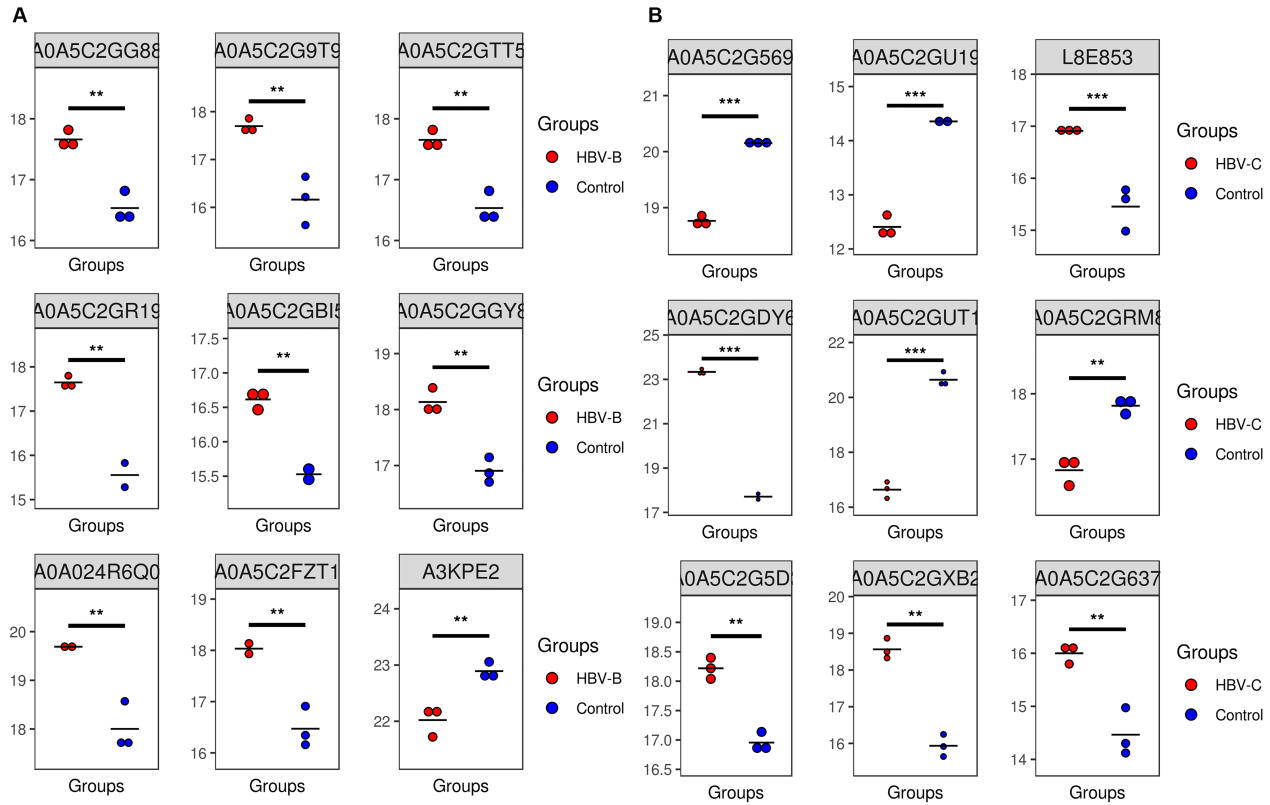


Figure S4 Boxplots of the typically differentially expressed proteins between the serum samples of the healthy controls and those of HBV genotype B infected patients (A), and between the serum samples of the healthy controls and those of HBV genotype C infected patients (B).

| **Table S1 Differentially expressed proteins between the serum samples of the healthy controls and those of HBV genotype B infected patients** | | | | | |
| --- | --- | --- | --- | --- | --- |
| **Protein accession** | **Protein description** | **Gene name** | **Sequence Number** | **B/A Ratio** | **P value** |
| Q65ZC9 | Single-chain Fv (Fragment) | scFv | 1 | 13.90 | 0.01 |
| A0A5C2G271 | IGL c1567_light_IGLV2-8_IGLJ2 (Fragment) |  | 1 | 11.61 | 0.04 |
| P35527 | Keratin, type I cytoskeletal 9 | KRT9 | 9 | 11.41 | 0.02 |
| A0A1W2PQB1 | Fc of IgG low affinity IIIa receptor isoform 1 | FCGR3A | 5 | 7.74 | 0.03 |
| A0A5C2GWN2 | IG c1232_light_IGKV4-1_IGKJ1 (Fragment) |  | 5 | 7.41 | 0.04 |
| A0A5C2GYC3 | IG c1742_light_IGKV1-5_IGKJ2 (Fragment) |  | 1 | 7.10 | 0.01 |
| A0A5C2FTB2 | IGL c59_light_IGLV1-40_IGLJ3 (Fragment) |  | 1 | 6.00 | 0.01 |
| A0A5C2G3H6 | IGL c3474_light_IGKV4-1_IGKJ2 (Fragment) |  | 1 | 5.67 | 0.01 |
| A0A5C2G9F8 | IGH + IGL c333_heavy_IGHV3-15_IGHD3-16_IGHJ4 (Fragment) |  | 2 | 5.01 | 0.04 |
| A0A0G2JS06 | Immunoglobulin lambda variable 5-39 | IGLV5-39 | 3 | 4.65 | 0.01 |
| A0A5C2FX62 | IGL c1442_light_IGKV1-12_IGKJ4 (Fragment) |  | 2 | 4.54 | 0.02 |
| A0A5C2GAY9 | IGH c395_heavy__IGHV3-7_IGHD1-14_IGHJ4 (Fragment) |  | 1 | 4.44 | 0.04 |
| A0A5C2FTG3 | IGL c248_light_IGKV1D-33_IGKJ3 (Fragment) |  | 1 | 4.29 | 0.01 |
| A0A140VJR2 | Testicular tissue protein Li 138 |  | 4 | 4.27 | 0.04 |
| A0A5C2GR19 | IG c1836_heavy_IGHV4-59_IGHD3-9_IGHJ4 (Fragment) |  | 1 | 4.21 | 0.00 |
| A0A5C2GIB0 | IG c739_light_IGKV4-1_IGKJ4 (Fragment) |  | 2 | 4.06 | 0.01 |
| Q5CZ94 | Uncharacterized protein DKFZp781M0386 | DKFZp781M0386 | 1 | 3.85 | 0.02 |
| S6B2B0 | IgG L chain |  | 1 | 3.73 | 0.02 |
| A0A5C2GFQ5 | IG c28_heavy_IGHV4-39_IGHD3-16_IGHJ5 (Fragment) |  | 1 | 3.72 | 0.01 |
| A0A5C2GMF1 | IG c300_light_IGLV1-47_IGLJ3 (Fragment) |  | 2 | 3.47 | 0.02 |
| A0A5C2GNL8 | IG c1073_heavy_IGHV3-23_IGHD6-19_IGHJ4 (Fragment) |  | 3 | 3.43 | 0.04 |
| A0A5C2G3G3 | IGL c3150_light_IGLV1-40_IGLJ1 (Fragment) |  | 1 | 3.29 | 0.02 |
| A0A5C2FW50 | IGL c416_light_IGKV1D-39_IGKJ2 (Fragment) |  | 4 | 3.28 | 0.02 |
| A0A024R6Q0 | HCG2029544, isoform CRA_a (Fragment) | hCG_2029544 | 1 | 3.10 | 0.00 |
| A0A5C2G844 | IGL c3937_light_IGKV1D-13_IGKJ4 (Fragment) |  | 2 | 3.03 | 0.02 |
| A0A0C4DH63 | T cell receptor gamma joining P (Fragment) | TRGJP | 2 | 2.95 | 0.02 |
| A0A5C2FZT1 | IGL c1175_light_IGKV3-20_IGKJ1 (Fragment) |  | 1 | 2.89 | 0.01 |
| A0A5C2FTV2 | IGL c142_light_IGKV1-9_IGKJ4 (Fragment) |  | 1 | 2.81 | 0.02 |
| A0A5C2G9T9 | IGH + IGL c600_heavy_IGHV3-23_IGHD3-3_IGHJ3 (Fragment) |  | 1 | 2.79 | 0.00 |
| E5RH81 | Carbonic anhydrase 1 (Fragment) | CA1 | 4 | 2.61 | 0.05 |
| A0A5C2GKC3 | IG c1254_light_IGLV6-57_IGLJ2 (Fragment) |  | 1 | 2.50 | 0.02 |
| A0A5C2G0F4 | IGL c2659_light_IGKV1D-16_IGKJ5 (Fragment) |  | 2 | 2.48 | 0.02 |
| A0A5C2G6C5 | IGL c3197_light_IGKV2D-29_IGKJ4 (Fragment) |  | 2 | 2.47 | 0.02 |
| A0A5C2G0B7 | IGL c1846_light_IGLV1-40_IGLJ2 (Fragment) |  | 1 | 2.45 | 0.03 |
| P15814 | Immunoglobulin lambda-like polypeptide 1 | IGLL1 | 5 | 2.45 | 0.01 |
| A0A5C2GGY8 | IGH + IGL c451_light_IGLV1-51_IGLJ2 (Fragment) |  | 2 | 2.34 | 0.00 |
| A0A5C2G310 | IGL c2856_light_IGKV3-20_IGKJ2 (Fragment) |  | 1 | 2.28 | 0.01 |
| A0A5C2GG88 | IG c54_heavy_IGHV3-23_IGHD3-22_IGHJ4 (Fragment) |  | 1 | 2.17 | 0.00 |
| A0A5C2FWX9 | IGL c1459_light_IGKV1-33_IGKJ3 (Fragment) |  | 1 | 2.16 | 0.02 |
| A0A5C2GTT5 | IG c911_heavy_IGHV3-23_IGHD1-7_IGHJ3 (Fragment) |  | 1 | 2.16 | 0.00 |
| A0A5C2GBI5 | IGL c71_light_IGLV3-21_IGLJ1 (Fragment) |  | 2 | 2.13 | 0.00 |
| A0A5C2GBS4 | IGH + IGL c88_light_IGKV3-20_IGKJ4 (Fragment) |  | 2 | 2.12 | 0.02 |
| A0A5C2GW97 | IG c1112_light_IGKV1-5_IGKJ1 (Fragment) |  | 1 | 2.01 | 0.02 |
| A0A5C2GZJ6 | IG c136_light_IGKV3-20_IGKJ2 (Fragment) |  | 1 | 1.91 | 0.04 |
| A0A5C2FWS8 | IGL c365_light_IGKV1D-39_IGKJ2 (Fragment) |  | 2 | 1.78 | 0.01 |
| A3KPE2 | Apolipoprotein C-III, isoform CRA_a | APOC3 | 10 | 0.55 | 0.01 |
| A0A5C2G2U5 | IGL c2275_light_IGKV3-15_IGKJ1 (Fragment) |  | 2 | 0.43 | 0.03 |
| A0A5C2G6K7 | IGH c600_heavy__IGHV2-70_IGHD5-24_IGHJ4 (Fragment) |  | 1 | 0.39 | 0.02 |
| P05546 | Heparin cofactor 2 | SERPIND1 | 40 | 0.34 | 0.05 |
| P48740 | Mannan-binding lectin serine protease 1 | MASP1 | 7 | 0.34 | 0.05 |
| A0A1B1CYC5 | Vitamin D binding protein (Fragment) | Gc | 4 | 0.24 | 0.03 |
| A0A1B0GTC3 | Alpha-ketoglutarate-dependent dioxygenase FTO | FTO | 2 | 0.21 | 0.02 |
| A8K9P0 | cDNA FLJ78413, highly similar to Homo sapiens albumin, mRNA |  | 2 | 0.13 | 0.05 |
| A0A5C2FW10 | IGL c1201_light_IGKV1D-39_IGKJ5 (Fragment) |  | 1 | 1.43 | 0.03 |
| P02763 | Alpha-1-acid glycoprotein 1 | ORM1 | 24 | 0.70 | 0.02 |
| A0A024CIM4 | Carboxylic ester hydrolase |  | 9 | 0.88 | 0.44 |
| A0A024R035 | Complement component 9, isoform CRA_a | C9 | 45 | 0.69 | 0.32 |
| A0A024R0T8 | Apolipoprotein C-I, isoform CRA_a | APOC1 | 10 | 0.64 | 0.53 |
| A0A024R145 | Fructose-bisphosphate aldolase | ALDOB | 12 | 0.52 | 0.37 |
| A0A024R1G8 | Apolipoprotein L, 1, isoform CRA_b | APOL1 | 27 | 0.67 | 0.28 |
| A0A024R2Q7 | C-type lectin domain family 3, member B, isoform CRA_a | CLEC3B | 14 | 1.58 | 0.36 |
| A0A024R319 | Laminin, beta 2 (Laminin S), isoform CRA_a | LAMB2 | 3 | 0.88 | 0.87 |
| A0A024R3E3 | Apolipoprotein A-I, isoform CRA_a | APOA1 | 101 | 0.96 | 0.85 |
| A0A024R3I5 | Melanoma cell adhesion molecule, isoform CRA_a | MCAM | 2 | 1.17 | 0.53 |
| A0A024R462 | Fibronectin 1, isoform CRA_n | FN1 | 158 | 0.50 | 0.09 |
| A0A024R483 | Uncharacterized protein | MGC99813 | 4 | 2.05 | 0.62 |
| A0A024R6I6 | Serpin peptidase inhibitor, clade A (Alpha-1 antiproteinase, antitrypsin), member 10, isoform CRA_b | SERPINA10 | 6 | 0.81 | 0.77 |
| A0A024R6I9 | Serpin peptidase inhibitor, clade A (Alpha-1 antiproteinase, antitrypsin), member 4, isoform CRA_a | SERPINA4 | 41 | 0.55 | 0.21 |
| A0A024R6P0 | Serpin peptidase inhibitor, clade A (Alpha-1 antiproteinase, antitrypsin), member 3, isoform CRA_c | SERPINA3 | 51 | 0.68 | 0.42 |
| A0A024R860 | Carbohydrate sulfotransferase | CHST12 | 1 | 1.02 | 0.96 |
| A0A024R8G3 | Prostaglandin D2 synthase 21kDa (Brain), isoform CRA_a | PTGDS | 1 | 1.14 | 0.65 |
| A0A024R930 | Proteoglycan 4, isoform CRA_a | PRG4 | 13 | 0.81 | 0.64 |
| A0A024R944 | Serpin peptidase inhibitor, clade C (Antithrombin), member 1, isoform CRA_a | SERPINC1 | 63 | 0.59 | 0.13 |
| A0A024R962 | HCG40889, isoform CRA_b | hCG_40889 | 131 | 0.67 | 0.28 |
| A0A024R9Q1 | Thrombospondin 1, isoform CRA_a | THBS1 | 26 | 0.56 | 0.34 |
| A0A024RAA7 | Complement component 1, q subcomponent, C chain, isoform CRA_a | C1QC | 7 | 1.01 | 0.98 |
| A0A024RAB9 | Complement component 1, q subcomponent, B chain, isoform CRA_a | C1QB | 12 | 0.86 | 0.72 |
| A0A024RAE8 | Tyrosine-protein phosphatase non-receptor type | PTPN4 | 2 | 0.69 | 0.20 |
| A0A024RAG6 | Complement component 1, q subcomponent, A chain, isoform CRA_a | C1QA | 10 | 1.43 | 0.55 |
| A0A024RBS0 | RNA helicase | DDX55 | 1 | 0.72 | 0.72 |
| A0A024RDT4 | Lymphocyte cytosolic protein 1 (L-plastin), isoform CRA_a | LCP1 | 12 | 0.21 | 0.58 |
| A0A068LKQ2 | Ig heavy chain variable region (Fragment) |  | 3 | 1.43 | 0.65 |
| A0A068LKR4 | Ig heavy chain variable region (Fragment) |  | 2 | 0.96 | 0.95 |
| A0A068LN11 | Ig heavy chain variable region (Fragment) |  | 1 | 0.39 | 0.51 |
| A0A075B6I1 | Immunoglobulin lambda variable 4-60 | IGLV4-60 | 2 | 3.25 | 0.22 |
| A0A075B6I4 | Immunoglobulin lambda variable 10-54 | IGLV10-54 | 1 | 3.76 | 0.14 |
| A0A075B6J9 | Immunoglobulin lambda variable 2-18 | IGLV2-18 | 2 | 1.53 | 0.30 |
| A0A075B6R2 | Immunoglobulin heavy variable 4-4 | IGHV4-4 | 3 | 2.57 | 0.22 |
| A0A075B7D0 | Immunoglobulin heavy variable 1/OR15-1 (non-functional) (Fragment) | IGHV1OR15-1 | 2 | 1.72 | 0.33 |
| A0A087WSY5 | Carboxypeptidase B2 | CPB2 | 22 | 1.21 | 0.67 |
| A0A087WTI0 | VPS10 domain-containing receptor SorCS1 | SORCS1 | 1 | 0.59 | 0.24 |
| A0A087WUP3 | GTP-binding protein 8 | GTPBP8 | 1 | 0.61 | 0.49 |
| A0A087WWD1 | Uncharacterized zinc finger protein 814 | ZNF814 | 1 | 0.38 | 0.23 |
| A0A087WWT3 | Serum albumin | ALB | 4 | 0.41 | 0.42 |
| A0A087WXI2 | IgGFc-binding protein (Fragment) | FCGBP | 21 | 0.22 | 0.57 |
| A0A087X106 | Keratin, type II cuticular Hb1 | KRT81 | 2 | 1.51 | 0.36 |
| A0A087X1J7 | Glutathione peroxidase | GPX3 | 11 | 2.24 | 0.07 |
| A0A0A0MR13 | Guanine nucleotide-binding protein G(s) subunit alpha isoforms short | GNAS | 1 | 0.21 | 0.11 |
| A0A0A0MRJ7 | Coagulation factor V | F5 | 33 | 0.70 | 0.29 |
| A0A0A0MT36 | Immunoglobulin kappa variable 6D-21 | IGKV6D-21 | 1 | 1.39 | 0.60 |
| A0A0B4J1U3 | Immunoglobulin lambda variable 1-36 | IGLV1-36 | 1 | 2.25 | 0.10 |
| A0A0B4J1V2 | Immunoglobulin heavy variable 2-26 | IGHV2-26 | 5 | 0.65 | 0.39 |
| A0A0B4J1Y8 | Immunoglobulin lambda variable 9-49 | IGLV9-49 | 3 | 1.41 | 0.17 |
| A0A0B4J259 | Lysozyme | LYZ | 3 | 0.56 | 0.48 |
| A0A0C4DGH5 | Cullin-associated NEDD8-dissociated protein 1 (Fragment) | CAND1 | 1 | 1.28 | 0.75 |
| A0A0C4DH35 | Immunoglobulin heavy variable 3-35 (non-functional) (Fragment) | IGHV3-35 | 2 | 1.70 | 0.42 |
| A0A0C4DH68 | Immunoglobulin kappa variable 2-24 | IGKV2-24 | 5 | 1.60 | 0.42 |
| A0A0G2JMZ6 | Kinesin-like protein (Fragment) | KIF5C | 1 | 0.60 | 0.45 |
| A0A0H5AY34 | L-selectin | SELL | 7 | 2.22 | 0.13 |
| A0A0K2BMD8 | Mutant hemoglobin alpha 2 globin chain | HBA2 | 29 | 1.46 | 0.63 |
| A0A0S2Z3D5 | Apolipoprotein E isoform 1 (Fragment) | APOE | 58 | 1.14 | 0.53 |
| A0A0S2Z3Y1 | Lectin galactoside-binding soluble 3 binding protein isoform 1 (Fragment) | LGALS3BP | 12 | 0.89 | 0.67 |
| A0A0S2Z4I5 | Complement factor properdin isoform 1 (Fragment) | CFP | 13 | 0.98 | 0.96 |
| A0A0S2Z4K3 | Protein S isoform 1 (Fragment) | PROS1 | 35 | 0.51 | 0.11 |
| A0A0S2Z4Q2 | Transforming growth factor beta-induced 68kDa isoform 1 (Fragment) | TGFBI | 17 | 1.16 | 0.82 |
| A0A0X9T7T4 | MS-D3 heavy chain variable region (Fragment) |  | 2 | 1.02 | 0.97 |
| A0A0X9UWM4 | IBM-A3 heavy chain variable region (Fragment) |  | 3 | 0.64 | 0.17 |
| A0A0X9V9C4 | GCT-A8 heavy chain variable region (Fragment) |  | 3 | 1.72 | 0.33 |
| A0A109PW33 | MS-C1 light chain variable region (Fragment) |  | 2 | 1.63 | 0.42 |
| A0A109PW41 | GCT-A2 light chain variable region (Fragment) |  | 3 | 3.22 | 0.43 |
| A0A120HG44 | MS-E1 heavy chain variable region (Fragment) |  | 1 | 1.12 | 0.89 |
| A0A125QYY8 | IBM-B1 light chain variable region (Fragment) |  | 1 | 1.41 | 0.56 |
| A0A125U0V4 | GCT-A2 heavy chain variable region (Fragment) |  | 2 | 0.98 | 0.95 |
| A0A140VJI7 | Testicular tissue protein Li 61 |  | 20 | 0.82 | 0.75 |
| A0A140VK00 | Testicular tissue protein Li 227 |  | 31 | 1.70 | 0.40 |
| A0A140VK24 | Testicular secretory protein Li 24 |  | 10 | 14.72 | 0.27 |
| A0A140VKE5 | Sulfhydryl oxidase | QSCN6 | 15 | 3.19 | 0.07 |
| A0A140VKF3 | Testis tissue sperm-binding protein Li 70n |  | 34 | 0.67 | 0.43 |
| A0A182DWH7 | Selenoprotein P (Fragment) | SELENOP | 9 | 0.70 | 0.12 |
| A0A1B0GUB1 | Battenin | CLN3 | 1 | 2.41 | 0.26 |
| A0A1B0GUU9 | Immunoglobulin heavy constant mu (Fragment) | IGHM | 13 | 1.15 | 0.64 |
| A0A1C9J6R5 | B cell receptor heavy chain variable region (Fragment) |  | 2 | 0.97 | 0.97 |
| A0A1S5UZ07 | Talin-1 | TLN1 | 3 | 0.92 | 0.93 |
| A0A1U9X793 | APOM |  | 13 | 0.47 | 0.15 |
| A0A1U9X8W4 | C2 |  | 5 | 0.52 | 0.40 |
| A0A1W6IYI3 | N90-VRC38.01 heavy chain variable region (Fragment) |  | 2 | 1.85 | 0.45 |
| A0A1W6IYI5 | N90-VRC38.08 heavy chain variable region (Fragment) |  | 2 | 1.64 | 0.32 |
| A0A1W6IYI9 | N90-VRC38.04 heavy chain variable region (Fragment) |  | 1 | 1.98 | 0.54 |
| A0A1W6IYJ0 | N90-VRC38.03 heavy chain variable region (Fragment) |  | 3 | 1.33 | 0.45 |
| A0A1Z1VXF2 | CD44 protein (Fragment) | CD44 | 4 | 1.89 | 0.09 |
| A0A286YES1 | Immunoglobulin heavy constant gamma 3 (Fragment) | IGHG3 | 16 | 1.21 | 0.35 |
| A0A286YEY4 | Immunoglobulin heavy constant gamma 2 (Fragment) | IGHG2 | 30 | 1.34 | 0.49 |
| A0A2P9AMP2 | Uncharacterized protein | BQ8482_280127 | 1 | 0.64 | 0.59 |
| A0A2U8J8I9 | Ig heavy chain variable region (Fragment) | IgH | 2 | 1.03 | 0.91 |
| A0A2U8J8M6 | Ig heavy chain variable region (Fragment) | IgH | 2 | 0.95 | 0.90 |
| A0A2U8J8N6 | Ig heavy chain variable region (Fragment) | IgH | 1 | 1.65 | 0.30 |
| A0A2U8J8Q1 | Ig heavy chain variable region (Fragment) | IgH | 4 | 0.83 | 0.63 |
| A0A2U8J8Z6 | Ig heavy chain variable region (Fragment) | IgH | 2 | 3.54 | 0.17 |
| A0A2U8J942 | Ig heavy chain variable region (Fragment) | IgH | 1 | 1.04 | 0.93 |
| A0A2U8J995 | Ig heavy chain variable region (Fragment) | IgH | 1 | 1.76 | 0.33 |
| A0A2X0SG27 | NGEF (Fragment) | NGEF | 1 | 1.08 | 0.82 |
| A0A2Z4LCH4 | Corticosteroid-binding globulin |  | 18 | 0.99 | 0.99 |
| A0A384MDV8 | Epididymis secretory sperm binding protein |  | 37 | 0.88 | 0.84 |
| A0A384MEF1 | Epididymis secretory sperm binding protein |  | 86 | 0.51 | 0.15 |
| A0A384N669 | Epididymis secretory sperm binding protein |  | 19 | 0.69 | 0.34 |
| A0A384NKM6 | Apolipoprotein H (Beta-2-glycoprotein I), isoform CRA_a | APOH | 35 | 0.37 | 0.22 |
| A0A384NKS6 | Clusterin |  | 49 | 0.55 | 0.19 |
| A0A386QWI1 | Neurofascin isoform 140 | Nfasc | 2 | 4.50 | 0.49 |
| A0A3B0J0F2 | Adiponectin D | ADID | 3 | 2.06 | 0.30 |
| A0A3B3IRV3 | Malignant T-cell-amplified sequence | MCTS2P | 1 | 0.51 | 0.32 |
| A0A3B3ISR2 | Complement C1r subcomponent | C1R | 39 | 0.51 | 0.09 |
| A0A3G1HEF1 | Mutant serpin family A member 7 |  | 26 | 1.04 | 0.93 |
| A0A449C1A8 | IGHV3-20*01_S7413 (Fragment) | IGHV3-20 | 3 | 3.45 | 0.06 |
| A0A4E0W274 | AEP3B2 (Fragment) |  | 1 | 0.86 | 0.77 |
| A0A4P8J6J1 | IgG4_IGHV5-51 (Fragment) |  | 2 | 1.66 | 0.54 |
| A0A5C2FTA8 | IGL c188_light_IGKV1-39_IGKJ2 (Fragment) |  | 3 | 0.73 | 0.14 |
| A0A5C2FTI5 | IGL c2_light_IGKV1-9_IGKJ3 (Fragment) |  | 3 | 0.68 | 0.72 |
| A0A5C2FTL0 | IGL c32_light_IGKV1-12_IGKJ2 (Fragment) |  | 1 | 2.20 | 0.33 |
| A0A5C2FTM7 | IGL c52_light_IGKV2-30_IGKJ3 (Fragment) |  | 6 | 3.12 | 0.21 |
| A0A5C2FTN6 | IGL c62_light_IGLV3-21_IGLJ1 (Fragment) |  | 2 | 3.88 | 0.37 |
| A0A5C2FTS0 | IGL c381_light_IGLV2-8_IGLJ2 (Fragment) |  | 1 | 1.12 | 0.82 |
| A0A5C2FTV4 | IGL c408_light_IGKV3-20_IGKJ2 (Fragment) |  | 1 | 2.10 | 0.14 |
| A0A5C2FTX2 | IGL c24_light_IGLV2-14_IGLJ2 (Fragment) |  | 2 | 1.17 | 0.89 |
| A0A5C2FTY9 | IGL c448_light_IGKV3-20_IGKJ2 (Fragment) |  | 3 | 1.70 | 0.32 |
| A0A5C2FU05 | IGL c44_light_IGKV3-20_IGKJ2 (Fragment) |  | 8 | 2.47 | 0.20 |
| A0A5C2FU63 | IGL c282_light_IGLV1-47_IGLJ2 (Fragment) |  | 3 | 1.80 | 0.49 |
| A0A5C2FU72 | IGL c193_light_IGKV3-20_IGKJ3 (Fragment) |  | 3 | 1.61 | 0.55 |
| A0A5C2FU92 | IGL c551_light_IGLV3-25_IGLJ3 (Fragment) |  | 1 | 1.82 | 0.30 |
| A0A5C2FUC4 | IGL c352_light_IGLV1-40_IGLJ3 (Fragment) |  | 2 | 1.32 | 0.54 |
| A0A5C2FUE0 | IGL c608_light_IGKV1D-39_IGKJ2 (Fragment) |  | 2 | 0.63 | 0.40 |
| A0A5C2FUH8 | IGL c519_light_IGLV3-19_IGLJ2 (Fragment) |  | 2 | 3.47 | 0.06 |
| A0A5C2FUR3 | IGL c741_light_IGKV1-12_IGKJ4 (Fragment) |  | 1 | 4.99 | 0.09 |
| A0A5C2FUU0 | IGL c771_light_IGKV2D-28_IGKJ5 (Fragment) |  | 2 | 1.96 | 0.30 |
| A0A5C2FUV2 | IGL c444_light_IGKV1-17_IGKJ2 (Fragment) |  | 2 | 1.05 | 0.89 |
| A0A5C2FUY8 | IGL c414_light_IGKV1D-39_IGKJ1 (Fragment) |  | 3 | 1.90 | 0.26 |
| A0A5C2FV64 | IGL c56_light_IGLV1-40_IGLJ2 (Fragment) |  | 1 | 1.37 | 0.50 |
| A0A5C2FV72 | IGL c672_light_IGKV3-20_IGKJ3 (Fragment) |  | 1 | 2.31 | 0.17 |
| A0A5C2FV83 | IGL c931_light_IGLV3-19_IGLJ2 (Fragment) |  | 1 | 2.64 | 0.29 |
| A0A5C2FVD4 | IGL c742_light_IGLV2-23_IGLJ3 (Fragment) |  | 1 | 2.68 | 0.33 |
| A0A5C2FVF5 | IGL c50_light_IGKV1-5_IGKJ4 (Fragment) |  | 2 | 1.34 | 0.34 |
| A0A5C2FVG1 | IGL c889_light_IGKV2D-28_IGKJ2 (Fragment) |  | 1 | 1.77 | 0.46 |
| A0A5C2FVI2 | IGL c1041_light_IGLV2-14_IGLJ1 (Fragment) |  | 2 | 1.22 | 0.63 |
| A0A5C2FVJ7 | IGL c1078_light_IGKV1D-17_IGKJ1 (Fragment) |  | 4 | 1.43 | 0.58 |
| A0A5C2FVJ8 | IGL c196_light_IGLV2-11_IGLJ3 (Fragment) |  | 2 | 1.43 | 0.40 |
| A0A5C2FVT6 | IGL c1039_light_IGKV1-6_IGKJ2 (Fragment) |  | 1 | 1.32 | 0.23 |
| A0A5C2FVV5 | IGL c1208_light_IGKV1-16_IGKJ1 (Fragment) |  | 1 | 1.97 | 0.24 |
| A0A5C2FVW2 | IGL c1069_light_IGKV3-11_IGKJ2 (Fragment) |  | 3 | 1.00 | 1.00 |
| A0A5C2FVX9 | IGL c972_light_IGLV8-61_IGLJ3 (Fragment) |  | 6 | 3.07 | 0.24 |
| A0A5C2FVY0 | IGL c1089_light_IGLV1-40_IGLJ3 (Fragment) |  | 1 | 2.08 | 0.22 |
| A0A5C2FVZ8 | IGL c992_light_IGKV1-27_IGKJ3 (Fragment) |  | 4 | 2.99 | 0.31 |
| A0A5C2FW17 | IGL c1012_light_IGKV1-5_IGKJ1 (Fragment) |  | 2 | 0.97 | 0.97 |
| A0A5C2FW77 | IGL c1281_light_IGLV1-47_IGLJ3 (Fragment) |  | 1 | 1.53 | 0.37 |
| A0A5C2FWF1 | IGL c1418_light_IGLV1-47_IGLJ3 (Fragment) |  | 2 | 9.83 | 0.33 |
| A0A5C2FWM5 | IGL c1498_light_IGKV1D-39_IGKJ1 (Fragment) |  | 2 | 2.17 | 0.16 |
| A0A5C2FWN5 | IGL c1508_light_IGKV3-11_IGKJ4 (Fragment) |  | 1 | 1.08 | 0.91 |
| A0A5C2FWR3 | IGL c560_light_IGKV3-20_IGKJ1 (Fragment) |  | 1 | 0.76 | 0.79 |
| A0A5C2FWU1 | IGL c1501_light_IGKV3-11_IGKJ4 (Fragment) |  | 2 | 1.84 | 0.32 |
| A0A5C2FWX2 | IGL c620_light_IGLV1-44_IGLJ3 (Fragment) |  | 3 | 5.29 | 0.08 |
| A0A5C2FWY4 | IGL c1541_light_IGLV2-11_IGLJ3 (Fragment) |  | 1 | 2.88 | 0.37 |
| A0A5C2FX45 | IGL c1539_light_IGKV3-15_IGKJ1 (Fragment) |  | 1 | 0.95 | 0.95 |
| A0A5C2FX48 | IGL c806_light_IGKV1-5_IGKJ2 (Fragment) |  | 7 | 2.70 | 0.17 |
| A0A5C2FX66 | IGL c770_light_IGKV1-5_IGKJ1 (Fragment) |  | 2 | 1.49 | 0.68 |
| A0A5C2FX88 | IGL c1591_light_IGKV2-30_IGKJ4 (Fragment) |  | 1 | 1.41 | 0.84 |
| A0A5C2FXB2 | IGL c235_light_IGLV3-1_IGLJ3 (Fragment) |  | 2 | 2.06 | 0.21 |
| A0A5C2FXC1 | IGL c830_light_IGLV3-9_IGLJ2 (Fragment) |  | 7 | 1.88 | 0.19 |
| A0A5C2FXH1 | IGL c295_light_IGKV1-12_IGKJ4 (Fragment) |  | 2 | 1.36 | 0.26 |
| A0A5C2FXL7 | IGL c1325_light_IGLV1-44_IGLJ2 (Fragment) |  | 1 | 0.64 | 0.12 |
| A0A5C2FXM8 | IGL c1758_light_IGLV2-14_IGLJ2 (Fragment) |  | 3 | 2.66 | 0.29 |
| A0A5C2FXQ9 | IGL c1719_light_IGKV1-27_IGKJ2 (Fragment) |  | 1 | 1.79 | 0.49 |
| A0A5C2FXR4 | IGL c1729_light_IGKV1D-39_IGKJ1 (Fragment) |  | 1 | 1.91 | 0.19 |
| A0A5C2FXS5 | IGL c1682_light_IGKV1-12_IGKJ1 (Fragment) |  | 1 | 2.00 | 0.16 |
| A0A5C2FXT8 | IGL c1454_light_IGKV1D-39_IGKJ1 (Fragment) |  | 3 | 4.62 | 0.07 |
| A0A5C2FXY6 | IGL c1752_light_IGKV1D-13_IGKJ4 (Fragment) |  | 2 | 1.88 | 0.21 |
| A0A5C2FXZ8 | IGL c1524_light_IGKV4-1_IGKJ1 (Fragment) |  | 4 | 1.09 | 0.80 |
| A0A5C2FY51 | IGL c1096_light_IGLV6-57_IGLJ2 (Fragment) |  | 1 | 1.83 | 0.19 |
| A0A5C2FY75 | IGL c1842_light_IGKV1D-43_IGKJ1 (Fragment) |  | 3 | 1.87 | 0.31 |
| A0A5C2FYC1 | IGL c1166_light_IGKV3-20_IGKJ2 (Fragment) |  | 1 | 0.47 | 0.43 |
| A0A5C2FYC9 | IGL c1902_light_IGKV2-30_IGKJ1 (Fragment) |  | 1 | 16.52 | 0.15 |
| A0A5C2FYG2 | IGL c1959_light_IGKV4-1_IGKJ1 (Fragment) |  | 1 | 1.70 | 0.47 |
| A0A5C2FYH6 | IGL c2011_light_IGKV1D-33_IGKJ4 (Fragment) |  | 6 | 1.76 | 0.22 |
| A0A5C2FYI0 | IGL c1290_light_IGKV1-5_IGKJ1 (Fragment) |  | 2 | 0.85 | 0.81 |
| A0A5C2FYI5 | IGL c1714_light_IGKV6-21_IGKJ4 (Fragment) |  | 4 | 3.55 | 0.19 |
| A0A5C2FYL2 | IGL c2002_light_IGKV1-39_IGKJ1 (Fragment) |  | 5 | 1.10 | 0.89 |
| A0A5C2FYL9 | IGL c745_light_IGLV1-36_IGLJ3 (Fragment) |  | 2 | 1.02 | 0.95 |
| A0A5C2FYM3 | IGL c2071_light_IGKV4-1_IGKJ1 (Fragment) |  | 1 | 2.99 | 0.11 |
| A0A5C2FYN0 | IGL c367_light_IGLV1-44_IGLJ3 (Fragment) |  | 2 | 1.38 | 0.22 |
| A0A5C2FYN5 | IGL c2081_light_IGKV1-17_IGKJ1 (Fragment) |  | 4 | 1.66 | 0.43 |
| A0A5C2FYS5 | IGL c2039_light_IGLV2-14_IGLJ1 (Fragment) |  | 3 | 2.19 | 0.21 |
| A0A5C2FYV6 | IGL c1854_light_IGKV4-1_IGKJ2 (Fragment) |  | 2 | 1.32 | 0.64 |
| A0A5C2FZ00 | IGL c1460_light_IGLV2-8_IGLJ3 (Fragment) |  | 3 | 1.57 | 0.44 |
| A0A5C2FZ15 | IGL c2139_light_IGKV1D-39_IGKJ4 (Fragment) |  | 3 | 0.74 | 0.69 |
| A0A5C2FZ22 | IGL c517_light_IGKV1-39_IGKJ2 (Fragment) |  | 3 | 1.72 | 0.31 |
| A0A5C2FZ23 | IGL c2278_light_IGLV6-57_IGLJ3 (Fragment) |  | 1 | 2.29 | 0.29 |
| A0A5C2FZ40 | IGL c925_light_IGLV1-40_IGLJ3 (Fragment) |  | 2 | 2.33 | 0.08 |
| A0A5C2FZ97 | IGL c1486_light_IGKV3-20_IGKJ2 (Fragment) |  | 1 | 1.53 | 0.36 |
| A0A5C2FZC1 | IGL c2311_light_IGKV3-20_IGKJ1 (Fragment) |  | 1 | 2.51 | 0.20 |
| A0A5C2FZH8 | IGL c1075_light_IGKV3-20_IGKJ5 (Fragment) |  | 1 | 1.47 | 0.47 |
| A0A5C2FZM5 | IGL c625_light_IGKV3-11_IGKJ4 (Fragment) |  | 3 | 1.61 | 0.35 |
| A0A5C2FZN1 | IGL c2478_light_IGKV1D-33_IGKJ3 (Fragment) |  | 2 | 1.56 | 0.29 |
| A0A5C2FZP6 | IGL c747_light_IGKV1-39_IGKJ2 (Fragment) |  | 2 | 1.52 | 0.19 |
| A0A5C2FZQ2 | IGL c2402_light_IGKV2-28_IGKJ4 (Fragment) |  | 4 | 2.46 | 0.36 |
| A0A5C2FZV7 | IGL c817_light_IGKV2-30_IGKJ2 (Fragment) |  | 1 | 4.37 | 0.40 |
| A0A5C2G045 | IGL c917_light_IGKV3-20_IGKJ1 (Fragment) |  | 3 | 2.08 | 0.27 |
| A0A5C2G0A0 | IGL c2589_light_IGKV4-1_IGKJ2 (Fragment) |  | 1 | 1.60 | 0.38 |
| A0A5C2G0A7 | IGL c987_light_IGKV3-11_IGKJ4 (Fragment) |  | 5 | 5.97 | 0.27 |
| A0A5C2G0B4 | IGL c2671_light_IGKV1-5_IGKJ2 (Fragment) |  | 1 | 1.95 | 0.07 |
| A0A5C2G0B9 | IGL c1395_light_IGKV3-20_IGKJ2 (Fragment) |  | 4 | 1.19 | 0.67 |
| A0A5C2G0C6 | IGL c2681_light_IGLV1-44_IGLJ3 (Fragment) |  | 2 | 1.29 | 0.66 |
| A0A5C2G0E0 | IGL c1415_light_IGKV1D-39_IGKJ2 (Fragment) |  | 1 | 1.12 | 0.79 |
| A0A5C2G0F1 | IGL c1886_light_IGKV1-12_IGKJ4 (Fragment) |  | 2 | 2.09 | 0.20 |
| A0A5C2G0F5 | IGL c2030_light_IGKV1-39_IGKJ1 (Fragment) |  | 4 | 2.19 | 0.13 |
| A0A5C2G0I0 | IGL c2070_light_IGKV3-20_IGKJ4 (Fragment) |  | 1 | 6.94 | 0.19 |
| A0A5C2G0K7 | IGL c2652_light_IGKV2D-29_IGKJ1 (Fragment) |  | 2 | 1.89 | 0.16 |
| A0A5C2G0Q5 | IGL c2120_light_IGKV4-1_IGKJ1 (Fragment) |  | 5 | 0.74 | 0.71 |
| A0A5C2G0Y8 | IGL c1137_light_IGKV1-39_IGKJ1 (Fragment) |  | 2 | 1.71 | 0.30 |
| A0A5C2G146 | IGL c2852_light_IGKV3-20_IGKJ2 (Fragment) |  | 1 | 2.29 | 0.13 |
| A0A5C2G173 | IGL c2300_light_IGKV1D-13_IGKJ4 (Fragment) |  | 1 | 2.49 | 0.14 |
| A0A5C2G176 | IGL c1227_light_IGKV3-11_IGKJ3 (Fragment) |  | 1 | 0.46 | 0.42 |
| A0A5C2G1A1 | IGL c2929_light_IGLV1-51_IGLJ2 (Fragment) |  | 2 | 2.22 | 0.20 |
| A0A5C2G1A4 | IGL c113_light_IGKV3-15_IGKJ1 (Fragment) |  | 3 | 0.28 | 0.23 |
| A0A5C2G1A5 | IGL c1257_light_IGKV1D-13_IGKJ2 (Fragment) |  | 2 | 1.47 | 0.61 |
| A0A5C2G1A6 | IGL c1715_light_IGKV1-27_IGKJ1 (Fragment) |  | 3 | 1.89 | 0.14 |
| A0A5C2G1B1 | IGL c2912_light_IGLV2-14_IGLJ1 (Fragment) |  | 4 | 1.60 | 0.65 |
| A0A5C2G1F7 | IGL c163_light_IGKV3-20_IGKJ1 (Fragment) |  | 1 | 2.49 | 0.14 |
| A0A5C2G1I8 | IGL c2992_light_IGLV3-25_IGLJ2 (Fragment) |  | 3 | 1.46 | 0.14 |
| A0A5C2G1L7 | IGL c1835_light_IGKV1-5_IGKJ1 (Fragment) |  | 1 | 2.03 | 0.37 |
| A0A5C2G1M0 | IGL c233_light_IGLV3-19_IGLJ2 (Fragment) |  | 3 | 2.39 | 0.07 |
| A0A5C2G1M2 | IGL c3171_light_IGLV5-45_IGLJ2 (Fragment) |  | 1 | 1.69 | 0.42 |
| A0A5C2G1M4 | IGL c1367_light_IGKV3-20_IGKJ2 (Fragment) |  | 2 | 1.36 | 0.55 |
| A0A5C2G1N6 | IGL c3052_light_IGKV3-20_IGKJ1 (Fragment) |  | 2 | 1.48 | 0.06 |
| A0A5C2G1P4 | IGL c2470_light_IGLV1-47_IGLJ3 (Fragment) |  | 1 | 3.48 | 0.08 |
| A0A5C2G1U4 | IGL c2426_light_IGKV1-5_IGKJ1 (Fragment) |  | 4 | 1.41 | 0.38 |
| A0A5C2G1X9 | IGL c343_light_IGKV3-20_IGKJ1 (Fragment) |  | 2 | 2.36 | 0.20 |
| A0A5C2G219 | IGL c1862_light_IGKV1-5_IGKJ2 (Fragment) |  | 2 | 0.60 | 0.41 |
| A0A5C2G229 | IGL c2506_light_IGKV1-33_IGKJ4 (Fragment) |  | 1 | 1.86 | 0.11 |
| A0A5C2G285 | IGL c1577_light_IGKV1D-39_IGKJ1 (Fragment) |  | 2 | 2.13 | 0.05 |
| A0A5C2G2B3 | IGL c2710_light_IGLV1-47_IGLJ1 (Fragment) |  | 2 | 2.42 | 0.20 |
| A0A5C2G2C0 | IGL c2586_light_IGKV1-9_IGKJ4 (Fragment) |  | 2 | 5.79 | 0.23 |
| A0A5C2G2E1 | IGL c3441_light_IGKV1D-39_IGKJ2 (Fragment) |  | 2 | 1.23 | 0.34 |
| A0A5C2G2F5 | IGL c2626_light_IGKV1-39_IGKJ2 (Fragment) |  | 2 | 3.64 | 0.22 |
| A0A5C2G2I3 | IGL c3362_light_IGLV2-11_IGLJ2 (Fragment) |  | 2 | 2.26 | 0.25 |
| A0A5C2G2K2 | IGL c3382_light_IGKV1D-12_IGKJ4 (Fragment) |  | 2 | 2.39 | 0.12 |
| A0A5C2G2K8 | IGL c573_light_IGKV3-20_IGKJ3 (Fragment) |  | 1 | 2.51 | 0.20 |
| A0A5C2G2P9 | IGL c2225_light_IGLV1-47_IGLJ2 (Fragment) |  | 3 | 2.01 | 0.09 |
| A0A5C2G2R4 | IGL c2880_light_IGKV3-20_IGKJ1 (Fragment) |  | 1 | 1.60 | 0.10 |
| A0A5C2G2S7 | IGL c2766_light_IGKV1-5_IGKJ2 (Fragment) |  | 4 | 1.79 | 0.20 |
| A0A5C2G2V5 | IGL c3244_light_IGKV2D-40_IGKJ2 (Fragment) |  | 1 | 1.19 | 0.67 |
| A0A5C2G2Z0 | IGL c1787_light_IGKV1D-17_IGKJ2 (Fragment) |  | 2 | 2.46 | 0.36 |
| A0A5C2G309 | IGL c3532_light_IGLV4-69_IGLJ2 (Fragment) |  | 5 | 3.84 | 0.09 |
| A0A5C2G339 | IGL c763_light_IGKV1-6_IGKJ1 (Fragment) |  | 1 | 2.49 | 0.27 |
| A0A5C2G360 | IGL c793_light_IGKV1D-33_IGKJ2 (Fragment) |  | 3 | 1.85 | 0.28 |
| A0A5C2G367 | IGL c3718_light_IGKV1D-39_IGKJ4 (Fragment) |  | 2 | 1.88 | 0.12 |
| A0A5C2G376 | IGL c3569_light_IGKV1-5_IGKJ1 (Fragment) |  | 2 | 2.15 | 0.27 |
| A0A5C2G390 | IGL c3041_light_IGLV3-25_IGLJ2 (Fragment) |  | 1 | 2.77 | 0.22 |
| A0A5C2G3B3 | IGL c3642_light_IGLV1-40_IGLJ1 (Fragment) |  | 1 | 1.87 | 0.22 |
| A0A5C2G3C8 | IGL c1927_light_IGKV3-11_IGKJ4 (Fragment) |  | 1 | 1.27 | 0.35 |
| A0A5C2G3D5 | IGL c1937_light_IGKV4-1_IGKJ2 (Fragment) |  | 4 | 3.36 | 0.21 |
| A0A5C2G3F3 | IGL c3016_light_IGLV3-1_IGLJ2 (Fragment) |  | 1 | 1.28 | 0.69 |
| A0A5C2G3G9 | IGL c3828_light_IGKV3-20_IGKJ1 (Fragment) |  | 4 | 1.52 | 0.45 |
| A0A5C2G3H4 | IGL c3831_light_IGLV1-44_IGLJ3 (Fragment) |  | 2 | 2.05 | 0.35 |
| A0A5C2G3I9 | IGL c3848_light_IGLV6-57_IGLJ3 (Fragment) |  | 3 | 3.74 | 0.19 |
| A0A5C2G3J8 | IGL c3494_light_IGKV1-5_IGKJ1 (Fragment) |  | 3 | 1.36 | 0.49 |
| A0A5C2G3K7 | IGL c3868_light_IGKV1-33_IGKJ4 (Fragment) |  | 1 | 1.32 | 0.12 |
| A0A5C2G3L5 | IGL c2027_light_IGLV1-40_IGLJ3 (Fragment) |  | 6 | 0.85 | 0.74 |
| A0A5C2G3P7 | IGL c3116_light_IGLV2-18_IGLJ3 (Fragment) |  | 2 | 0.84 | 0.40 |
| A0A5C2G3R6 | IGL c3779_light_IGKV3-20_IGKJ3 (Fragment) |  | 1 | 1.48 | 0.41 |
| A0A5C2G3V4 | IGL c3852_light_IGLV2-23_IGLJ2 (Fragment) |  | 4 | 0.79 | 0.79 |
| A0A5C2G3Y2 | IGL c3882_light_IGKV1-5_IGKJ5 (Fragment) |  | 1 | 5.46 | 0.07 |
| A0A5C2G3Z0 | IGL c4011_light_IGKV1D-13_IGKJ3 (Fragment) |  | 4 | 1.49 | 0.39 |
| A0A5C2G420 | IGL c3869_light_IGKV2D-40_IGKJ2 (Fragment) |  | 2 | 2.28 | 0.34 |
| A0A5C2G435 | IGL c1063_light_IGKV3-20_IGKJ4 (Fragment) |  | 2 | 2.40 | 0.26 |
| A0A5C2G4A9 | IGL c1133_light_IGKV3-20_IGKJ1 (Fragment) |  | 3 | 1.95 | 0.26 |
| A0A5C2G4F7 | IGL c3450_light_IGKV1-39_IGKJ1 (Fragment) |  | 4 | 2.01 | 0.43 |
| A0A5C2G4N5 | IGL c3396_light_IGLV2-14_IGLJ3 (Fragment) |  | 1 | 0.52 | 0.46 |
| A0A5C2G4R6 | IGL c2507_light_IGKV1D-39_IGKJ1 (Fragment) |  | 2 | 1.79 | 0.46 |
| A0A5C2G4T4 | IGL c3550_light_IGLV3-19_IGLJ3 (Fragment) |  | 3 | 2.78 | 0.06 |
| A0A5C2G4U1 | IGL c2537_light_IGKV3-11_IGKJ4 (Fragment) |  | 2 | 2.29 | 0.51 |
| A0A5C2G542 | IGH c10_heavy__IGHV5-51_IGHD5-18_IGHJ6 (Fragment) |  | 2 | 0.36 | 0.42 |
| A0A5C2G569 | IGH c50_heavy__IGHV3-21_IGHD3-22_IGHJ5 (Fragment) |  | 3 | 0.69 | 0.33 |
| A0A5C2G571 | IGL c4094_light_IGLV1-51_IGLJ2 (Fragment) |  | 2 | 2.93 | 0.21 |
| A0A5C2G586 | IGH c149_heavy__IGHV3-20_IGHD3-10_IGHJ6 (Fragment) |  | 1 | 2.22 | 0.26 |
| A0A5C2G597 | IGL c4124_light_IGLV1-51_IGLJ2 (Fragment) |  | 1 | 0.91 | 0.80 |
| A0A5C2G5D3 | IGH c199_heavy__IGHV1-24_IGHD3-10_IGHJ5 (Fragment) |  | 2 | 13.51 | 0.38 |
| A0A5C2G5J5 | IGL c1613_light_IGLV3-1_IGLJ2 (Fragment) |  | 1 | 1.57 | 0.32 |
| A0A5C2G5R3 | IGH c290_heavy__IGHV3-7_IGHD1-14_IGHJ4 (Fragment) |  | 2 | 1.05 | 0.90 |
| A0A5C2G5S3 | IGL c3786_light_IGLV1-44_IGLJ1 (Fragment) |  | 7 | 2.78 | 0.15 |
| A0A5C2G5W5 | IGL c3990_light_IGLV1-47_IGLJ2 (Fragment) |  | 2 | 1.33 | 0.37 |
| A0A5C2G5W6 | IGL c3185_light_IGKV3-20_IGKJ1 (Fragment) |  | 2 | 4.22 | 0.12 |
| A0A5C2G5Z9 | IGL c4040_light_IGKV3-20_IGKJ2 (Fragment) |  | 1 | 1.36 | 0.44 |
| A0A5C2G615 | IGH c399_heavy__IGHV3-21_IGHD3-9_IGHJ5 (Fragment) |  | 2 | 2.03 | 0.19 |
| A0A5C2G617 | IGH c127_heavy__IGHV1-69_IGHD3-22_IGHJ4 (Fragment) |  | 1 | 1.27 | 0.45 |
| A0A5C2G631 | IGL c3255_light_IGKV3-15_IGKJ4 (Fragment) |  | 4 | 4.36 | 0.18 |
| A0A5C2G649 | IGH c446_heavy__IGHV3-21_IGHD3-9_IGHJ4 (Fragment) |  | 2 | 2.24 | 0.51 |
| A0A5C2G662 | IGH c466_heavy__IGHV3-20_IGHD7-27_IGHJ2 (Fragment) |  | 4 | 1.50 | 0.38 |
| A0A5C2G676 | IGH c82_heavy__IGHV1-69_IGHD3-10_IGHJ6 (Fragment) |  | 1 | 2.05 | 0.30 |
| A0A5C2G678 | IGL c1903_light_IGLV3-27_IGLJ3 (Fragment) |  | 4 | 1.63 | 0.39 |
| A0A5C2G686 | IGH c506_heavy__IGHV3-43_IGHD2-15_IGHJ4 (Fragment) |  | 2 | 1.55 | 0.23 |
| A0A5C2G6B6 | IGH c217_heavy__IGHV3-33_IGHD6-19_IGHJ4 (Fragment) |  | 1 | 0.91 | 0.85 |
| A0A5C2G6G1 | IGL c3946_light_IGLV3-10_IGLJ3 (Fragment) |  | 3 | 2.24 | 0.12 |
| A0A5C2G6H5 | IGH c192_heavy__IGHV3-74_IGHD5-18_IGHJ6 (Fragment) |  | 2 | 1.08 | 0.92 |
| A0A5C2G6I4 | IGL c2033_light_IGKV3-11_IGKJ4 (Fragment) |  | 2 | 0.45 | 0.41 |
| A0A5C2G6I5 | IGL c14_light_IGKV2-28_IGKJ2 (Fragment) |  | 1 | 1.77 | 0.23 |
| A0A5C2G6J5 | IGH c549_heavy__IGHV3-33_IGHD6-13_IGHJ4 (Fragment) |  | 1 | 2.98 | 0.21 |
| A0A5C2G6J6 | IGH c212_heavy__IGHV3-9_IGHD2-15_IGHJ4 (Fragment) |  | 1 | 1.07 | 0.87 |
| A0A5C2G6J9 | IGL c3415_light_IGKV1D-13_IGKJ2 (Fragment) |  | 2 | 1.99 | 0.22 |
| A0A5C2G6M6 | IGH c242_heavy__IGHV3-11_IGHD6-13_IGHJ6 (Fragment) |  | 2 | 1.14 | 0.85 |
| A0A5C2G6N3 | IGL c18_light_IGLV3-25_IGLJ2 (Fragment) |  | 1 | 2.02 | 0.25 |
| A0A5C2G6P7 | IGL c84_light_IGKV1-5_IGKJ1 (Fragment) |  | 1 | 1.86 | 0.20 |
| A0A5C2G6R8 | IGL c3475_light_IGKV1D-33_IGKJ4 (Fragment) |  | 1 | 1.95 | 0.17 |
| A0A5C2G6S4 | IGL c27_light_IGLV3-21_IGLJ2 (Fragment) |  | 3 | 1.03 | 0.88 |
| A0A5C2G6T3 | IGL c2143_light_IGLV2-14_IGLJ1 (Fragment) |  | 4 | 1.15 | 0.71 |
| A0A5C2G6T6 | IGH c8_heavy__IGHV3-74_IGHD1-26_IGHJ1 (Fragment) |  | 2 | 0.76 | 0.17 |
| A0A5C2G6X2 | IGL c2183_light_IGKV3-11_IGKJ4 (Fragment) |  | 1 | 1.80 | 0.42 |
| A0A5C2G6X6 | IGL c87_light_IGLV3-21_IGLJ2 (Fragment) |  | 4 | 1.41 | 0.55 |
| A0A5C2G711 | IGL c224_light_IGKV3-11_IGKJ4 (Fragment) |  | 7 | 1.50 | 0.48 |
| A0A5C2G716 | IGH c427_heavy__IGHV3-74_IGHD7-27_IGHJ4 (Fragment) |  | 1 | 1.67 | 0.05 |
| A0A5C2G725 | IGL c198_light_IGKV1-12_IGKJ2 (Fragment) |  | 5 | 3.80 | 0.19 |
| A0A5C2G728 | IGL c3515_light_IGLV4-69_IGLJ3 (Fragment) |  | 1 | 2.08 | 0.33 |
| A0A5C2G750 | IGL c228_light_IGLV2-11_IGLJ3 (Fragment) |  | 1 | 2.43 | 0.20 |
| A0A5C2G767 | IGH c442_heavy__IGHV3-23_IGHD4-17_IGHJ4 (Fragment) |  | 1 | 0.59 | 0.28 |
| A0A5C2G770 | IGL c294_light_IGLV2-23_IGLJ3 (Fragment) |  | 1 | 1.58 | 0.09 |
| A0A5C2G773 | IGH c452_heavy__IGHV3-7_IGHD3-3_IGHJ4 (Fragment) |  | 3 | 1.60 | 0.24 |
| A0A5C2G781 | IGL c3567_light_IGKV1-39_IGKJ2 (Fragment) |  | 2 | 1.21 | 0.59 |
| A0A5C2G7C4 | IGH c228_heavy__IGHV3-48_IGHD5-24_IGHJ6 (Fragment) |  | 3 | 0.62 | 0.62 |
| A0A5C2G7F8 | IGL c368_light_IGLV2-11_IGLJ1 (Fragment) |  | 1 | 2.66 | 0.28 |
| A0A5C2G7G7 | IGH c373_heavy__IGHV3-23_IGHD3-10_IGHJ4 (Fragment) |  | 1 | 0.96 | 0.93 |
| A0A5C2G7G8 | IGL c3635_light_IGLV3-10_IGLJ3 (Fragment) |  | 3 | 1.23 | 0.71 |
| A0A5C2G7H3 | IGL c3697_light_IGLV6-57_IGLJ2 (Fragment) |  | 6 | 1.83 | 0.33 |
| A0A5C2G7I0 | IGL c2353_light_IGKV3-20_IGKJ3 (Fragment) |  | 1 | 1.41 | 0.59 |
| A0A5C2G7I4 | IGH c572_heavy__IGHV3-21_IGHD5-18_IGHJ5 (Fragment) |  | 1 | 1.43 | 0.56 |
| A0A5C2G7J4 | IGL c454_light_IGKV3-11_IGKJ2 (Fragment) |  | 1 | 1.08 | 0.95 |
| A0A5C2G7Q0 | IGH c398_heavy__IGHV1-24_IGHD3-10_IGHJ5 (Fragment) |  | 1 | 1.75 | 0.28 |
| A0A5C2G7R8 | IGH c557_heavy__IGHV4-34_IGHD3-9_IGHJ4 (Fragment) |  | 3 | 4.09 | 0.08 |
| A0A5C2G7T9 | IGL c2483_light_IGKV4-1_IGKJ1 (Fragment) |  | 3 | 2.04 | 0.18 |
| A0A5C2G7V5 | IGL c594_light_IGKV3-20_IGKJ1 (Fragment) |  | 1 | 2.37 | 0.60 |
| A0A5C2G7Y2 | IGH c498_heavy__IGHV4-39_IGHD3-3_IGHJ6 (Fragment) |  | 2 | 1.06 | 0.94 |
| A0A5C2G7Y9 | IGH c508_heavy__IGHV3-33_IGHD1-7_IGHJ4 (Fragment) |  | 2 | 2.17 | 0.12 |
| A0A5C2G801 | IGL c3877_light_IGKV1-12_IGKJ5 (Fragment) |  | 2 | 2.07 | 0.54 |
| A0A5C2G810 | IGL c507_light_IGKV1D-39_IGKJ1 (Fragment) |  | 2 | 1.77 | 0.49 |
| A0A5C2G816 | IGH + IGL c16_heavy_IGHV3-48_IGHD3-3_IGHJ4 (Fragment) |  | 4 | 1.68 | 0.36 |
| A0A5C2G829 | IGL c527_light_IGKV1-16_IGKJ4 (Fragment) |  | 1 | 1.00 | 0.99 |
| A0A5C2G830 | IGH c558_heavy__IGHV3-43_IGHD3-10_IGHJ1 (Fragment) |  | 1 | 0.44 | 0.08 |
| A0A5C2G847 | IGH c578_heavy__IGHV3-74_IGHD1-26_IGHJ4 (Fragment) |  | 5 | 1.47 | 0.62 |
| A0A5C2G850 | IGH + IGL c46_heavy_IGHV3-43_IGHD6-19_IGHJ4 (Fragment) |  | 3 | 1.85 | 0.21 |
| A0A5C2G896 | IGH c154_heavy__IGHV5-51_IGHD3-16_IGHJ4 (Fragment) |  | 2 | 1.38 | 0.44 |
| A0A5C2G898 | IGL c240_light_IGKV3-20_IGKJ2 (Fragment) |  | 1 | 2.13 | 0.09 |
| A0A5C2G8C6 | IGL c56_light_IGKV3D-20_IGKJ4 (Fragment) |  | 3 | 1.11 | 0.78 |
| A0A5C2G8D9 | IGL c290_light_IGLV1-47_IGLJ2 (Fragment) |  | 3 | 1.27 | 0.15 |
| A0A5C2G8L5 | IGL c156_light_IGLV2-23_IGLJ2 (Fragment) |  | 3 | 1.52 | 0.46 |
| A0A5C2G8R2 | IGH c314_heavy__IGHV3-30_IGHD6-6_IGHJ6 (Fragment) |  | 2 | 0.07 | 0.39 |
| A0A5C2G8R7 | IGL c430_light_IGKV4-1_IGKJ1 (Fragment) |  | 2 | 0.85 | 0.77 |
| A0A5C2G8S3 | IGH + IGL c73_heavy_IGHV4-39_IGHD6-19_IGHJ3 (Fragment) |  | 1 | 0.45 | 0.42 |
| A0A5C2G8S9 | IGH + IGL c230_heavy_IGHV3-33_IGHD3-10_IGHJ1 (Fragment) |  | 2 | 0.64 | 0.22 |
| A0A5C2G8V3 | IGH + IGL c260_heavy_IGHV3-30_IGHD3-22_IGHJ4 (Fragment) |  | 3 | 0.70 | 0.59 |
| A0A5C2G8W6 | IGL c276_light_IGKV1-39_IGKJ2 (Fragment) |  | 1 | 1.67 | 0.26 |
| A0A5C2G8X7 | IGL c286_light_IGKV1-5_IGKJ1 (Fragment) |  | 1 | 1.52 | 0.52 |
| A0A5C2G8X8 | IGH + IGL c290_heavy_IGHV3-30_IGHD3-3_IGHJ6 (Fragment) |  | 3 | 1.00 | 0.99 |
| A0A5C2G8Y9 | IGH + IGL c300_heavy_IGHV3-15_IGHD3-10_IGHJ4 (Fragment) |  | 4 | 2.24 | 0.33 |
| A0A5C2G8Z6 | IGL c4177_light_IGKV1D-13_IGKJ4 (Fragment) |  | 4 | 1.35 | 0.49 |
| A0A5C2G919 | IGL c540_light_IGKV1-5_IGKJ1 (Fragment) |  | 1 | 3.27 | 0.21 |
| A0A5C2G922 | IGH c434_heavy__IGHV3-49_IGHD2-21_IGHJ4 (Fragment) |  | 2 | 0.79 | 0.56 |
| A0A5C2G929 | IGL c4207_light_IGKV1-5_IGKJ3 (Fragment) |  | 3 | 5.68 | 0.12 |
| A0A5C2G943 | IGL c560_light_IGKV1-5_IGKJ3 (Fragment) |  | 2 | 1.62 | 0.27 |
| A0A5C2G947 | IGH + IGL c284_heavy_IGHV4-34_IGHD1-26_IGHJ6 (Fragment) |  | 1 | 1.79 | 0.33 |
| A0A5C2G967 | IGH c484_heavy__IGHV1-69_IGHD3-16_IGHJ5 (Fragment) |  | 1 | 0.87 | 0.39 |
| A0A5C2G978 | IGH + IGL c390_heavy_IGHV1-8_IGHD2-2_IGHJ5 (Fragment) |  | 2 | 1.39 | 0.49 |
| A0A5C2G984 | IGH + IGL c324_heavy_IGHV3-15_IGHD3-16_IGHJ5 (Fragment) |  | 3 | 3.29 | 0.43 |
| A0A5C2G989 | IGH + IGL c253_heavy_IGHV3-48_IGHD3-22_IGHJ4 (Fragment) |  | 1 | 8.04 | 0.26 |
| A0A5C2G9C4 | IGH + IGL c38_heavy_IGHV5-51_IGHD4-17_IGHJ4 (Fragment) |  | 1 | 1.48 | 0.50 |
| A0A5C2G9I6 | IGL c442_light_IGKV1D-39_IGKJ1 (Fragment) |  | 3 | 1.82 | 0.15 |
| A0A5C2G9L4 | IGH + IGL c494_heavy_IGHV3-9_IGHD4-11_IGHJ3 (Fragment) |  | 7 | 1.44 | 0.08 |
| A0A5C2G9L9 | IGL c556_light_IGKV3-20_IGKJ3 (Fragment) |  | 2 | 1.12 | 0.90 |
| A0A5C2G9P9 | IGH + IGL c550_heavy_IGHV3-11_IGHD3-3_IGHJ6 (Fragment) |  | 1 | 1.34 | 0.52 |
| A0A5C2G9Q2 | IGL c555_light_IGKV3-11_IGKJ4 (Fragment) |  | 4 | 2.18 | 0.14 |
| A0A5C2G9R7 | IGH + IGL c554_heavy_IGHV3-53_IGHD6-13_IGHJ5 (Fragment) |  | 2 | 1.15 | 0.92 |
| A0A5C2G9U1 | IGL c152_light_IGKV1-12_IGKJ2 (Fragment) |  | 1 | 4.80 | 0.09 |
| A0A5C2G9Z5 | IGH c85_heavy__IGHV3-9_IGHD1-1_IGHJ6 (Fragment) |  | 2 | 1.94 | 0.19 |
| A0A5C2GA30 | IGH + IGL c136_heavy_IGHV3-15_IGHD4-17_IGHJ1 (Fragment) |  | 1 | 1.31 | 0.49 |
| A0A5C2GA43 | IGH + IGL c42_heavy_IGHV3-23_IGHD2-15_IGHJ5 (Fragment) |  | 2 | 0.46 | 0.48 |
| A0A5C2GA56 | IGH c145_heavy__IGHV3-20_IGHD3-10_IGHJ4 (Fragment) |  | 1 | 0.04 | 0.35 |
| A0A5C2GA59 | IGH + IGL c1_heavy_IGHV3-48_IGHD3-10_IGHJ4 (Fragment) |  | 2 | 2.27 | 0.16 |
| A0A5C2GA61 | IGL c282_light_IGKV3D-20_IGKJ1 (Fragment) |  | 1 | 3.25 | 0.23 |
| A0A5C2GA71 | IGL c292_light_IGKV1D-39_IGKJ2 (Fragment) |  | 1 | 3.85 | 0.08 |
| A0A5C2GA89 | IGH c185_heavy__IGHV3-7_IGHD3-16_IGHJ4 (Fragment) |  | 2 | 1.68 | 0.31 |
| A0A5C2GA91 | IGL c3373_light_IGKV4-1_IGKJ1 (Fragment) |  | 3 | 2.16 | 0.06 |
| A0A5C2GAA8 | IGH + IGL c71_heavy_IGHV1-46_IGHD6-25_IGHJ5 (Fragment) |  | 1 | 2.27 | 0.48 |
| A0A5C2GAB7 | IGH + IGL c62_heavy_IGHV3-7_IGHD3-22_IGHJ5 (Fragment) |  | 4 | 1.63 | 0.14 |
| A0A5C2GAC2 | IGH c225_heavy__IGHV3-48_IGHD5-12_IGHJ1 (Fragment) |  | 2 | 10.82 | 0.29 |
| A0A5C2GAC5 | IGH + IGL c72_heavy_IGHV3-23_IGHD5-24_IGHJ5 (Fragment) |  | 1 | 1.65 | 0.30 |
| A0A5C2GAF0 | IGH + IGL c182_light_IGKV3-11_IGKJ5 (Fragment) |  | 1 | 3.21 | 0.54 |
| A0A5C2GAH0 | IGH + IGL c196_light_IGKV4-1_IGKJ1 (Fragment) |  | 3 | 2.75 | 0.25 |
| A0A5C2GAK7 | IGL c462_light_IGKV3-15_IGKJ1 (Fragment) |  | 1 | 2.14 | 0.30 |
| A0A5C2GAL0 | IGH + IGL c112_heavy_IGHV3-23_IGHD5-24_IGHJ6 (Fragment) |  | 2 | 1.00 | 1.00 |
| A0A5C2GAQ1 | IGH + IGL c336_heavy_IGHV3-23_IGHD3-22_IGHJ5 (Fragment) |  | 2 | 0.77 | 0.57 |
| A0A5C2GAQ3 | IGH + IGL c282_light_IGKV4-1_IGKJ1 (Fragment) |  | 3 | 0.78 | 0.65 |
| A0A5C2GAR1 | IGH + IGL c172_heavy_IGHV3-23_IGHD2-21_IGHJ4 (Fragment) |  | 2 | 1.35 | 0.66 |
| A0A5C2GAS8 | IGH + IGL c366_heavy_IGHV3-74_IGHD2-21_IGHJ4 (Fragment) |  | 1 | 1.40 | 0.45 |
| A0A5C2GAT0 | IGH + IGL c306_light_IGKV3-20_IGKJ1 (Fragment) |  | 3 | 1.91 | 0.48 |
| A0A5C2GAT2 | IGL c3503_light_IGKV4-1_IGKJ2 (Fragment) |  | 1 | 0.78 | 0.73 |
| A0A5C2GAU8 | IGH + IGL c215_light_IGKV3-20_IGKJ1 (Fragment) |  | 1 | 1.52 | 0.49 |
| A0A5C2GAW3 | IGH c453_heavy__IGHV3-11_IGHD4-17_IGHJ3 (Fragment) |  | 3 | 1.32 | 0.51 |
| A0A5C2GAZ8 | IGH c405_heavy__IGHV3-43_IGHD3-22_IGHJ4 (Fragment) |  | 2 | 3.07 | 0.18 |
| A0A5C2GB27 | IGH + IGL c285_light_IGKV1-5_IGKJ2 (Fragment) |  | 4 | 1.85 | 0.31 |
| A0A5C2GB28 | IGL c3583_light_IGKV3D-15_IGKJ5 (Fragment) |  | 1 | 1.45 | 0.44 |
| A0A5C2GB34 | IGH c445_heavy__IGHV3-11_IGHD6-13_IGHJ4 (Fragment) |  | 2 | 2.75 | 0.33 |
| A0A5C2GB36 | IGH + IGL c295_light_IGKV4-1_IGKJ3 (Fragment) |  | 3 | 3.14 | 0.13 |
| A0A5C2GB39 | IGH + IGL c412_light_IGKV4-1_IGKJ5 (Fragment) |  | 1 | 1.98 | 0.40 |
| A0A5C2GB47 | IGH + IGL c426_light_IGKV3-20_IGKJ3 (Fragment) |  | 1 | 3.54 | 0.08 |
| A0A5C2GB67 | IGH + IGL c442_light_IGKV2-28_IGKJ2 (Fragment) |  | 1 | 0.06 | 0.37 |
| A0A5C2GBB3 | IGH + IGL c496_light_IGLV1-51_IGLJ2 (Fragment) |  | 2 | 7.09 | 0.23 |
| A0A5C2GBB4 | IGH + IGL c375_light_IGKV1-33_IGKJ4 (Fragment) |  | 1 | 1.64 | 0.19 |
| A0A5C2GBB8 | IGH + IGL c8_heavy_IGHV1-2_IGHD3-10_IGHJ6 (Fragment) |  | 1 | 1.24 | 0.58 |
| A0A5C2GBC3 | IGH + IGL c506_light_IGKV3-20_IGKJ4 (Fragment) |  | 1 | 2.97 | 0.15 |
| A0A5C2GBI3 | IGH + IGL c392_heavy_IGHV1-18_IGHD3-9_IGHJ6 (Fragment) |  | 1 | 1.45 | 0.32 |
| A0A5C2GBL4 | IGH + IGL c8_light_IGLV2-14_IGLJ3 (Fragment) |  | 2 | 0.94 | 0.87 |
| A0A5C2GBM4 | IGH + IGL c591_heavy_IGHV1-69_IGHD3-16_IGHJ6 (Fragment) |  | 2 | 1.10 | 0.85 |
| A0A5C2GBP5 | IGH + IGL c515_light_IGLV3-25_IGLJ1 (Fragment) |  | 4 | 1.79 | 0.31 |
| A0A5C2GBQ0 | IGL c73_light_IGKV1D-13_IGKJ1 (Fragment) |  | 1 | 5.14 | 0.14 |
| A0A5C2GBR3 | IGH + IGL c492_heavy_IGHV3-20_IGHD3-22_IGHJ4 (Fragment) |  | 2 | 2.74 | 0.19 |
| A0A5C2GBW7 | IGH + IGL c595_light_IGKV1-5_IGKJ4 (Fragment) |  | 1 | 1.13 | 0.76 |
| A0A5C2GBZ9 | IGH + IGL c178_light_IGKV3-15_IGKJ5 (Fragment) |  | 2 | 1.39 | 0.34 |
| A0A5C2GC00 | IGH + IGL c93_light_IGKV1-5_IGKJ1 (Fragment) |  | 2 | 0.79 | 0.59 |
| A0A5C2GC49 | IGH + IGL c153_light_IGKV3-20_IGKJ4 (Fragment) |  | 2 | 2.51 | 0.20 |
| A0A5C2GC74 | IGL c311_light_IGKV1-5_IGKJ2 (Fragment) |  | 1 | 1.55 | 0.31 |
| A0A5C2GC79 | IGH + IGL c193_light_IGLV3-25_IGLJ3 (Fragment) |  | 1 | 3.65 | 0.21 |
| A0A5C2GCI4 | IGH + IGL c458_heavy_IGHV3-30_IGHD3-16_IGHJ3 (Fragment) |  | 1 | 4.31 | 0.29 |
| A0A5C2GCJ9 | IGL c313_light_IGKV1D-17_IGKJ3 (Fragment) |  | 3 | 1.12 | 0.77 |
| A0A5C2GCK5 | IGH + IGL c478_heavy_IGHV3-21_IGHD6-19_IGHJ6 (Fragment) |  | 2 | 1.22 | 0.71 |
| A0A5C2GCL4 | IGH + IGL c488_heavy_IGHV5-51_IGHD3-10_IGHJ6 (Fragment) |  | 2 | 1.12 | 0.80 |
| A0A5C2GCN1 | IGH + IGL c438_light_IGLV1-47_IGLJ3 (Fragment) |  | 2 | 3.48 | 0.14 |
| A0A5C2GCN9 | IGH + IGL c448_light_IGKV3-20_IGKJ5 (Fragment) |  | 1 | 1.20 | 0.69 |
| A0A5C2GCQ3 | IGH + IGL c373_light_IGLV1-47_IGLJ3 (Fragment) |  | 2 | 4.01 | 0.11 |
| A0A5C2GCQ4 | IGH + IGL c468_light_IGLV3-25_IGLJ3 (Fragment) |  | 3 | 3.35 | 0.15 |
| A0A5C2GCV4 | IG c733_heavy_IGHV1-18_IGHD6-19_IGHJ4 (Fragment) |  | 3 | 2.91 | 0.34 |
| A0A5C2GCV9 | IGL c561_light_IGLV1-44_IGLJ3 (Fragment) |  | 4 | 1.78 | 0.20 |
| A0A5C2GCX0 | IGL c571_light_IGKV1-12_IGKJ5 (Fragment) |  | 1 | 1.88 | 0.23 |
| A0A5C2GCY9 | IGH + IGL c558_light_IGKV1-12_IGKJ4 (Fragment) |  | 2 | 2.64 | 0.17 |
| A0A5C2GD14 | IG c725_heavy_IGHV1-18_IGHD6-6_IGHJ4 (Fragment) |  | 2 | 1.38 | 0.62 |
| A0A5C2GD17 | IGL c483_light_IGKV3D-20_IGKJ1 (Fragment) |  | 1 | 1.52 | 0.36 |
| A0A5C2GD51 | IGH + IGL c20_light_IGLV1-51_IGLJ3 (Fragment) |  | 6 | 5.53 | 0.21 |
| A0A5C2GD57 | IGH + IGL c628_light_IGLV2-14_IGLJ1 (Fragment) |  | 2 | 1.73 | 0.37 |
| A0A5C2GD82 | IGH + IGL c424_light_IGLV2-23_IGLJ2 (Fragment) |  | 1 | 2.86 | 0.22 |
| A0A5C2GD92 | IGH + IGL c434_light_IGKV1-5_IGKJ1 (Fragment) |  | 1 | 1.54 | 0.43 |
| A0A5C2GDI2 | IGH c31_heavy__IGHV5-51_IGHD3-16_IGHJ4 (Fragment) |  | 2 | 1.68 | 0.47 |
| A0A5C2GDK6 | IGH + IGL c45_light_IGLV1-44_IGLJ2 (Fragment) |  | 2 | 1.47 | 0.06 |
| A0A5C2GDM9 | IGH c71_heavy__IGHV3-7_IGHD4-23_IGHJ3 (Fragment) |  | 3 | 1.04 | 0.81 |
| A0A5C2GDN3 | IG c481_heavy_IGHV3-11_IGHD3-22_IGHJ4 (Fragment) |  | 3 | 1.09 | 0.86 |
| A0A5C2GDS5 | IG c206_heavy_IGHV3-15_IGHD4-17_IGHJ6 (Fragment) |  | 3 | 2.05 | 0.19 |
| A0A5C2GDU0 | IGH c141_heavy__IGHV5-51_IGHD3-22_IGHJ4 (Fragment) |  | 3 | 1.09 | 0.88 |
| A0A5C2GDU6 | IG c1122_heavy_IGHV3-13_IGHD2-15_IGHJ6 (Fragment) |  | 2 | 1.41 | 0.34 |
| A0A5C2GDV0 | IGH + IGL c280_light_IGKV1D-33_IGKJ4 (Fragment) |  | 1 | 1.55 | 0.48 |
| A0A5C2GDV9 | IG c1211_heavy_IGHV3-20_IGHD6-13_IGHJ4 (Fragment) |  | 2 | 1.34 | 0.44 |
| A0A5C2GDW0 | IGH + IGL c207_heavy_IGHV3-53_IGHD2-8_IGHJ2 (Fragment) |  | 1 | 1.47 | 0.27 |
| A0A5C2GDX1 | IGH + IGL c119_heavy_IGHV3-30_IGHD4-17_IGHJ4 (Fragment) |  | 4 | 1.08 | 0.79 |
| A0A5C2GDX4 | IG c1088_heavy_IGHV3-15_IGHD2-15_IGHJ4 (Fragment) |  | 1 | 1.63 | 0.53 |
| A0A5C2GDY1 | IG c754_heavy_IGHV3-20_IGHD3-3_IGHJ4 (Fragment) |  | 1 | 1.21 | 0.54 |
| A0A5C2GDY9 | IG c42_heavy_IGHV3-21_IGHD6-19_IGHJ4 (Fragment) |  | 1 | 1.24 | 0.54 |
| A0A5C2GDZ4 | IG c342_heavy_IGHV3-21_IGHD3-9_IGHJ4 (Fragment) |  | 2 | 2.71 | 0.26 |
| A0A5C2GDZ5 | IGH + IGL c257_heavy_IGHV4-34_IGHD4-23_IGHJ3 (Fragment) |  | 2 | 0.81 | 0.53 |
| A0A5C2GDZ7 | IGH c221_heavy__IGHV3-48_IGHD4-23_IGHJ6 (Fragment) |  | 2 | 1.55 | 0.23 |
| A0A5C2GE11 | IG c756_heavy_IGHV3-21_IGHD7-27_IGHJ4 (Fragment) |  | 1 | 1.44 | 0.41 |
| A0A5C2GE26 | IG c1327_heavy_IGHV3-21_IGHD3-3_IGHJ6 (Fragment) |  | 2 | 6.57 | 0.44 |
| A0A5C2GE41 | IG c125_heavy_IGHV3-23_IGHD2-8_IGHJ4 (Fragment) |  | 2 | 1.43 | 0.38 |
| A0A5C2GE53 | IGH + IGL c327_heavy_IGHV3-21_IGHD6-6_IGHJ2 (Fragment) |  | 3 | 52.94 | 0.43 |
| A0A5C2GE58 | IG c273_heavy_IGHV3-23_IGHD3-22_IGHJ5 (Fragment) |  | 1 | 0.98 | 0.99 |
| A0A5C2GE65 | IG c1144_heavy_IGHV3-23_IGHD6-13_IGHJ3 (Fragment) |  | 3 | 2.16 | 0.14 |
| A0A5C2GE75 | IG c662_heavy_IGHV3-23_IGHD1-26_IGHJ4 (Fragment) |  | 3 | 2.60 | 0.17 |
| A0A5C2GE94 | IG c1052_heavy_IGHV3-23_IGHD6-13_IGHJ4 (Fragment) |  | 3 | 0.97 | 0.96 |
| A0A5C2GE99 | IG c1196_heavy_IGHV3-23_IGHD6-19_IGHJ4 (Fragment) |  | 2 | 0.45 | 0.29 |
| A0A5C2GEA7 | IG c1314_heavy_IGHV3-23_IGHD3-10_IGHJ4 (Fragment) |  | 2 | 1.59 | 0.35 |
| A0A5C2GEF9 | IG c785_heavy_IGHV1-2_IGHD5-18_IGHJ4 (Fragment) |  | 1 | 1.13 | 0.55 |
| A0A5C2GEH1 | IG c1238_heavy_IGHV3-30_IGHD4-11_IGHJ4 (Fragment) |  | 6 | 0.93 | 0.88 |
| A0A5C2GEI8 | IGH c441_heavy__IGHV3-72_IGHD3-22_IGHJ4 (Fragment) |  | 3 | 1.33 | 0.56 |
| A0A5C2GEJ3 | IG c1203_heavy_IGHV3-23_IGHD5-12_IGHJ3 (Fragment) |  | 2 | 1.14 | 0.81 |
| A0A5C2GEJ5 | IGH + IGL c477_heavy_IGHV1-69_IGHD4-17_IGHJ3 (Fragment) |  | 1 | 0.71 | 0.23 |
| A0A5C2GEN3 | IG c374_heavy_IGHV3-30_IGHD3-9_IGHJ1 (Fragment) |  | 3 | 1.68 | 0.46 |
| A0A5C2GER5 | IG c1063_heavy_IGHV3-33_IGHD1-1_IGHJ3 (Fragment) |  | 2 | 2.83 | 0.08 |
| A0A5C2GET5 | IG c120_heavy_IGHV3-49_IGHD2-2_IGHJ3 (Fragment) |  | 1 | 0.15 | 0.36 |
| A0A5C2GEU1 | IGH + IGL c399_heavy_IGHV3-48_IGHD4-17_IGHJ6 (Fragment) |  | 1 | 0.95 | 0.91 |
| A0A5C2GEU3 | IG c810_heavy_IGHV3-49_IGHD7-27_IGHJ6 (Fragment) |  | 6 | 0.22 | 0.24 |
| A0A5C2GEV4 | IG c952_heavy_IGHV3-48_IGHD6-19_IGHJ4 (Fragment) |  | 2 | 1.35 | 0.74 |
| A0A5C2GEV9 | IG c882_heavy_IGHV1-18_IGHD5-24_IGHJ4 (Fragment) |  | 1 | 1.09 | 0.70 |
| A0A5C2GEW6 | IG c77_heavy_IGHV3-11_IGHD2-2_IGHJ6 (Fragment) |  | 1 | 0.77 | 0.48 |
| A0A5C2GEX7 | IG c378_heavy_IGHV3-11_IGHD4-17_IGHJ4 (Fragment) |  | 3 | 25.53 | 0.11 |
| A0A5C2GF02 | IGH + IGL c459_heavy_IGHV3-23_IGHD6-19_IGHJ4 (Fragment) |  | 1 | 0.95 | 0.89 |
| A0A5C2GF35 | IG c13_heavy_IGHV3-15_IGHD3-3_IGHJ4 (Fragment) |  | 1 | 0.21 | 0.41 |
| A0A5C2GF44 | IG c1250_heavy_IGHV3-15_IGHD1-26_IGHJ2 (Fragment) |  | 5 | 1.65 | 0.09 |
| A0A5C2GF46 | IG c1011_heavy_IGHV3-7_IGHD3-3_IGHJ1 (Fragment) |  | 1 | 1.34 | 0.46 |
| A0A5C2GF48 | IG c1070_heavy_IGHV3-74_IGHD2-15_IGHJ2 (Fragment) |  | 3 | 4.05 | 0.16 |
| A0A5C2GF51 | IG c1306_heavy_IGHV1-2_IGHD1-26_IGHJ4 (Fragment) |  | 2 | 0.82 | 0.77 |
| A0A5C2GF53 | IGL c9_light_IGLV2-11_IGLJ1 (Fragment) |  | 1 | 0.95 | 0.96 |
| A0A5C2GF54 | IG c990_heavy_IGHV3-20_IGHD5-18_IGHJ3 (Fragment) |  | 2 | 2.95 | 0.09 |
| A0A5C2GF65 | IG c111_heavy_IGHV3-21_IGHD4-11_IGHJ4 (Fragment) |  | 3 | 4.86 | 0.13 |
| A0A5C2GFC3 | IG c332_heavy_IGHV3-7_IGHD2-15_IGHJ1 (Fragment) |  | 3 | 2.08 | 0.29 |
| A0A5C2GFE8 | IG c282_heavy_IGHV3-23_IGHD3-22_IGHJ4 (Fragment) |  | 3 | 1.40 | 0.18 |
| A0A5C2GFF3 | IG c1142_heavy_IGHV3-73_IGHD3-22_IGHJ4 (Fragment) |  | 2 | 3.54 | 0.42 |
| A0A5C2GFF7 | IG c500_heavy_IGHV3-23_IGHD6-19_IGHJ4 (Fragment) |  | 1 | 1.43 | 0.79 |
| A0A5C2GFG2 | IG c536_heavy_IGHV3-74_IGHD3-3_IGHJ6 (Fragment) |  | 2 | 0.54 | 0.37 |
| A0A5C2GFH2 | IG c1172_heavy_IGHV3-74_IGHD3-16_IGHJ3 (Fragment) |  | 4 | 0.52 | 0.42 |
| A0A5C2GFK6 | IGL c169_light_IGKV3-20_IGKJ2 (Fragment) |  | 3 | 0.63 | 0.63 |
| A0A5C2GFM2 | IG c906_heavy_IGHV3-11_IGHD3-22_IGHJ4 (Fragment) |  | 2 | 1.98 | 0.35 |
| A0A5C2GFQ0 | IGL c219_light_IGLV1-40_IGLJ3 (Fragment) |  | 1 | 0.47 | 0.29 |
| A0A5C2GFQ6 | IG c672_heavy_IGHV3-15_IGHD6-6_IGHJ4 (Fragment) |  | 2 | 1.56 | 0.57 |
| A0A5C2GFR0 | IG c141_heavy_IGHV3-13_IGHD3-10_IGHJ6 (Fragment) |  | 1 | 1.16 | 0.54 |
| A0A5C2GFS6 | IG c512_heavy_IGHV3-20_IGHD5-18_IGHJ5 (Fragment) |  | 2 | 2.17 | 0.06 |
| A0A5C2GFT3 | IG c966_heavy_IGHV4-34_IGHD6-13_IGHJ4 (Fragment) |  | 1 | 2.09 | 0.13 |
| A0A5C2GFU1 | IG c675_heavy_IGHV3-15_IGHD5-24_IGHJ3 (Fragment) |  | 2 | 1.12 | 0.85 |
| A0A5C2GFV6 | IG c1073_heavy_IGHV3-15_IGHD3-22_IGHJ5 (Fragment) |  | 12 | 1.06 | 0.85 |
| A0A5C2GFX1 | IG c914_heavy_IGHV3-21_IGHD6-13_IGHJ4 (Fragment) |  | 2 | 1.33 | 0.84 |
| A0A5C2GG03 | IGH + IGL c101_light_IGLV1-47_IGLJ3 (Fragment) |  | 1 | 1.63 | 0.52 |
| A0A5C2GG46 | IGL c389_light_IGKV1D-39_IGKJ1 (Fragment) |  | 2 | 0.51 | 0.49 |
| A0A5C2GG66 | IG c858_heavy_IGHV3-21_IGHD5-18_IGHJ5 (Fragment) |  | 2 | 1.32 | 0.55 |
| A0A5C2GG86 | IG c359_heavy_IGHV3-30_IGHD3-22_IGHJ4 (Fragment) |  | 1 | 1.04 | 0.91 |
| A0A5C2GG87 | IGH + IGL c399_light_IGLV1-40_IGLJ1 (Fragment) |  | 1 | 1.93 | 0.49 |
| A0A5C2GGD3 | IGH + IGL c231_light_IGKV1D-33_IGKJ4 (Fragment) |  | 3 | 2.41 | 0.23 |
| A0A5C2GGE7 | IG c691_heavy_IGHV4-59B_IGHD3-9_IGHJ2 (Fragment) |  | 2 | 2.71 | 0.17 |
| A0A5C2GGG9 | IG c256_heavy_IGHV3-33_IGHD3-9_IGHJ6 (Fragment) |  | 1 | 0.52 | 0.53 |
| A0A5C2GGH5 | IG c1305_heavy_IGHV3-23_IGHD3-9_IGHJ4 (Fragment) |  | 1 | 0.29 | 0.19 |
| A0A5C2GGI7 | IGH + IGL c519_light_IGKV1-5_IGKJ4 (Fragment) |  | 2 | 0.84 | 0.68 |
| A0A5C2GGJ7 | IG c872_heavy_IGHV3-33_IGHD6-6_IGHJ5 (Fragment) |  | 5 | 1.05 | 0.91 |
| A0A5C2GGM0 | IG c55_heavy_IGHV3-48_IGHD3-10_IGHJ3 (Fragment) |  | 5 | 1.77 | 0.53 |
| A0A5C2GGP0 | IGH + IGL c589_light_IGKV1D-33_IGKJ4 (Fragment) |  | 1 | 1.05 | 0.94 |
| A0A5C2GGR9 | IG c30_heavy_IGHV3-23_IGHD2-2_IGHJ3 (Fragment) |  | 2 | 0.48 | 0.06 |
| A0A5C2GGS9 | IG c79_heavy_IGHV3-23_IGHD5-24_IGHJ5 (Fragment) |  | 1 | 3.13 | 0.07 |
| A0A5C2GGW2 | IG c515_heavy_IGHV3-23_IGHD4-17_IGHJ3 (Fragment) |  | 3 | 0.63 | 0.53 |
| A0A5C2GGW4 | IG c1246_heavy_IGHV3-30_IGHD2-21_IGHJ4 (Fragment) |  | 2 | 1.35 | 0.41 |
| A0A5C2GH46 | IG c421_heavy_IGHV3-48_IGHD1-26_IGHJ4 (Fragment) |  | 2 | 0.36 | 0.41 |
| A0A5C2GH60 | IG c544_heavy_IGHV3-7_IGHD3-3_IGHJ3 (Fragment) |  | 3 | 1.71 | 0.14 |
| A0A5C2GH64 | IG c1150_light_IGLV3-25_IGLJ3 (Fragment) |  | 3 | 0.68 | 0.63 |
| A0A5C2GH70 | IG c941_heavy_IGHV3-7_IGHD3-3_IGHJ6 (Fragment) |  | 2 | 1.06 | 0.91 |
| A0A5C2GH71 | IGH + IGL c85_heavy_IGHV4-39_IGHD6-19_IGHJ1 (Fragment) |  | 3 | 2.09 | 0.34 |
| A0A5C2GH77 | IG c1282_light_IGKV1-5_IGKJ2 (Fragment) |  | 2 | 0.72 | 0.75 |
| A0A5C2GH97 | IG c1099_heavy_IGHV3-74_IGHD3-3_IGHJ6 (Fragment) |  | 1 | 1.23 | 0.60 |
| A0A5C2GHA5 | IG c447_heavy_IGHV3-53_IGHD5-12_IGHJ2 (Fragment) |  | 1 | 2.03 | 0.20 |
| A0A5C2GHB7 | IG c677_heavy_IGHV3-9_IGHD6-13_IGHJ4 (Fragment) |  | 2 | 0.92 | 0.87 |
| A0A5C2GHD2 | IGH + IGL c145_heavy_IGHV3-15_IGHD3-10_IGHJ4 (Fragment) |  | 2 | 1.34 | 0.41 |
| A0A5C2GHH5 | IG c550_heavy_IGHV3-73_IGHD3-3_IGHJ4 (Fragment) |  | 2 | 1.70 | 0.38 |
| A0A5C2GHK7 | IG c383_heavy_IGHV5-51_IGHD3-3_IGHJ6 (Fragment) |  | 1 | 1.58 | 0.42 |
| A0A5C2GHQ0 | IG c366_light_IGLV1-44_IGLJ2 (Fragment) |  | 1 | 1.33 | 0.58 |
| A0A5C2GHR5 | IG c336_heavy_IGHV3-53_IGHD2-8_IGHJ3 (Fragment) |  | 4 | 2.20 | 0.19 |
| A0A5C2GHS8 | IGH + IGL c295_heavy_IGHV3-21_IGHD2-15_IGHJ4 (Fragment) |  | 1 | 1.46 | 0.49 |
| A0A5C2GHT7 | IG c1037_heavy_IGHV3-53_IGHD5-24_IGHJ4 (Fragment) |  | 1 | 0.91 | 0.89 |
| A0A5C2GHU1 | IG c789_heavy_IGHV1-18_IGHD3-22_IGHJ3 (Fragment) |  | 2 | 1.10 | 0.82 |
| A0A5C2GHU5 | IGH + IGL c315_heavy_IGHV3-11_IGHD3-3_IGHJ2 (Fragment) |  | 3 | 2.09 | 0.29 |
| A0A5C2GHW9 | IG c507_heavy_IGHV3-7_IGHD3-3_IGHJ4 (Fragment) |  | 5 | 1.63 | 0.20 |
| A0A5C2GHX6 | IG c1219_light_IGLV3-25_IGLJ1 (Fragment) |  | 4 | 1.06 | 0.91 |
| A0A5C2GI16 | IGH + IGL c395_heavy_IGHV3-15_IGHD4-17_IGHJ4 (Fragment) |  | 2 | 12.06 | 0.35 |
| A0A5C2GI17 | IG c341_heavy_IGHV4-39_IGHD6-6_IGHJ4 (Fragment) |  | 2 | 2.41 | 0.26 |
| A0A5C2GI26 | IG c576_light_IGLV1-47_IGLJ3 (Fragment) |  | 2 | 2.44 | 0.06 |
| A0A5C2GI81 | IG c346_heavy_IGHV4-34_IGHD3-22_IGHJ4 (Fragment) |  | 3 | 1.42 | 0.61 |
| A0A5C2GI95 | IG c494_light_IGKV1-5_IGKJ2 (Fragment) |  | 2 | 1.22 | 0.85 |
| A0A5C2GIC6 | IG c177_heavy_IGHV4-4_IGHD6-6_IGHJ4 (Fragment) |  | 3 | 1.57 | 0.29 |
| A0A5C2GIF2 | IG c198_heavy_IGHV5-51_IGHD7-27_IGHJ6 (Fragment) |  | 2 | 1.29 | 0.46 |
| A0A5C2GII4 | IG c1174_heavy_IGHV1-18_IGHD4-17_IGHJ4 (Fragment) |  | 2 | 1.58 | 0.56 |
| A0A5C2GIJ0 | IG c818_light_IGKV1D-33_IGKJ4 (Fragment) |  | 1 | 1.61 | 0.52 |
| A0A5C2GIK6 | IG c1053_heavy_IGHV3-11_IGHD5-18_IGHJ4 (Fragment) |  | 1 | 0.40 | 0.30 |
| A0A5C2GIN0 | IG c1181_light_IGKV3-20_IGKJ3 (Fragment) |  | 1 | 2.40 | 0.06 |
| A0A5C2GIN4 | IG c949_heavy_IGHV4-39_IGHD3-10_IGHJ4 (Fragment) |  | 1 | 3.02 | 0.40 |
| A0A5C2GIP2 | IG c31_light_IGLV2-14_IGLJ1 (Fragment) |  | 8 | 2.34 | 0.23 |
| A0A5C2GIR5 | IG c1113_light_IGKV3-20_IGKJ4 (Fragment) |  | 5 | 7.84 | 0.19 |
| A0A5C2GIR6 | IGH + IGL c595_heavy_IGHV3-72_IGHD5-18_IGHJ4 (Fragment) |  | 1 | 1.72 | 0.07 |
| A0A5C2GIT4 | IG c17_heavy_IGHV5-51_IGHD5-12_IGHJ6 (Fragment) |  | 2 | 1.49 | 0.66 |
| A0A5C2GIT5 | IG c402_heavy_IGHV3-21_IGHD2-15_IGHJ1 (Fragment) |  | 4 | 1.12 | 0.74 |
| A0A5C2GIV6 | IG c452_heavy_IGHV5-51_IGHD7-27_IGHJ6 (Fragment) |  | 1 | 0.67 | 0.66 |
| A0A5C2GIV9 | IG c1007_heavy_IGHV3-21_IGHD2-2_IGHJ6 (Fragment) |  | 3 | 1.25 | 0.61 |
| A0A5C2GIW2 | IG c796_light_IGKV3-15_IGKJ2 (Fragment) |  | 8 | 3.28 | 0.14 |
| A0A5C2GIX7 | IG c873_light_IGLV3-25_IGLJ1 (Fragment) |  | 3 | 1.53 | 0.51 |
| A0A5C2GIZ5 | IG c1308_heavy_IGHV5-51_IGHD3-22_IGHJ4 (Fragment) |  | 8 | 0.97 | 0.95 |
| A0A5C2GJ22 | IG c699_heavy_IGHV3-23_IGHD3-10_IGHJ4 (Fragment) |  | 2 | 0.96 | 0.96 |
| A0A5C2GJ23 | IG c428_light_IGKV2-30_IGKJ2 (Fragment) |  | 2 | 14.23 | 0.12 |
| A0A5C2GJ27 | IG c158_heavy_IGHV5-51_IGHD4-23_IGHJ5 (Fragment) |  | 2 | 1.45 | 0.21 |
| A0A5C2GJ30 | IG c883_heavy_IGHV3-23_IGHD7-27_IGHJ4 (Fragment) |  | 1 | 1.62 | 0.36 |
| A0A5C2GJ35 | IG c883_light_IGKV1-16_IGKJ4 (Fragment) |  | 5 | 0.54 | 0.07 |
| A0A5C2GJ89 | IG c995_light_IGKV3-11_IGKJ4 (Fragment) |  | 3 | 0.69 | 0.49 |
| A0A5C2GJA2 | IG c484_light_IGLV3-9_IGLJ3 (Fragment) |  | 3 | 2.09 | 0.15 |
| A0A5C2GJH6 | IG c913_light_IGKV3-20_IGKJ2 (Fragment) |  | 1 | 1.67 | 0.36 |
| A0A5C2GJH7 | IGH + IGL c157_light_IGLV1-51_IGLJ3 (Fragment) |  | 2 | 2.98 | 0.19 |
| A0A5C2GJK5 | IG c281_light_IGKV3-15_IGKJ4 (Fragment) |  | 3 | 1.54 | 0.57 |
| A0A5C2GJK9 | IG c95_heavy_IGHV3-23_IGHD6-25_IGHJ4 (Fragment) |  | 1 | 0.80 | 0.71 |
| A0A5C2GJN9 | IG c314_light_IGKV1-12_IGKJ1 (Fragment) |  | 1 | 1.49 | 0.30 |
| A0A5C2GJP9 | IG c1141_heavy_IGHV3-49_IGHD3-10_IGHJ6 (Fragment) |  | 2 | 0.69 | 0.31 |
| A0A5C2GJQ5 | IG c477_light_IGLV1-40_IGLJ3 (Fragment) |  | 2 | 3.02 | 0.17 |
| A0A5C2GJR5 | IG c837_light_IGKV1-39_IGKJ2 (Fragment) |  | 5 | 1.71 | 0.60 |
| A0A5C2GJT2 | IG c1158_heavy_IGHV3-64_IGHD2-2_IGHJ4 (Fragment) |  | 3 | 1.45 | 0.49 |
| A0A5C2GJW4 | IG c1105_light_IGLV8-61_IGLJ2 (Fragment) |  | 3 | 3.83 | 0.10 |
| A0A5C2GK01 | IG c1003_heavy_IGHV3-30_IGHD5-12_IGHJ6 (Fragment) |  | 1 | 1.80 | 0.16 |
| A0A5C2GK12 | IG c1202_heavy_IGHV3-9_IGHD1-7_IGHJ3 (Fragment) |  | 2 | 1.87 | 0.30 |
| A0A5C2GK68 | IG c744_light_IGLV1-51_IGLJ2 (Fragment) |  | 1 | 2.14 | 0.15 |
| A0A5C2GK73 | IG c472_heavy_IGHV4-34_IGHD1-20_IGHJ4 (Fragment) |  | 1 | 2.12 | 0.30 |
| A0A5C2GK96 | IG c423_light_IGKV4-1_IGKJ2 (Fragment) |  | 1 | 2.52 | 0.27 |
| A0A5C2GKB5 | IG c928_light_IGKV3-20_IGKJ1 (Fragment) |  | 3 | 0.38 | 0.21 |
| A0A5C2GKD9 | IG c15_heavy_IGHV3-74_IGHD3-9_IGHJ4 (Fragment) |  | 3 | 1.01 | 0.99 |
| A0A5C2GKG3 | IG c273_light_IGKV1-6_IGKJ1 (Fragment) |  | 1 | 1.18 | 0.55 |
| A0A5C2GKH6 | IG c1226_heavy_IGHV3-53_IGHD5-12_IGHJ4 (Fragment) |  | 1 | 1.81 | 0.22 |
| A0A5C2GKJ7 | IG c881_light_IGLV2-11_IGLJ3 (Fragment) |  | 2 | 2.00 | 0.31 |
| A0A5C2GKN5 | IG c369_heavy_IGHV3-74_IGHD1-26_IGHJ4 (Fragment) |  | 1 | 3.97 | 0.06 |
| A0A5C2GKP3 | IG c125_heavy_IGHV3-7_IGHD3-3_IGHJ3 (Fragment) |  | 2 | 2.75 | 0.50 |
| A0A5C2GKQ6 | IG c85_heavy_IGHV3-9_IGHD6-19_IGHJ6 (Fragment) |  | 1 | 1.94 | 0.41 |
| A0A5C2GKQ7 | IG c447_light_IGLV3-21_IGLJ3 (Fragment) |  | 2 | 2.97 | 0.11 |
| A0A5C2GKT0 | IG c944_light_IGKV1-5_IGKJ1 (Fragment) |  | 2 | 2.15 | 0.26 |
| A0A5C2GKT6 | IG c513_heavy_IGHV4-31_IGHD5-24_IGHJ2 (Fragment) |  | 2 | 3.44 | 0.14 |
| A0A5C2GKU9 | IG c56_light_IGKV4-1_IGKJ2 (Fragment) |  | 2 | 2.19 | 0.23 |
| A0A5C2GL28 | IG c26_heavy_IGHV3-7_IGHD6-13_IGHJ4 (Fragment) |  | 4 | 0.64 | 0.42 |
| A0A5C2GL66 | IG c272_heavy_IGHV3-48_IGHD2-15_IGHJ6 (Fragment) |  | 1 | 0.85 | 0.76 |
| A0A5C2GL83 | IG c76_heavy_IGHV6-1_IGHD1-1_IGHJ3 (Fragment) |  | 4 | 1.61 | 0.18 |
| A0A5C2GL85 | IG c1069_light_IGKV3-20_IGKJ2 (Fragment) |  | 2 | 2.18 | 0.64 |
| A0A5C2GL87 | IG c1157_light_IGKV3-20_IGKJ2 (Fragment) |  | 3 | 0.36 | 0.63 |
| A0A5C2GLB9 | IG c824_light_IGLV1-44_IGLJ2 (Fragment) |  | 1 | 1.08 | 0.89 |
| A0A5C2GLK7 | IG c58_heavy_IGHV3-23_IGHD5-18_IGHJ4 (Fragment) |  | 5 | 1.22 | 0.53 |
| A0A5C2GLL4 | IG c226_heavy_IGHV3-23_IGHD5-24_IGHJ4 (Fragment) |  | 2 | 1.66 | 0.16 |
| A0A5C2GLL7 | IG c375_light_IGKV4-1_IGKJ3 (Fragment) |  | 1 | 1.77 | 0.67 |
| A0A5C2GLM0 | IG c402_heavy_IGHV3-21_IGHD3-10_IGHJ6 (Fragment) |  | 3 | 1.37 | 0.65 |
| A0A5C2GLP0 | IG c606_light_IGKV3-20_IGKJ4 (Fragment) |  | 2 | 0.79 | 0.48 |
| A0A5C2GLP6 | IG c465_heavy_IGHV3-49_IGHD3-22_IGHJ5 (Fragment) |  | 1 | 0.54 | 0.06 |
| A0A5C2GLU4 | IG c316_heavy_IGHV3-7_IGHD5-18_IGHJ4 (Fragment) |  | 1 | 1.21 | 0.59 |
| A0A5C2GLW1 | IG c336_heavy_IGHV3-72_IGHD7-27_IGHJ3 (Fragment) |  | 5 | 1.93 | 0.35 |
| A0A5C2GLW6 | IG c505_heavy_IGHV4-34_IGHD1-26_IGHJ6 (Fragment) |  | 2 | 1.56 | 0.65 |
| A0A5C2GLX2 | IG c107_light_IGLV2-11_IGLJ1 (Fragment) |  | 1 | 2.38 | 0.30 |
| A0A5C2GLY3 | IG c366_heavy_IGHV3-7_IGHD1-26_IGHJ4 (Fragment) |  | 4 | 1.32 | 0.66 |
| A0A5C2GLZ3 | IG c1022_heavy_IGHV1-2_IGHD3-16_IGHJ6 (Fragment) |  | 1 | 0.98 | 0.96 |
| A0A5C2GM19 | IG c228_heavy_IGHV3-48_IGHD1-7_IGHJ3 (Fragment) |  | 1 | 1.56 | 0.36 |
| A0A5C2GM37 | IG c1221_light_IGKV3-20_IGKJ2 (Fragment) |  | 5 | 1.17 | 0.65 |
| A0A5C2GM54 | IG c595_heavy_IGHV5-51_IGHD2-2_IGHJ4 (Fragment) |  | 9 | 1.56 | 0.48 |
| A0A5C2GM64 | IG c692_light_IGKV4-1_IGKJ1 (Fragment) |  | 3 | 2.66 | 0.16 |
| A0A5C2GM65 | IG c231_light_IGLV1-47_IGLJ2 (Fragment) |  | 3 | 0.69 | 0.46 |
| A0A5C2GMA0 | IG c1322_light_IGKV1D-39_IGKJ1 (Fragment) |  | 2 | 4.77 | 0.21 |
| A0A5C2GMA1 | IG c1071_light_IGKV1-5_IGKJ2 (Fragment) |  | 1 | 3.11 | 0.08 |
| A0A5C2GMA5 | IG c582_heavy_IGHV3-74_IGHD3-16_IGHJ5 (Fragment) |  | 4 | 1.26 | 0.56 |
| A0A5C2GMC2 | IG c610_light_IGKV3-20_IGKJ3 (Fragment) |  | 1 | 2.02 | 0.11 |
| A0A5C2GMD1 | IG c848_light_IGKV1-5_IGKJ4 (Fragment) |  | 1 | 2.10 | 0.18 |
| A0A5C2GMD4 | IG c3_heavy_IGHV3-48_IGHD3-16_IGHJ4 (Fragment) |  | 6 | 1.53 | 0.10 |
| A0A5C2GME8 | IG c526_heavy_IGHV3-49_IGHD3-10_IGHJ4 (Fragment) |  | 1 | 0.45 | 0.15 |
| A0A5C2GMF3 | IG c607_heavy_IGHV3-11_IGHD1-7_IGHJ4 (Fragment) |  | 1 | 1.64 | 0.49 |
| A0A5C2GMI7 | IG c992_light_IGKV4-1_IGKJ4 (Fragment) |  | 1 | 2.31 | 0.18 |
| A0A5C2GML0 | IG c775_heavy_IGHV3-15_IGHD3-10_IGHJ4 (Fragment) |  | 4 | 2.88 | 0.35 |
| A0A5C2GML1 | IG c428_heavy_IGHV3-72_IGHD3-3_IGHJ6 (Fragment) |  | 2 | 1.54 | 0.31 |
| A0A5C2GMS9 | IG c1318_light_IGKV3-20_IGKJ2 (Fragment) |  | 1 | 1.90 | 0.32 |
| A0A5C2GMU4 | IG c898_light_IGLV6-57_IGLJ3 (Fragment) |  | 2 | 1.27 | 0.71 |
| A0A5C2GMU5 | IG c1208_light_IGKV3-20_IGKJ1 (Fragment) |  | 1 | 1.35 | 0.31 |
| A0A5C2GN16 | IG c568_heavy_IGHV4-59B_IGHD6-13_IGHJ4 (Fragment) |  | 2 | 3.27 | 0.06 |
| A0A5C2GN22 | IG c180_light_IGKV3-20_IGKJ3 (Fragment) |  | 2 | 1.44 | 0.48 |
| A0A5C2GN85 | IG c1200_light_IGKV2D-28_IGKJ5 (Fragment) |  | 1 | 3.13 | 0.16 |
| A0A5C2GNA4 | IG c362_light_IGKV1-5_IGKJ1 (Fragment) |  | 7 | 1.50 | 0.38 |
| A0A5C2GNA6 | IG c658_heavy_IGHV3-53_IGHD5-24_IGHJ4 (Fragment) |  | 1 | 1.62 | 0.26 |
| A0A5C2GNB0 | IG c1181_heavy_IGHV3-30_IGHD3-10_IGHJ6 (Fragment) |  | 2 | 1.88 | 0.39 |
| A0A5C2GNC4 | IG c742_light_IGKV1-5_IGKJ1 (Fragment) |  | 3 | 1.66 | 0.44 |
| A0A5C2GNF9 | IG c90_light_IGKV3-11_IGKJ5 (Fragment) |  | 3 | 2.10 | 0.17 |
| A0A5C2GNH2 | IG c876_heavy_IGHV4-34_IGHD2-2_IGHJ4 (Fragment) |  | 1 | 5.31 | 0.06 |
| A0A5C2GNI0 | IG c886_heavy_IGHV4-4_IGHD1-7_IGHJ6 (Fragment) |  | 1 | 2.65 | 0.44 |
| A0A5C2GNM0 | IG c1009_light_IGLV4-69_IGLJ2 (Fragment) |  | 4 | 134.45 | 0.27 |
| A0A5C2GNN4 | IG c150_heavy_IGHV3-48_IGHD1-26_IGHJ3 (Fragment) |  | 2 | 1.30 | 0.67 |
| A0A5C2GNP9 | IG c521_heavy_IGHV3-48_IGHD3-22_IGHJ3 (Fragment) |  | 2 | 1.67 | 0.23 |
| A0A5C2GNS1 | IG c463_heavy_IGHV3-49_IGHD3-10_IGHJ5 (Fragment) |  | 1 | 1.69 | 0.44 |
| A0A5C2GNT5 | IG c10_light_IGKV3-11_IGKJ1 (Fragment) |  | 3 | 1.20 | 0.58 |
| A0A5C2GNU3 | IG c227_heavy_IGHV3-53_IGHD3-10_IGHJ4 (Fragment) |  | 5 | 2.27 | 0.15 |
| A0A5C2GNX4 | IG c870_heavy_IGHV3-66_IGHD3-16_IGHJ1 (Fragment) |  | 2 | 3.56 | 0.09 |
| A0A5C2GNY9 | IG c270_heavy_IGHV3-7_IGHD3-10_IGHJ3 (Fragment) |  | 1 | 1.15 | 0.73 |
| A0A5C2GNZ7 | IG c280_heavy_IGHV3-23_IGHD2-21_IGHJ2 (Fragment) |  | 1 | 1.14 | 0.75 |
| A0A5C2GP05 | IG c958_heavy_IGHV4-31_IGHD3-3_IGHJ4 (Fragment) |  | 2 | 1.58 | 0.49 |
| A0A5C2GP13 | IG c38_heavy_IGHV3-74_IGHD2-15_IGHJ4 (Fragment) |  | 2 | 0.50 | 0.29 |
| A0A5C2GP29 | IG c1293_heavy_IGHV3-74_IGHD5-18_IGHJ6 (Fragment) |  | 3 | 2.46 | 0.10 |
| A0A5C2GP32 | IG c434_heavy_IGHV3-48_IGHD2-15_IGHJ5 (Fragment) |  | 3 | 1.42 | 0.54 |
| A0A5C2GP67 | IG c633_heavy_IGHV3-21_IGHD6-19_IGHJ6 (Fragment) |  | 1 | 1.02 | 0.96 |
| A0A5C2GPA3 | IG c650_heavy_IGHV4-34_IGHD6-13_IGHJ4 (Fragment) |  | 1 | 1.38 | 0.59 |
| A0A5C2GPA8 | IG c673_heavy_IGHV3-33_IGHD2-8_IGHJ4 (Fragment) |  | 4 | 1.09 | 0.83 |
| A0A5C2GPB7 | IG c534_heavy_IGHV3-53_IGHD3-3_IGHJ4 (Fragment) |  | 2 | 2.06 | 0.24 |
| A0A5C2GPB9 | IG c1156_light_IGLV6-57_IGLJ2 (Fragment) |  | 7 | 1.38 | 0.42 |
| A0A5C2GPC0 | IG c1235_heavy_IGHV3-74_IGHD2-8_IGHJ6 (Fragment) |  | 2 | 1.30 | 0.43 |
| A0A5C2GPD5 | IG c430_heavy_IGHV3-23_IGHD4-17_IGHJ2 (Fragment) |  | 1 | 4.47 | 0.26 |
| A0A5C2GPE7 | IG c440_heavy_IGHV3-49_IGHD3-22_IGHJ4 (Fragment) |  | 2 | 1.21 | 0.55 |
| A0A5C2GPH1 | IG c584_heavy_IGHV1-18_IGHD3-10_IGHJ4 (Fragment) |  | 2 | 0.57 | 0.05 |
| A0A5C2GPK3 | IG c1040_light_IGKV1-6_IGKJ1 (Fragment) |  | 13 | 3.22 | 0.14 |
| A0A5C2GPL7 | IG c1326_heavy_IGHV3-49_IGHD2-15_IGHJ4 (Fragment) |  | 3 | 1.52 | 0.44 |
| A0A5C2GPN1 | IG c1355_heavy_IGHV4-4_IGHD2-2_IGHJ1 (Fragment) |  | 2 | 0.76 | 0.52 |
| A0A5C2GPQ1 | IG c843_heavy_IGHV3-49_IGHD3-3_IGHJ6 (Fragment) |  | 2 | 0.86 | 0.75 |
| A0A5C2GPS6 | IG c873_heavy_IGHV3-23_IGHD5-24_IGHJ4 (Fragment) |  | 2 | 1.80 | 0.42 |
| A0A5C2GPW1 | IG c620_heavy_IGHV3-30_IGHD3-22_IGHJ4 (Fragment) |  | 1 | 1.00 | 0.99 |
| A0A5C2GQ05 | IG c1476_heavy_IGHV3-7_IGHD4-11_IGHJ4 (Fragment) |  | 6 | 1.45 | 0.43 |
| A0A5C2GQ34 | IG c49_heavy_IGHV3-9_IGHD3-22_IGHJ1 (Fragment) |  | 4 | 1.05 | 0.80 |
| A0A5C2GQ55 | IG c1526_heavy_IGHV3-7_IGHD3-3_IGHJ4 (Fragment) |  | 4 | 1.73 | 0.42 |
| A0A5C2GQB1 | IG c1522_heavy_IGHV3-53_IGHD2-21_IGHJ4 (Fragment) |  | 2 | 0.20 | 0.26 |
| A0A5C2GQC4 | IG c1161_heavy_IGHV5-51_IGHD3-3_IGHJ4 (Fragment) |  | 2 | 1.53 | 0.45 |
| A0A5C2GQJ2 | IG c1328_light_IGLV2-14_IGLJ2 (Fragment) |  | 1 | 0.75 | 0.75 |
| A0A5C2GQJ7 | IG c1173_heavy_IGHV3-23_IGHD3-3_IGHJ6 (Fragment) |  | 3 | 1.19 | 0.58 |
| A0A5C2GQV6 | IG c920_heavy_IGHV3-74_IGHD7-27_IGHJ2 (Fragment) |  | 4 | 1.15 | 0.61 |
| A0A5C2GQX0 | IG c1608_heavy_IGHV3-33_IGHD3-9_IGHJ4 (Fragment) |  | 2 | 0.23 | 0.10 |
| A0A5C2GQY8 | IG c1752_heavy_IGHV3-23_IGHD3-10_IGHJ4 (Fragment) |  | 2 | 0.84 | 0.90 |
| A0A5C2GR18 | IG c1782_heavy_IGHV1-46_IGHD1-7_IGHJ3 (Fragment) |  | 2 | 2.28 | 0.19 |
| A0A5C2GR38 | IG c1184_heavy_IGHV3-66_IGHD3-22_IGHJ3 (Fragment) |  | 3 | 1.68 | 0.17 |
| A0A5C2GR58 | IG c1383_heavy_IGHV3-7_IGHD3-22_IGHJ5 (Fragment) |  | 4 | 1.65 | 0.51 |
| A0A5C2GR64 | IG c1403_heavy_IGHV3-15_IGHD3-16_IGHJ4 (Fragment) |  | 1 | 1.85 | 0.32 |
| A0A5C2GR94 | IG c4_light_IGKV3-20_IGKJ3 (Fragment) |  | 2 | 1.31 | 0.62 |
| A0A5C2GRB6 | IG c429_heavy_IGHV1-46_IGHD4-17_IGHJ1 (Fragment) |  | 1 | 0.98 | 0.94 |
| A0A5C2GRD1 | IG c1274_heavy_IGHV3-33_IGHD6-19_IGHJ4 (Fragment) |  | 1 | 1.33 | 0.30 |
| A0A5C2GRF6 | IG c1110_heavy_IGHV5-51_IGHD6-6_IGHJ4 (Fragment) |  | 2 | 1.92 | 0.14 |
| A0A5C2GRG2 | IG c1304_heavy_IGHV3-7_IGHD3-3_IGHJ3 (Fragment) |  | 1 | 1.26 | 0.38 |
| A0A5C2GRH5 | IG c622_light_IGKV2D-29_IGKJ4 (Fragment) |  | 2 | 1.32 | 0.69 |
| A0A5C2GRM8 | IG c1364_heavy_IGHV3-66_IGHD3-3_IGHJ4 (Fragment) |  | 3 | 0.85 | 0.47 |
| A0A5C2GRN5 | IG c71_light_IGKV1D-13_IGKJ3 (Fragment) |  | 2 | 4.20 | 0.19 |
| A0A5C2GRN8 | IG c1374_heavy_IGHV3-48_IGHD5-12_IGHJ4 (Fragment) |  | 3 | 2.02 | 0.24 |
| A0A5C2GRP9 | IG c1563_heavy_IGHV3-73_IGHD2-15_IGHJ4 (Fragment) |  | 3 | 3.09 | 0.23 |
| A0A5C2GRQ1 | IG c559_heavy_IGHV3-53_IGHD3-9_IGHJ2 (Fragment) |  | 1 | 1.57 | 0.35 |
| A0A5C2GRQ2 | IG c500_light_IGKV1-5_IGKJ2 (Fragment) |  | 1 | 1.85 | 0.20 |
| A0A5C2GRQ8 | IG c1210_heavy_IGHV3-33_IGHD1-7_IGHJ6 (Fragment) |  | 1 | 1.06 | 0.87 |
| A0A5C2GRS5 | IG c165_light_IGKV1D-33_IGKJ4 (Fragment) |  | 1 | 1.39 | 0.13 |
| A0A5C2GRT4 | IG c599_heavy_IGHV3-53_IGHD4-4_IGHJ4 (Fragment) |  | 1 | 2.23 | 0.10 |
| A0A5C2GRU1 | IG c224_light_IGKV4-1_IGKJ1 (Fragment) |  | 2 | 2.36 | 0.23 |
| A0A5C2GRW6 | IG c264_light_IGLV3-21_IGLJ1 (Fragment) |  | 1 | 1.85 | 0.21 |
| A0A5C2GRY5 | IG c284_light_IGKV3-20_IGKJ1 (Fragment) |  | 1 | 1.74 | 0.20 |
| A0A5C2GS20 | IG c171_light_IGKV2D-29_IGKJ3 (Fragment) |  | 1 | 1.36 | 0.22 |
| A0A5C2GS92 | IG c301_light_IGLV6-57_IGLJ2 (Fragment) |  | 1 | 1.19 | 0.80 |
| A0A5C2GSB5 | IG c551_heavy_IGHV3-7_IGHD3-10_IGHJ6 (Fragment) |  | 2 | 2.00 | 0.09 |
| A0A5C2GSC8 | IG c281_light_IGKV1-9_IGKJ5 (Fragment) |  | 1 | 1.83 | 0.40 |
| A0A5C2GSD7 | IG c291_light_IGLV1-40_IGLJ2 (Fragment) |  | 2 | 3.68 | 0.20 |
| A0A5C2GSD9 | IG c227_light_IGLV3-25_IGLJ3 (Fragment) |  | 7 | 1.92 | 0.26 |
| A0A5C2GSG9 | IG c341_light_IGLV6-57_IGLJ3 (Fragment) |  | 2 | 2.28 | 0.36 |
| A0A5C2GSJ8 | IG c1664_heavy_IGHV5-51_IGHD5-5_IGHJ6 (Fragment) |  | 1 | 1.23 | 0.70 |
| A0A5C2GSJ9 | IG c769_heavy_IGHV3-23_IGHD6-19_IGHJ3 (Fragment) |  | 3 | 1.48 | 0.50 |
| A0A5C2GSP8 | IG c1510_heavy_IGHV3-7_IGHD5-12_IGHJ4 (Fragment) |  | 3 | 1.67 | 0.69 |
| A0A5C2GSQ5 | IG c829_heavy_IGHV3-9_IGHD6-13_IGHJ4 (Fragment) |  | 3 | 1.80 | 0.28 |
| A0A5C2GSZ9 | IG c939_heavy_IGHV3-21_IGHD7-27_IGHJ3 (Fragment) |  | 3 | 5.99 | 0.33 |
| A0A5C2GT12 | IG c1844_heavy_IGHV3-23_IGHD3-22_IGHJ2 (Fragment) |  | 4 | 1.40 | 0.38 |
| A0A5C2GT15 | IG c681_heavy_IGHV3-21_IGHD3-9_IGHJ4 (Fragment) |  | 4 | 1.44 | 0.48 |
| A0A5C2GT23 | IG c1239_light_IGLV6-57_IGLJ2 (Fragment) |  | 2 | 7.49 | 0.29 |
| A0A5C2GT38 | IG c989_heavy_IGHV3-13_IGHD6-6_IGHJ2 (Fragment) |  | 1 | 0.42 | 0.38 |
| A0A5C2GT62 | IG c1690_heavy_IGHV3-21_IGHD5-18_IGHJ6 (Fragment) |  | 3 | 2.43 | 0.23 |
| A0A5C2GT92 | IG c1884_heavy_IGHV3-23_IGHD3-10_IGHJ4 (Fragment) |  | 2 | 1.39 | 0.45 |
| A0A5C2GTB5 | IG c1079_heavy_IGHV5-51_IGHD4-23_IGHJ4 (Fragment) |  | 2 | 0.66 | 0.63 |
| A0A5C2GTE2 | IG c617_light_IGKV3-15_IGKJ5 (Fragment) |  | 1 | 2.50 | 0.16 |
| A0A5C2GTE8 | IG c791_heavy_IGHV3-9_IGHD3-10_IGHJ3 (Fragment) |  | 5 | 1.30 | 0.47 |
| A0A5C2GTG7 | IG c1800_heavy_IGHV3-23_IGHD1-26_IGHJ3 (Fragment) |  | 3 | 0.78 | 0.60 |
| A0A5C2GTI8 | IG c784_light_IGKV1D-13_IGKJ4 (Fragment) |  | 2 | 1.38 | 0.67 |
| A0A5C2GTK2 | IG c322_light_IGKV3-20_IGKJ5 (Fragment) |  | 2 | 2.53 | 0.27 |
| A0A5C2GTL3 | IG c1056_light_IGKV3-20_IGKJ1 (Fragment) |  | 1 | 1.77 | 0.26 |
| A0A5C2GTP5 | IG c1229_heavy_IGHV3-21_IGHD6-19_IGHJ6 (Fragment) |  | 2 | 1.43 | 0.48 |
| A0A5C2GTT7 | IG c925_light_IGKV4-1_IGKJ2 (Fragment) |  | 7 | 1.26 | 0.60 |
| A0A5C2GTW8 | IG c1319_heavy_IGHV3-11_IGHD1-14_IGHJ4 (Fragment) |  | 1 | 1.17 | 0.77 |
| A0A5C2GU73 | IG c857_light_IGLV3-21_IGLJ2 (Fragment) |  | 4 | 1.33 | 0.57 |
| A0A5C2GUD6 | IG c1134_light_IGKV3-15_IGKJ1 (Fragment) |  | 1 | 3.14 | 0.25 |
| A0A5C2GUK7 | IG c1007_light_IGKV3-20_IGKJ3 (Fragment) |  | 3 | 1.07 | 0.77 |
| A0A5C2GUL4 | IG c1215_light_IGKV3-15_IGKJ2 (Fragment) |  | 3 | 2.24 | 0.19 |
| A0A5C2GUS4 | IG c1284_light_IGKV4-1_IGKJ5 (Fragment) |  | 3 | 1.18 | 0.58 |
| A0A5C2GUT1 | IG c1271_heavy_IGHV3-33_IGHD1-1_IGHJ4 (Fragment) |  | 1 | 0.57 | 0.07 |
| A0A5C2GUT4 | IG c1191_light_IGKV1-33_IGKJ2 (Fragment) |  | 1 | 2.19 | 0.30 |
| A0A5C2GUV3 | IG c1589_heavy_IGHV3-48_IGHD2-2_IGHJ4 (Fragment) |  | 1 | 1.56 | 0.35 |
| A0A5C2GUV5 | IG c297_heavy_IGHV3-33_IGHD3-16_IGHJ6 (Fragment) |  | 2 | 0.57 | 0.56 |
| A0A5C2GUX6 | IG c389_light_IGKV3-11_IGKJ1 (Fragment) |  | 3 | 2.53 | 0.27 |
| A0A5C2GUY4 | IG c1345_light_IGKV1-5_IGKJ1 (Fragment) |  | 3 | 1.00 | 1.00 |
| A0A5C2GV14 | IG c1384_light_IGKV3-11_IGKJ4 (Fragment) |  | 5 | 2.49 | 0.20 |
| A0A5C2GV75 | IG c1361_heavy_IGHV3-7_IGHD3-3_IGHJ4 (Fragment) |  | 2 | 1.69 | 0.51 |
| A0A5C2GV81 | IG c1689_heavy_IGHV3-23_IGHD5-18_IGHJ4 (Fragment) |  | 2 | 1.45 | 0.16 |
| A0A5C2GV93 | IG c1485_light_IGLV3-25_IGLJ2 (Fragment) |  | 2 | 1.88 | 0.25 |
| A0A5C2GV99 | IG c1391_heavy_IGHV1-2_IGHD3-3_IGHJ4 (Fragment) |  | 2 | 1.25 | 0.68 |
| A0A5C2GVA0 | IG c1247_light_IGKV1D-13_IGKJ4 (Fragment) |  | 1 | 1.81 | 0.14 |
| A0A5C2GVA7 | IG c792_light_IGKV1-5_IGKJ2 (Fragment) |  | 1 | 1.16 | 0.83 |
| A0A5C2GVB5 | IG c487_heavy_IGHV3-48_IGHD4-4_IGHJ6 (Fragment) |  | 3 | 1.58 | 0.42 |
| A0A5C2GVE2 | IG c1534_light_IGKV3-20_IGKJ2 (Fragment) |  | 4 | 1.18 | 0.39 |
| A0A5C2GVE4 | IG c1739_heavy_IGHV3-21_IGHD3-9_IGHJ5 (Fragment) |  | 2 | 0.58 | 0.47 |
| A0A5C2GVE5 | IG c517_heavy_IGHV1-8_IGHD3-16_IGHJ5 (Fragment) |  | 1 | 1.22 | 0.46 |
| A0A5C2GVM3 | IG c846_light_IGKV3-20_IGKJ4 (Fragment) |  | 2 | 3.50 | 0.09 |
| A0A5C2GVN7 | IG c1635_light_IGLV4-69_IGLJ2 (Fragment) |  | 2 | 3.87 | 0.23 |
| A0A5C2GVP0 | IG c1551_heavy_IGHV3-48_IGHD1-1_IGHJ5 (Fragment) |  | 3 | 0.40 | 0.29 |
| A0A5C2GVP3 | IG c617_heavy_IGHV3-7_IGHD6-19_IGHJ3 (Fragment) |  | 2 | 0.83 | 0.79 |
| A0A5C2GVT0 | IG c1601_heavy_IGHV3-74_IGHD1-7_IGHJ2 (Fragment) |  | 2 | 13.47 | 0.23 |
| A0A5C2GVT8 | IG c1695_light_IGLV1-47_IGLJ2 (Fragment) |  | 4 | 1.06 | 0.94 |
| A0A5C2GVU0 | IG c552_heavy_IGHV3-7_IGHD4-23_IGHJ4 (Fragment) |  | 2 | 1.04 | 0.96 |
| A0A5C2GVU1 | IG c1453_light_IGKV3-11_IGKJ5 (Fragment) |  | 1 | 2.02 | 0.34 |
| A0A5C2GVU8 | IG c677_heavy_IGHV5-51_IGHD3-22_IGHJ4 (Fragment) |  | 2 | 1.66 | 0.25 |
| A0A5C2GVX4 | IG c1735_light_IGKV3-20_IGKJ2 (Fragment) |  | 1 | 1.48 | 0.40 |
| A0A5C2GVY9 | IG c1611_light_IGLV1-40_IGLJ2 (Fragment) |  | 1 | 2.64 | 0.08 |
| A0A5C2GW00 | IG c1033_light_IGKV4-1_IGKJ2 (Fragment) |  | 2 | 1.49 | 0.42 |
| A0A5C2GW09 | IG c1641_light_IGKV1-6_IGKJ4 (Fragment) |  | 2 | 3.83 | 0.21 |
| A0A5C2GW95 | IG c1845_light_IGLV1-47_IGLJ3 (Fragment) |  | 2 | 1.89 | 0.27 |
| A0A5C2GWC4 | IG c1213_light_IGKV3-20_IGKJ2 (Fragment) |  | 2 | 1.00 | 1.00 |
| A0A5C2GWF1 | IG c887_heavy_IGHV4-34_IGHD4-17_IGHJ4 (Fragment) |  | 1 | 0.55 | 0.12 |
| A0A5C2GWG0 | IG c1473_light_IGKV4-1_IGKJ3 (Fragment) |  | 1 | 2.69 | 0.20 |
| A0A5C2GWH0 | IG c907_heavy_IGHV3-9_IGHD6-19_IGHJ4 (Fragment) |  | 2 | 0.71 | 0.63 |
| A0A5C2GWJ5 | IG c30_light_IGKV3-20_IGKJ2 (Fragment) |  | 2 | 1.55 | 0.16 |
| A0A5C2GWQ8 | IG c1657_light_IGLV1-51_IGLJ2 (Fragment) |  | 1 | 1.69 | 0.46 |
| A0A5C2GWU4 | IG c1292_light_IGKV1-12_IGKJ3 (Fragment) |  | 3 | 1.90 | 0.22 |
| A0A5C2GX34 | IG c240_light_IGLV2-14_IGLJ2 (Fragment) |  | 4 | 1.82 | 0.28 |
| A0A5C2GX61 | IG c1402_light_IGKV3-11_IGKJ5 (Fragment) |  | 1 | 1.56 | 0.34 |
| A0A5C2GX83 | IG c1039_light_IGKV4-1_IGKJ2 (Fragment) |  | 3 | 2.21 | 0.22 |
| A0A5C2GXA1 | IG c1583_light_IGKV2D-28_IGKJ2 (Fragment) |  | 4 | 1.84 | 0.28 |
| A0A5C2GXB2 | IG c1079_light_IGKV3-20_IGKJ2 (Fragment) |  | 2 | 5.88 | 0.11 |
| A0A5C2GXC2 | IG c1247_heavy_IGHV1-69_IGHD1-1_IGHJ6 (Fragment) |  | 5 | 1.82 | 0.23 |
| A0A5C2GXV0 | IG c1209_light_IGKV3-20_IGKJ4 (Fragment) |  | 1 | 1.90 | 0.50 |
| A0A5C2GXV5 | IG c1447_heavy_IGHV3-15_IGHD3-3_IGHJ5 (Fragment) |  | 2 | 2.04 | 0.30 |
| A0A5C2GXV9 | IG c478_light_IGKV1D-13_IGKJ4 (Fragment) |  | 2 | 4.03 | 0.22 |
| A0A5C2GXY4 | IG c1612_light_IGLV1-47_IGLJ2 (Fragment) |  | 1 | 2.54 | 0.36 |
| A0A5C2GY12 | IG c538_light_IGLV6-57_IGLJ3 (Fragment) |  | 3 | 1.83 | 0.26 |
| A0A5C2GY47 | IG c1537_heavy_IGHV3-48_IGHD1-26_IGHJ4 (Fragment) |  | 3 | 2.86 | 0.08 |
| A0A5C2GY48 | IG c1672_light_IGLV3-1_IGLJ2 (Fragment) |  | 3 | 0.87 | 0.84 |
| A0A5C2GYE9 | IG c1409_light_IGKV3-20_IGKJ2 (Fragment) |  | 2 | 1.55 | 0.37 |
| A0A5C2GYH7 | IG c698_light_IGKV1-5_IGKJ1 (Fragment) |  | 2 | 0.50 | 0.23 |
| A0A5C2GYL4 | IG c830_light_IGKV1-12_IGKJ5 (Fragment) |  | 3 | 3.15 | 0.26 |
| A0A5C2GYP0 | IG c860_light_IGKV1D-33_IGKJ2 (Fragment) |  | 2 | 1.66 | 0.25 |
| A0A5C2GYW0 | IG c930_light_IGKV2D-29_IGKJ1 (Fragment) |  | 6 | 1.90 | 0.11 |
| A0A5C2GYX1 | IG c1579_light_IGKV1-5_IGKJ1 (Fragment) |  | 2 | 1.28 | 0.83 |
| A0A5C2GYX9 | IG c1847_heavy_IGHV3-13_IGHD3-3_IGHJ3 (Fragment) |  | 1 | 1.57 | 0.55 |
| A0A5C2GZ09 | IG c990_light_IGKV3D-20_IGKJ4 (Fragment) |  | 2 | 4.52 | 0.12 |
| A0A5C2GZU5 | IG c1300_light_IGKV1-12_IGKJ1 (Fragment) |  | 2 | 0.71 | 0.69 |
| A0A5C2H0F4 | IG c416_light_IGKV3-20_IGKJ5 (Fragment) |  | 2 | 1.08 | 0.88 |
| A0A5C2H0S8 | IG c1548_light_IGKV1-9_IGKJ4 (Fragment) |  | 2 | 2.43 | 0.12 |
| A0A5C2H108 | IG c1743_light_IGLV6-57_IGLJ3 (Fragment) |  | 6 | 2.75 | 0.19 |
| A0A5C2H1J2 | IG c1788_light_IGKV3-20_IGKJ1 (Fragment) |  | 6 | 2.39 | 0.13 |
| A0A5C2H1L6 | IG c360_light_IGLV1-40_IGLJ2 (Fragment) |  | 3 | 1.99 | 0.44 |
| A0A5C2H1S8 | IG c886_light_IGLV3-25_IGLJ3 (Fragment) |  | 3 | 1.23 | 0.60 |
| A0A5C2H1W2 | IG c1918_light_IGLV1-51_IGLJ3 (Fragment) |  | 4 | 3.91 | 0.09 |
| A0A5C2H271 | IG c1046_light_IGKV1-5_IGKJ3 (Fragment) |  | 1 | 2.10 | 0.25 |
| A0A5C2H2E7 | IG c1146_light_IGLV2-14_IGLJ3 (Fragment) |  | 3 | 1.24 | 0.51 |
| A0A5C2H2W5 | IG c1326_light_IGKV1-5_IGKJ1 (Fragment) |  | 1 | 1.47 | 0.57 |
| A0A5C2H3A1 | IG c1476_light_IGLV2-8_IGLJ1 (Fragment) |  | 1 | 1.31 | 0.44 |
| A0A5C2H3L0 | IG c1606_light_IGKV4-1_IGKJ2 (Fragment) |  | 4 | 2.82 | 0.18 |
| A0A5H1ZRQ7 | Immunoglobulin lambda constant 7 (Fragment) | IGLC7 | 5 | 3.13 | 0.12 |
| A0A650F0N3 | Beta-globin (Fragment) |  | 1 | 0.74 | 0.50 |
| A0N071 | Delta globin | HBD | 5 | 1.70 | 0.42 |
| A0N5G1 | Rheumatoid factor C6 light chain (Fragment) | V-kappa-1 | 3 | 2.87 | 0.15 |
| A0N7I9 | F5-20 (Fragment) | F5-20 | 2 | 4.10 | 0.06 |
| A2IPH7 | HRV Fab 025-VH (Fragment) |  | 1 | 0.76 | 0.69 |
| A2J1N0 | Rheumatoid factor RF-IP14 (Fragment) |  | 1 | 3.38 | 0.12 |
| A2J1N5 | Rheumatoid factor RF-ET6 (Fragment) |  | 4 | 0.74 | 0.46 |
| A2J1N6 | Rheumatoid factor RF-ET9 (Fragment) |  | 5 | 0.80 | 0.34 |
| A2J1N7 | Rheumatoid factor RF-ET10 (Fragment) |  | 1 | 1.27 | 0.58 |
| A2JA18 | Anti-mucin1 heavy chain variable region (Fragment) |  | 2 | 1.41 | 0.68 |
| A2N2F4 | VK3 protein (Fragment) | VK3 | 2 | 0.64 | 0.54 |
| A2NKM6 | NANUC-1 heavy chain (Fragment) |  | 2 | 1.51 | 0.17 |
| A2NYU9 | Heavy chain Fab (Fragment) |  | 3 | 1.72 | 0.27 |
| A2RTY6 | Inter-alpha (Globulin) inhibitor H2, isoform CRA_b | ITIH2 | 80 | 0.54 | 0.16 |
| A2VCK8 | Thymosin beta 4, X-linked | TMSB4X | 3 | **1.44** | 0.28 |
| A4F255 | Immunoblobulin G1 Fab heavy chain variable region (Fragment) | VHCH1 | 2 | 2.37 | 0.26 |
| A5PL27 | CP protein | CP | 128 | 0.73 | 0.44 |
| A5PL32 | APOL1 protein (Fragment) | APOL1 | 5 | 0.77 | 0.63 |
| A6PVH9 | Copine-1 | CPNE1 | 1 | 5.73 | 0.30 |
| A6XGL1 | Transthyretin |  | 30 | 0.56 | 0.32 |
| A6XND0 | Insulin-like growth factor-binding protein 3 | IGFBP3 | 8 | 0.99 | 0.98 |
| A6XND9 | Beta-2-microglobulin |  | 7 | 3.78 | 0.06 |
| A8K486 | Peptidyl-prolyl cis-trans isomerase |  | 2 | 2.44 | 0.32 |
| A8K5T0 | cDNA FLJ75416, highly similar to Homo sapiens complement factor H (CFH), mRNA |  | 2 | 2.31 | 0.29 |
| A8K669 | cDNA FLJ78452, highly similar to Homo sapiens legumain (LGMN), transcript variant 2, mRNA |  | 1 | 0.84 | 0.83 |
| B1N7B9 | Cryocrystalglobulin CC2 lambda light chain variable region (Fragment) |  | 3 | 1.22 | 0.73 |
| B2R4M6 | Protein S100 |  | 7 | 1.22 | 0.63 |
| B2R5G8 | Serum amyloid A protein |  | 11 | 0.94 | 0.84 |
| B2R672 | Extracellular link domain containing 1 | XLKD1 | 5 | 1.59 | 0.07 |
| B2R6W1 | cDNA, FLJ93143, highly similar to Homo sapiens complement component 7 (C7), mRNA |  | 4 | 0.99 | 0.97 |
| B2R888 | Monocyte differentiation antigen CD14 |  | 13 | 0.84 | 0.71 |
| B2RA89 | cDNA, FLJ94771, highly similar to Homo sapiens RAS guanyl releasing protein 1 (calcium and DAG-regulated) (RASGRP1), mRNA |  | 1 | 2.26 | 0.59 |
| B2RMS9 | Inter-alpha (Globulin) inhibitor H4 (Plasma Kallikrein-sensitive glycoprotein) | ITIH4 | 81 | 0.42 | 0.05 |
| B2ZZ87 | Nedd4 binding protein 2 | N4BP2 | 1 | 0.58 | 0.27 |
| B3KN52 | cDNA FLJ13606 fis, clone PLACE1010579, highly similar to Homo sapiens GULP, engulfment adaptor PTB domain containing 1 (GULP1), mRNA |  | 2 | 0.68 | 0.38 |
| B3KUE5 | Phospholipid transfer protein, isoform CRA_c | PLTP | 8 | 0.91 | 0.70 |
| B3KWN4 | cDNA FLJ43443 fis, clone OCBBF2031167, highly similar to ADAM 22 (A disintegrin and metalloproteinase domain 22) (Fragment) |  | 1 | 3.68 | 0.12 |
| B4DHZ6 | Transferrin, isoform CRA_c | TF | 4 | 0.54 | 0.54 |
| B4DI57 | cDNA FLJ54111, highly similar to Serotransferrin |  | 3 | 1.26 | 0.71 |
| B4DMC3 | cDNA FLJ60302, highly similar to Neurocan core protein |  | 2 | 0.40 | 0.07 |
| B4DN90 | cDNA FLJ53494, highly similar to Cartilage oligomeric matrix protein |  | 9 | 1.55 | 0.39 |
| B4DPP6 | cDNA FLJ54371, highly similar to Serum albumin |  | 1 | 0.72 | 0.76 |
| B4DPP8 | cDNA FLJ53075, highly similar to Kininogen-1 |  | 8 | 0.95 | 0.87 |
| B4DPR2 | cDNA FLJ50830, highly similar to Serum albumin |  | 7 | 0.58 | 0.18 |
| B4E1B2 | cDNA FLJ53691, highly similar to Serotransferrin |  | 7 | 0.74 | 0.53 |
| B4E1C2 | Kininogen 1, isoform CRA_b | KNG1 | 64 | 0.73 | 0.53 |
| B4E1S8 | cDNA FLJ59147, highly similar to Cysteine-rich secretory protein 3 |  | 1 | 1.22 | 0.56 |
| B4E1Z4 | cDNA FLJ55673, highly similar to Complement factor B (EC 3.4.21.47) |  | 114 | 0.88 | 0.86 |
| B4E2S7 | cDNA FLJ58780, highly similar to Homo sapiens lysosomal-associated membrane protein 2 (LAMP2), transcript variant LAMP2B, mRNA |  | 1 | 1.31 | 0.43 |
| B7Z1F8 | cDNA FLJ53025, highly similar to Complement C4-B |  | 5 | 0.90 | 0.86 |
| B7Z549 | cDNA FLJ56821, highly similar to Inter-alpha-trypsin inhibitor heavy chain H1 |  | 76 | 0.46 | 0.06 |
| B7Z550 | Complement component 8, beta polypeptide, isoform CRA_b | C8B | 54 | **0.55** | **0.15** |
| B7Z8Q2 | cDNA FLJ55606, highly similar to Alpha-2-HS-glycoprotein |  | 26 | 0.73 | 0.47 |
| C0JYY2 | Apolipoprotein B (Including Ag(X) antigen), isoform CRA_a | APOB | 481 | 0.67 | 0.55 |
| C8C504 | Beta-globin | HBB | 1 | 1.52 | 0.53 |
| C9J6L7 | Zinc finger transcription factor Trps1 (Fragment) | TRPS1 | 1 | 0.71 | 0.50 |
| C9JEE0 | Immunoglobulin lambda-like polypeptide 1 (Fragment) | IGLL1 | 1 | 2.81 | 0.16 |
| C9JF17 | Apolipoprotein D (Fragment) | APOD | 15 | 3.27 | 0.20 |
| D6RBA7 | Sorting nexin-14 (Fragment) | SNX14 | 2 | 0.72 | 0.61 |
| D9YZU5 | Beta-globin | HBB | 33 | 1.25 | 0.74 |
| D9ZGG2 | Vitronectin | VTN | 34 | 0.77 | 0.27 |
| E1B4S8 | Apolipoprotein B (Fragment) | APOB | 1 | 0.57 | 0.39 |
| E7EQ64 | Trypsin-1 | PRSS1 | 4 | 1.70 | 0.24 |
| E7ETH0 | Complement factor I | CFI | 37 | 0.51 | 0.35 |
| E9KL23 | Epididymis secretory sperm binding protein Li 44a | SERPINA1 | 93 | 0.82 | 0.75 |
| E9PI18 | Ras-related protein Rab-30 (Fragment) | RAB30 | 2 | 1.00 | 1.00 |
| F2RM37 | Coagulation factor IX | F9 p22 | 10 | 0.30 | 0.21 |
| F6KPG5 | Albumin (Fragment) |  | 9 | 0.32 | 0.33 |
| F8VUB1 | Melanocyte protein PMEL | PMEL | 1 | 2.21 | 0.10 |
| H0YAC1 | Plasma kallikrein (Fragment) | KLKB1 | 53 | 0.70 | 0.30 |
| H3BMD2 | Carnitine O-palmitoyltransferase 1, liver isoform | CPT1A | 1 | 0.51 | 0.05 |
| H6VRF8 | Keratin 1 | KRT1 | 19 | 3.15 | 0.13 |
| I3L145 | Sex hormone-binding globulin, isoform CRA_a | SHBG | 11 | 0.79 | 0.63 |
| K7EMZ7 | Uncharacterized protein C19orf57 | C19orf57 | 2 | 0.56 | 0.28 |
| K7ER74 | APOC4-APOC2 readthrough (NMD candidate) | APOC4-APOC2 | 11 | 0.59 | 0.07 |
| L0R5A1 | Alternative protein CSF2RB | CSF2RB | 1 | 2.54 | 0.21 |
| L0R8D2 | Alternative protein RCOR1 | RCOR1 | 1 | 1.56 | 0.31 |
| M0QYB6 | Trimeric intracellular cation channel type A (Fragment) | TMEM38A | 2 | 1.60 | 0.49 |
| M0R009 | Alpha-1B-glycoprotein (Fragment) | A1BG | 2 | 0.95 | 0.84 |
| O00187 | Mannan-binding lectin serine protease 2 | MASP2 | 4 | 0.63 | 0.35 |
| O43263 | RNA editing deaminase 1 | hRED1 | 2 | 3.10 | 0.39 |
| O43866 | CD5 antigen-like | CD5L | 23 | 0.57 | 0.41 |
| O75636 | Ficolin-3 | FCN3 | 13 | 1.32 | 0.35 |
| O75882 | Attractin | ATRN | 25 | 0.21 | 0.11 |
| P00734 | Prothrombin | F2 | 63 | 0.99 | 0.98 |
| P00738 | Haptoglobin | HP | 74 | 0.46 | 0.16 |
| P00739 | Haptoglobin-related protein | HPR | 15 | 0.86 | 0.84 |
| P00742 | Coagulation factor X | F10 | 16 | 0.55 | 0.31 |
| P00747 | Plasminogen | PLG | 111 | 0.59 | 0.23 |
| P00748 | Coagulation factor XII | F12 | 30 | 0.79 | 0.70 |
| P01023 | Alpha-2-macroglobulin | A2M | 199 | 0.87 | 0.86 |
| P01024 | Complement C3 | C3 | 303 | 0.56 | 0.25 |
| P01031 | Complement C5 | C5 | 106 | 0.63 | 0.26 |
| P01591 | Immunoglobulin J chain | JCHAIN | 14 | 0.67 | 0.18 |
| P02652 | Apolipoprotein A-II | APOA2 | 15 | 0.55 | 0.11 |
| P02671 | Fibrinogen alpha chain | FGA | 43 | 1.69 | 0.12 |
| P02743 | Serum amyloid P-component | APCS | 15 | 0.78 | 0.43 |
| P02750 | Leucine-rich alpha-2-glycoprotein | LRG1 | 21 | 1.58 | 0.45 |
| P02753 | Retinol-binding protein 4 | RBP4 | 17 | 0.91 | 0.44 |
| P02760 | Protein AMBP | AMBP | 32 | 1.51 | 0.52 |
| P02768 | Serum albumin | ALB | 299 | 0.54 | 0.38 |
| P02774 | Vitamin D-binding protein | GC | 88 | 0.44 | 0.19 |
| P02775 | Platelet basic protein | PPBP | 9 | 0.74 | 0.27 |
| P02776 | Platelet factor 4 | PF4 | 7 | 4.69 | 0.27 |
| P02787 | Serotransferrin | TF | 207 | 0.49 | 0.33 |
| P02790 | Hemopexin | HPX | 67 | 0.45 | 0.18 |
| P04003 | C4b-binding protein alpha chain | C4BPA | 53 | 0.85 | 0.64 |
| P04196 | Histidine-rich glycoprotein | HRG | 40 | 0.69 | 0.31 |
| P04217 | Alpha-1B-glycoprotein | A1BG | 33 | 1.01 | 0.97 |
| P04275 | von Willebrand factor | VWF | 63 | **2.52** | **0.14** |
| P05109 | Protein S100-A8 | S100A8 | 4 | 0.71 | 0.64 |
| P05160 | Coagulation factor XIII B chain | F13B | 11 | 0.65 | 0.58 |
| P06727 | Apolipoprotein A-IV | APOA4 | 85 | 0.76 | 0.12 |
| P07357 | Complement component C8 alpha chain | C8A | 37 | 0.59 | 0.06 |
| P07360 | Complement component C8 gamma chain | C8G | 16 | 0.84 | 0.76 |
| P08697 | Alpha-2-antiplasmin | SERPINF2 | 38 | 0.62 | 0.34 |
| P09871 | Complement C1s subcomponent | C1S | 43 | 0.67 | 0.37 |
| P0C0L4 | Complement C4-A | C4A | 196 | 0.73 | 0.53 |
| P0C0L5 | Complement C4-B | C4B | 11 | 0.57 | 0.20 |
| P0DJI8 | Serum amyloid A-1 protein | SAA1 | 10 | 0.56 | 0.48 |
| P0DOX2 | Immunoglobulin alpha-2 heavy chain |  | 4 | 1.90 | 0.45 |
| P0DOX3 | Immunoglobulin delta heavy chain |  | 16 | 1.60 | 0.33 |
| P0DOX6 | Immunoglobulin mu heavy chain |  | 36 | 1.15 | 0.66 |
| P0DOX7 | Immunoglobulin kappa light chain |  | 3 | 0.81 | 0.80 |
| P0DOX8 | Immunoglobulin lambda-1 light chain |  | 10 | 2.78 | 0.13 |
| P10643 | Complement component C7 | C7 | 69 | 0.98 | 0.98 |
| P11226 | Mannose-binding protein C | MBL2 | 6 | 2.20 | 0.19 |
| P13645 | Keratin, type I cytoskeletal 10 | KRT10 | 11 | 1.32 | 0.84 |
| P13671 | Complement component C6 | C6 | 55 | 0.61 | 0.40 |
| P15169 | Carboxypeptidase N catalytic chain | CPN1 | 15 | 0.34 | 0.13 |
| P18428 | Lipopolysaccharide-binding protein | LBP | 9 | 0.71 | 0.49 |
| P19320 | Vascular cell adhesion protein 1 | VCAM1 | 7 | **17.63** | **0.22** |
| P19652 | Alpha-1-acid glycoprotein 2 | ORM2 | 14 | 0.92 | 0.49 |
| P20851 | C4b-binding protein beta chain | C4BPB | 10 | 1.00 | 0.99 |
| P22792 | Carboxypeptidase N subunit 2 | CPN2 | 20 | 0.44 | 0.07 |
| P23142 | Fibulin-1 | FBLN1 | 32 | 1.06 | 0.92 |
| P27169 | Serum paraoxonase/arylesterase 1 | PON1 | 19 | 0.52 | 0.26 |
| P33151 | Cadherin-5 | CDH5 | 7 | 0.58 | 0.45 |
| P35542 | Serum amyloid A-4 protein | SAA4 | 2 | 0.46 | 0.11 |
| P35858 | Insulin-like growth factor-binding protein complex acid labile subunit | IGFALS | 23 | 0.41 | 0.17 |
| P43251 | Biotinidase | BTD | 11 | 0.75 | 0.59 |
| P43652 | Afamin | AFM | 73 | 0.60 | 0.61 |
| P55056 | Apolipoprotein C-IV | APOC4 | 8 | 0.98 | 0.95 |
| P60709 | Actin, cytoplasmic 1 | ACTB | 22 | 1.07 | 0.80 |
| P62913 | 60S ribosomal protein L11 | RPL11 | 2 | 0.51 | 0.39 |
| P80108 | Phosphatidylinositol-glycan-specific phospholipase D | GPLD1 | 20 | 0.43 | 0.15 |
| Q03591 | Complement factor H-related protein 1 | CFHR1 | 8 | 1.13 | 0.81 |
| Q06033 | Inter-alpha-trypsin inhibitor heavy chain H3 | ITIH3 | 42 | 0.56 | 0.16 |
| Q0KKI6 | Immunoblobulin light chain (Fragment) |  | 29 | 2.40 | 0.19 |
| Q0ZCH0 | Immunglobulin heavy chain variable region (Fragment) |  | 1 | 1.58 | 0.11 |
| Q0ZCH4 | Immunglobulin heavy chain variable region (Fragment) |  | 1 | 0.18 | 0.43 |
| Q0ZCI8 | Immunglobulin heavy chain variable region (Fragment) |  | 1 | 1.20 | 0.81 |
| Q15485 | Ficolin-2 | FCN2 | 4 | 2.66 | 0.20 |
| Q53GY3 | Angiotensinogen variant (Fragment) |  | 30 | 0.40 | 0.16 |
| Q569I7 | Uncharacterized protein |  | 1 | 1.11 | 0.88 |
| Q56G89 | Serum albumin |  | 3 | 1.14 | 0.91 |
| Q59F51 | PREDICTED: F-box protein 10 variant (Fragment) |  | 1 | 0.95 | 0.95 |
| Q5FWF9 | IGL@ protein | IGL@ | 9 | 2.14 | 0.09 |
| Q5T7N2 | LINE-1 type transposase domain-containing protein 1 | L1TD1 | 2 | 0.63 | 0.44 |
| Q5XTR9 | Hemoglobin delta-beta fusion protein (Fragment) | HBD/HBB | 2 | 2.11 | 0.24 |
| Q68CN4 | Uncharacterized protein | DKFZp686E23209 | 2 | 2.04 | 0.39 |
| Q68DL7 | Uncharacterized protein C18orf63 | C18orf63 | 2 | 1.76 | 0.32 |
| Q68DR3 | Uncharacterized protein DKFZp779H1622 (Fragment) | DKFZp779H1622 | 3 | 0.74 | 0.55 |
| Q6IPQ0 | IGL@ protein | IGL@ | 1 | 1.18 | 0.55 |
| Q6MZQ6 | Uncharacterized protein DKFZp686G11190 | DKFZp686G11190 | 3 | 2.87 | 0.15 |
| Q6MZW0 | Uncharacterized protein DKFZp686J11235 (Fragment) | DKFZp686J11235 | 2 | 1.93 | 0.32 |
| Q6MZX7 | Uncharacterized protein DKFZp686M24218 | DKFZp686M24218 | 22 | 2.06 | 0.29 |
| Q6N041 | Uncharacterized protein DKFZp686O16217 (Fragment) | DKFZp686O16217 | 8 | 1.49 | 0.57 |
| Q6N091 | Uncharacterized protein DKFZp686C02220 (Fragment) | DKFZp686C02220 | 2 | 0.95 | 0.89 |
| Q6N093 | Uncharacterized protein DKFZp686I04196 (Fragment) | DKFZp686I04196 | 3 | 2.11 | 0.33 |
| Q6N095 | Uncharacterized protein | DKFZp686K03196 | 15 | 2.07 | 0.37 |
| Q6PIK1 | IGL@ protein | IGL@ | 4 | 2.65 | 0.12 |
| Q6UXB8 | Peptidase inhibitor 16 | PI16 | 4 | 0.56 | 0.24 |
| Q6ZVM5 | cDNA FLJ42083 fis, clone TCERX2000613 |  | 1 | 0.25 | 0.28 |
| Q6ZVX0 | cDNA FLJ41981 fis, clone SMINT2011888, highly similar to Protein Tro alpha1 H,myeloma |  | 1 | 0.91 | 0.84 |
| Q6ZW64 | cDNA FLJ41552 fis, clone COLON2004478, highly similar to Protein Tro alpha1 H,myeloma |  | 7 | 1.05 | 0.95 |
| Q7Z351 | Uncharacterized protein DKFZp686N02209 | DKFZp686N02209 | 2 | 3.03 | 0.24 |
| Q86TT1 | Full-length cDNA clone CS0DD006YL02 of Neuroblastoma of Homo sapiens (human) |  | 1 | 1.44 | 0.48 |
| Q86YA3 | Protein ZGRF1 | ZGRF1 | 2 | 0.19 | 0.19 |
| Q8N355 | IGL@ protein | IGL@ | 25 | 3.30 | 0.11 |
| Q8NCL6 | cDNA FLJ90170 fis, clone MAMMA1000370, highly similar to Ig alpha-1 chain C region |  | 15 | 0.74 | 0.32 |
| Q8NEJ1 | Uncharacterized protein |  | 2 | 0.94 | 0.93 |
| Q96K68 | cDNA FLJ14473 fis, clone MAMMA1001080, highly similar to Homo sapiens SNC73 protein (SNC73) mRNA |  | 1 | 0.99 | 0.98 |
| Q96PD5 | N-acetylmuramoyl-L-alanine amidase | PGLYRP2 | 31 | 0.55 | 0.38 |
| Q9NPP6 | Immunoglobulin heavy chain variant (Fragment) |  | 37 | 1.08 | 0.85 |
| Q9NYQ8 | Protocadherin Fat 2 | FAT2 | 3 | 0.35 | 0.23 |
| Q9UGM5 | Fetuin-B | FETUB | 8 | 0.61 | 0.24 |
| Q9UL84 | Myosin-reactive immunoglobulin heavy chain variable region (Fragment) |  | 4 | 1.20 | 0.45 |
| Q9UL89 | Myosin-reactive immunoglobulin heavy chain variable region (Fragment) |  | 6 | 1.45 | 0.25 |
| Q9UL92 | Myosin-reactive immunoglobulin heavy chain variable region (Fragment) |  | 2 | 2.00 | 0.44 |
| S6AWD6 | IgG L chain |  | 2 | 1.75 | 0.36 |
| S6AWE6 | IgG L chain |  | 5 | 1.08 | 0.78 |
| S6B2A6 | IgG H chain |  | 3 | 3.00 | 0.44 |
| S6BAR0 | IgG L chain |  | 2 | 1.55 | 0.62 |
| S6BGD6 | IgG L chain |  | 2 | 1.14 | 0.71 |
| S6BGE0 | IgG H chain |  | 4 | 1.84 | 0.46 |
| S6BGE9 | IgG L chain |  | 2 | 2.20 | 0.45 |
| S6C4R2 | IgG H chain |  | 1 | 2.61 | 0.09 |
| S6C4R7 | IgG L chain |  | 3 | 4.94 | 0.12 |
| V9H1D9 | Alpha globin |  | 3 | 0.42 | 0.34 |
| V9HW68 | Epididymis luminal protein 214 | HEL-214 | 72 | 1.63 | 0.22 |

Notes: Red labeling indicates the upregulated proteins with at least 1.5-fold and green labeling indicates the downregulated proteins with at least 1.5-fold.

| **Table S2 Differentially expressed proteins between the serum samples of the healthy controls and those of HBV genotype C infected patients** | | | | | |
| --- | --- | --- | --- | --- | --- |
| **Protein accession** | **Protein description** | **Gene name** | **Sequence Number** | **B/A Ratio** | **P value** |
| A0A5C2GDY6 | IG c902_heavy_IGHV3-21_IGHD5-12_IGHJ5 (Fragment) |  | 1 | 49.40 | 0.00 |
| A0A5C2G3H6 | IGL c3474_light_IGKV4-1_IGKJ2 (Fragment) |  | 1 | 31.12 | 0.01 |
| P35527 | Keratin, type I cytoskeletal 9 | KRT9 | 9 | 19.77 | 0.05 |
| A0A5C2GIB2 | IG c855_light_IGKV2-30_IGKJ1 (Fragment) |  | 2 | 11.51 | 0.00 |
| A0A5C2GT23 | IG c1239_light_IGLV6-57_IGLJ2 (Fragment) |  | 2 | 9.28 | 0.00 |
| P19320 | Vascular cell adhesion protein 1 | VCAM1 | 7 | **7.41** | 0.04 |
| A0A5C2FYV6 | IGL c1854_light_IGKV4-1_IGKJ2 (Fragment) |  | 2 | 6.30 | 0.05 |
| A0A5C2GXB2 | IG c1079_light_IGKV3-20_IGKJ2 (Fragment) |  | 2 | 6.17 | 0.00 |
| P04275 | von Willebrand factor | VWF | 63 | **4.21** | 0.01 |
| A0A5C2FX62 | IGL c1442_light_IGKV1-12_IGKJ4 (Fragment) |  | 2 | 4.19 | 0.01 |
| A0A5C2G9T9 | IGH + IGL c600_heavy_IGHV3-23_IGHD3-3_IGHJ3 (Fragment) |  | 1 | 3.09 | 0.01 |
| A0A5C2G637 | IGH c419_heavy__IGHV4-39_IGHD3-22_IGHJ4 (Fragment) |  | 3 | 2.81 | 0.00 |
| A0A5C2GEN3 | IG c374_heavy_IGHV3-30_IGHD3-9_IGHJ1 (Fragment) |  | 3 | 2.73 | 0.01 |
| L8E853 | von Willebrand factor | VWF | 2 | 2.67 | 0.00 |
| A0A5C2H1W2 | IG c1918_light_IGLV1-51_IGLJ3 (Fragment) |  | 4 | 2.65 | 0.01 |
| A0A068LKR4 | Ig heavy chain variable region (Fragment) |  | 2 | 2.60 | 0.02 |
| A0A5C2FZK9 | IGL c2134_light_IGKV3-20_IGKJ2 (Fragment) |  | 1 | 2.59 | 0.04 |
| A0A5C2GVU1 | IG c1453_light_IGKV3-11_IGKJ5 (Fragment) |  | 1 | 2.45 | 0.00 |
| A0A5C2G5D3 | IGH c199_heavy__IGHV1-24_IGHD3-10_IGHJ5 (Fragment) |  | 2 | 2.40 | 0.00 |
| A0A5C2GIN0 | IG c1181_light_IGKV3-20_IGKJ3 (Fragment) |  | 1 | 2.37 | 0.02 |
| A0A5C2FXT8 | IGL c1454_light_IGKV1D-39_IGKJ1 (Fragment) |  | 3 | 2.33 | 0.03 |
| A0A5C2G597 | IGL c4124_light_IGLV1-51_IGLJ2 (Fragment) |  | 1 | 2.06 | 0.01 |
| A0A5C2GUK7 | IG c1007_light_IGKV3-20_IGKJ3 (Fragment) |  | 3 | 2.01 | 0.04 |
| A0A5C2GPE7 | IG c440_heavy_IGHV3-49_IGHD3-22_IGHJ4 (Fragment) |  | 2 | 1.96 | 0.04 |
| A0A5C2GYP0 | IG c860_light_IGKV1D-33_IGKJ2 (Fragment) |  | 2 | 1.87 | 0.01 |
| E9PI18 | Ras-related protein Rab-30 (Fragment) | RAB30 | 2 | 1.86 | 0.01 |
| A0A1B0GUU9 | Immunoglobulin heavy constant mu (Fragment) | IGHM | 13 | 1.82 | 0.02 |
| A0A024R319 | Laminin, beta 2 (Laminin S), isoform CRA_a | LAMB2 | 3 | 1.81 | 0.03 |
| A0A5C2GRT4 | IG c599_heavy_IGHV3-53_IGHD4-4_IGHJ4 (Fragment) |  | 1 | 1.74 | 0.00 |
| A0A5C2GAN5 | IGH c363_heavy__IGHV1-69_IGHD6-19_IGHJ6 (Fragment) |  | 1 | 1.74 | 0.00 |
| A0A5C2G5Z9 | IGL c4040_light_IGKV3-20_IGKJ2 (Fragment) |  | 1 | 1.69 | 0.04 |
| A0A5C2G5K0 | IGH c220_heavy__IGHV4-39_IGHD3-3_IGHJ4 (Fragment) |  | 1 | 1.69 | 0.04 |
| A0A5C2G1N6 | IGL c3052_light_IGKV3-20_IGKJ1 (Fragment) |  | 2 | 1.67 | 0.02 |
| A0A0H5AY34 | L-selectin | SELL | 7 | 1.62 | 0.01 |
| A0A5C2GM87 | IG c625_heavy_IGHV3-21_IGHD2-21_IGHJ3 (Fragment) |  | 2 | 1.58 | 0.02 |
| A8K3K1 | cDNA FLJ78096, highly similar to Homo sapiens actin, alpha, cardiac muscle (ACTC), mRNA |  | 4 | 1.57 | 0.01 |
| A0A5C2G285 | IGL c1577_light_IGKV1D-39_IGKJ1 (Fragment) |  | 2 | 1.55 | 0.03 |
| A0A5C2G8V3 | IGH + IGL c260_heavy_IGHV3-30_IGHD3-22_IGHJ4 (Fragment) |  | 3 | 0.66 | 0.03 |
| A0A5C2GIC6 | IG c177_heavy_IGHV4-4_IGHD6-6_IGHJ4 (Fragment) |  | 3 | 0.62 | 0.04 |
| A0A5C2G967 | IGH c484_heavy__IGHV1-69_IGHD3-16_IGHJ5 (Fragment) |  | 1 | 0.62 | 0.04 |
| B4DQJ6 | cDNA FLJ51276, highly similar to Secretogranin-2 |  | 2 | 0.61 | 0.02 |
| A0A5C2GIR6 | IGH + IGL c595_heavy_IGHV3-72_IGHD5-18_IGHJ4 (Fragment) |  | 1 | 0.60 | 0.01 |
| A0A5C2GTI8 | IG c784_light_IGKV1D-13_IGKJ4 (Fragment) |  | 2 | 0.52 | 0.04 |
| B4DMC3 | cDNA FLJ60302, highly similar to Neurocan core protein |  | 2 | 0.51 | 0.01 |
| A0A5C2GRM8 | IG c1364_heavy_IGHV3-66_IGHD3-3_IGHJ4 (Fragment) |  | 3 | 0.51 | 0.00 |
| A0A5C2GS92 | IG c301_light_IGLV6-57_IGLJ2 (Fragment) |  | 1 | 0.48 | 0.03 |
| A0A5C2GFQ6 | IG c672_heavy_IGHV3-15_IGHD6-6_IGHJ4 (Fragment) |  | 2 | 0.47 | 0.03 |
| K7ER74 | APOC4-APOC2 readthrough (NMD candidate) | APOC4-APOC2 | 11 | 0.45 | 0.04 |
| A0A5C2G6T6 | IGH c8_heavy__IGHV3-74_IGHD1-26_IGHJ1 (Fragment) |  | 2 | 0.43 | 0.03 |
| A0A140VK00 | Testicular tissue protein Li 227 |  | 31 | 0.43 | 0.04 |
| A0A5C2GF51 | IG c1306_heavy_IGHV1-2_IGHD1-26_IGHJ4 (Fragment) |  | 2 | 0.40 | 0.01 |
| A0A5C2G569 | IGH c50_heavy__IGHV3-21_IGHD3-22_IGHJ5 (Fragment) |  | 3 | 0.38 | 0.00 |
| B2R950 | cDNA, FLJ94213, highly similar to Homo sapiens pregnancy-zone protein (PZP), mRNA |  | 18 | 0.30 | 0.04 |
| A0A5C2GU19 | IG c1014_light_IGKV3-15_IGKJ1 (Fragment) |  | 1 | 0.26 | 0.00 |
| A0A5C2G1I8 | IGL c2992_light_IGLV3-25_IGLJ2 (Fragment) |  | 3 | 0.25 | 0.02 |
| A8K9P0 | cDNA FLJ78413, highly similar to Homo sapiens albumin, mRNA |  | 2 | 0.24 | 0.03 |
| A0A5C2FZP6 | IGL c747_light_IGKV1-39_IGKJ2 (Fragment) |  | 2 | 0.13 | 0.03 |
| A0A5C2GUT1 | IG c1271_heavy_IGHV3-33_IGHD1-1_IGHJ4 (Fragment) |  | 1 | 0.06 | 0.00 |
| A0A0A0MR13 | Guanine nucleotide-binding protein G(s) subunit alpha isoforms short | GNAS | 1 | 0.05 | 0.02 |
| A0A024R3I5 | Melanoma cell adhesion molecule, isoform CRA_a | MCAM | 2 | 1.41 | 0.03 |
| A0A5C2FXH1 | IGL c295_light_IGKV1-12_IGKJ4 (Fragment) |  | 2 | 0.68 | 0.01 |
| A0A5C2GV81 | IG c1689_heavy_IGHV3-23_IGHD5-18_IGHJ4 (Fragment) |  | 2 | 0.70 | 0.04 |
| P00742 | Coagulation factor X | F10 | 16 | 1.24 | 0.02 |
| P43251 | Biotinidase | BTD | 11 | 1.39 | 0.03 |
| A0A024CIM4 | Carboxylic ester hydrolase |  | 9 | 0.90 | 0.57 |
| A0A024R035 | Complement component 9, isoform CRA_a | C9 | 45 | 1.11 | 0.64 |
| A0A024R0T8 | Apolipoprotein C-I, isoform CRA_a | APOC1 | 10 | 0.42 | 0.31 |
| A0A024R145 | Fructose-bisphosphate aldolase | ALDOB | 12 | 0.27 | 0.31 |
| A0A024R1G8 | Apolipoprotein L, 1, isoform CRA_b | APOL1 | 27 | 0.78 | 0.29 |
| A0A024R2Q7 | C-type lectin domain family 3, member B, isoform CRA_a | CLEC3B | 14 | 0.88 | 0.77 |
| A0A024R3E3 | Apolipoprotein A-I, isoform CRA_a | APOA1 | 101 | 0.90 | 0.60 |
| A0A024R462 | Fibronectin 1, isoform CRA_n | FN1 | 158 | 1.08 | 0.46 |
| A0A024R483 | Uncharacterized protein | MGC99813 | 4 | 1.58 | 0.57 |
| A0A024R610 | Neogenin homolog 1 (Chicken), isoform CRA_a | NEO1 | 3 | 1.28 | 0.49 |
| A0A024R6I6 | Serpin peptidase inhibitor, clade A (Alpha-1 antiproteinase, antitrypsin), member 10, isoform CRA_b | SERPINA10 | 6 | 1.48 | 0.48 |
| A0A024R6I9 | Serpin peptidase inhibitor, clade A (Alpha-1 antiproteinase, antitrypsin), member 4, isoform CRA_a | SERPINA4 | 41 | 1.05 | 0.82 |
| A0A024R6P0 | Serpin peptidase inhibitor, clade A (Alpha-1 antiproteinase, antitrypsin), member 3, isoform CRA_c | SERPINA3 | 51 | 1.05 | 0.69 |
| A0A024R860 | Carbohydrate sulfotransferase | CHST12 | 1 | 1.64 | 0.08 |
| A0A024R8G3 | Prostaglandin D2 synthase 21kDa (Brain), isoform CRA_a | PTGDS | 1 | 0.93 | 0.78 |
| A0A024R8G4 | ADAM metallopeptidase with thrombospondin type 1 motif, 13, isoform CRA_a | ADAMTS13 | 3 | 0.79 | 0.70 |
| A0A024R930 | Proteoglycan 4, isoform CRA_a | PRG4 | 13 | 0.53 | 0.24 |
| A0A024R944 | Serpin peptidase inhibitor, clade C (Antithrombin), member 1, isoform CRA_a | SERPINC1 | 63 | 0.74 | 0.09 |
| A0A024R962 | HCG40889, isoform CRA_b | hCG_40889 | 131 | 1.03 | 0.86 |
| A0A024R9Q1 | Thrombospondin 1, isoform CRA_a | THBS1 | 26 | 1.07 | 0.77 |
| A0A024RAA7 | Complement component 1, q subcomponent, C chain, isoform CRA_a | C1QC | 7 | 1.60 | 0.10 |
| A0A024RAB6 | Heparan sulfate proteoglycan 2 (Perlecan), isoform CRA_b | HSPG2 | 4 | 0.05 | 0.21 |
| A0A024RAB7 | UDP-galactose-4-epimerase, isoform CRA_b | GALE | 1 | 0.97 | 0.87 |
| A0A024RAB9 | Complement component 1, q subcomponent, B chain, isoform CRA_a | C1QB | 12 | 1.28 | 0.52 |
| A0A024RAE8 | Tyrosine-protein phosphatase non-receptor type | PTPN4 | 2 | 0.77 | 0.25 |
| A0A024RAG6 | Complement component 1, q subcomponent, A chain, isoform CRA_a | C1QA | 10 | 1.68 | 0.16 |
| A0A024RBS0 | RNA helicase | DDX55 | 1 | 2.00 | 0.13 |
| A0A024RDT4 | Lymphocyte cytosolic protein 1 (L-plastin), isoform CRA_a | LCP1 | 12 | 0.01 | 0.37 |
| A0A068LKQ2 | Ig heavy chain variable region (Fragment) |  | 3 | 0.99 | 0.99 |
| A0A068LN11 | Ig heavy chain variable region (Fragment) |  | 1 | 3.09 | 0.07 |
| A0A068LRW6 | Ig heavy chain variable region (Fragment) |  | 3 | 0.57 | 0.07 |
| A0A075B6I1 | Immunoglobulin lambda variable 4-60 | IGLV4-60 | 2 | 0.68 | 0.41 |
| A0A075B6I4 | Immunoglobulin lambda variable 10-54 | IGLV10-54 | 1 | 0.80 | 0.45 |
| A0A075B6J9 | Immunoglobulin lambda variable 2-18 | IGLV2-18 | 2 | 0.96 | 0.93 |
| A0A075B6R2 | Immunoglobulin heavy variable 4-4 | IGHV4-4 | 3 | 0.90 | 0.69 |
| A0A075B7D0 | Immunoglobulin heavy variable 1/OR15-1 (non-functional) (Fragment) | IGHV1OR15-1 | 2 | 1.20 | 0.50 |
| A0A087WSY5 | Carboxypeptidase B2 | CPB2 | 22 | 1.05 | 0.72 |
| A0A087WTI0 | VPS10 domain-containing receptor SorCS1 | SORCS1 | 1 | 0.64 | 0.27 |
| A0A087WUP3 | GTP-binding protein 8 | GTPBP8 | 1 | 1.10 | 0.77 |
| A0A087WWD1 | Uncharacterized zinc finger protein 814 | ZNF814 | 1 | 1.15 | 0.68 |
| A0A087WWT3 | Serum albumin | ALB | 4 | 0.74 | 0.61 |
| A0A087WXI2 | IgGFc-binding protein (Fragment) | FCGBP | 21 | 0.12 | 0.40 |
| A0A087X106 | Keratin, type II cuticular Hb1 | KRT81 | 2 | 1.00 | 0.99 |
| A0A087X1J7 | Glutathione peroxidase | GPX3 | 11 | 1.19 | 0.42 |
| A0A090N7U9 | Retinoic acid receptor responder (Tazarotene induced) 2 | RARRES2 | 2 | 0.75 | 0.53 |
| A0A0A0MRA3 | Titin | TTN | 2 | 0.72 | 0.51 |
| A0A0A0MRJ7 | Coagulation factor V | F5 | 33 | 0.67 | 0.25 |
| A0A0A0MT36 | Immunoglobulin kappa variable 6D-21 | IGKV6D-21 | 1 | 0.54 | 0.19 |
| A0A0B4J1U3 | Immunoglobulin lambda variable 1-36 | IGLV1-36 | 1 | 1.40 | 0.32 |
| A0A0B4J1V2 | Immunoglobulin heavy variable 2-26 | IGHV2-26 | 5 | 0.57 | 0.14 |
| A0A0B4J1Y8 | Immunoglobulin lambda variable 9-49 | IGLV9-49 | 3 | 1.96 | 0.08 |
| A0A0C4DGB6 | Serum albumin | ALB | 1 | 0.63 | 0.15 |
| A0A0C4DGH5 | Cullin-associated NEDD8-dissociated protein 1 (Fragment) | CAND1 | 1 | 1.18 | 0.70 |
| A0A0C4DGZ8 | Glycoprotein Ib (Platelet), alpha polypeptide | GP1BA | 3 | 0.92 | 0.54 |
| A0A0C4DH33 | Immunoglobulin heavy variable 1-24 | IGHV1-24 | 3 | 0.73 | 0.54 |
| A0A0C4DH35 | Immunoglobulin heavy variable 3-35 (non-functional) (Fragment) | IGHV3-35 | 2 | 0.96 | 0.95 |
| A0A0C4DH63 | T cell receptor gamma joining P (Fragment) | TRGJP | 2 | 2.04 | 0.18 |
| A0A0C4DH68 | Immunoglobulin kappa variable 2-24 | IGKV2-24 | 5 | 0.65 | 0.45 |
| A0A0G2JMZ6 | Kinesin-like protein (Fragment) | KIF5C | 1 | 1.36 | 0.25 |
| A0A0G2JS06 | Immunoglobulin lambda variable 5-39 | IGLV5-39 | 3 | 0.47 | 0.31 |
| A0A0K0K1J1 | Cystatin | HEL-S-2 | 4 | 0.89 | 0.52 |
| A0A0K2BMD8 | Mutant hemoglobin alpha 2 globin chain | HBA2 | 29 | 0.28 | 0.32 |
| A0A0R7FJH5 | Coagulation factor XII | F12 | 2 | 1.59 | 0.20 |
| A0A0S2Z3D5 | Apolipoprotein E isoform 1 (Fragment) | APOE | 58 | 1.32 | 0.07 |
| A0A0S2Z3Y1 | Lectin galactoside-binding soluble 3 binding protein isoform 1 (Fragment) | LGALS3BP | 12 | 1.65 | 0.32 |
| A0A0S2Z4F1 | EGF containing fibulin-like extracellular matrix protein 1 isoform 1 (Fragment) | EFEMP1 | 12 | 2.38 | 0.20 |
| A0A0S2Z4I5 | Complement factor properdin isoform 1 (Fragment) | CFP | 13 | 1.25 | 0.37 |
| A0A0S2Z4K3 | Protein S isoform 1 (Fragment) | PROS1 | 35 | 0.72 | 0.22 |
| A0A0S2Z4Q2 | Transforming growth factor beta-induced 68kDa isoform 1 (Fragment) | TGFBI | 17 | 1.62 | 0.22 |
| A0A0U1RQC5 | Neurexin-3-beta | NRXN3 | 2 | 1.06 | 0.97 |
| A0A0X9T7T4 | MS-D3 heavy chain variable region (Fragment) |  | 2 | 0.97 | 0.94 |
| A0A0X9UWM4 | IBM-A3 heavy chain variable region (Fragment) |  | 3 | 0.57 | 0.07 |
| A0A0X9V9C4 | GCT-A8 heavy chain variable region (Fragment) |  | 3 | 1.40 | 0.49 |
| A0A109PW33 | MS-C1 light chain variable region (Fragment) |  | 2 | 0.76 | 0.51 |
| A0A109PW41 | GCT-A2 light chain variable region (Fragment) |  | 3 | 10.25 | 0.13 |
| A0A109PW50 | IBM-B3 heavy chain variable region (Fragment) |  | 2 | 1.14 | 0.77 |
| A0A125QYY8 | IBM-B1 light chain variable region (Fragment) |  | 1 | 0.67 | 0.25 |
| A0A125U0V4 | GCT-A2 heavy chain variable region (Fragment) |  | 2 | 0.77 | 0.34 |
| A0A140T8Y3 | Tenascin-X | TNXB | 7 | 0.79 | 0.78 |
| A0A140VJI7 | Testicular tissue protein Li 61 |  | 20 | 0.87 | 0.70 |
| A0A140VJR2 | Testicular tissue protein Li 138 |  | 4 | 0.91 | 0.66 |
| A0A140VK24 | Testicular secretory protein Li 24 |  | 10 | 0.84 | 0.33 |
| A0A140VK56 | Transaldolase |  | 2 | 0.82 | 0.62 |
| A0A140VKE5 | Sulfhydryl oxidase | QSCN6 | 15 | 1.46 | 0.62 |
| A0A140VKF3 | Testis tissue sperm-binding protein Li 70n |  | 34 | 1.24 | 0.31 |
| A0A182DWH7 | Selenoprotein P (Fragment) | SELENOP | 9 | 0.72 | 0.13 |
| A0A1B0GTC3 | Alpha-ketoglutarate-dependent dioxygenase FTO | FTO | 2 | 0.91 | 0.68 |
| A0A1B0GUB1 | Battenin | CLN3 | 1 | 0.32 | 0.08 |
| A0A1B1CYC5 | Vitamin D binding protein (Fragment) | Gc | 4 | 1.81 | 0.17 |
| A0A1C9J6R5 | B cell receptor heavy chain variable region (Fragment) |  | 2 | 0.46 | 0.20 |
| A0A1L7B5J3 | Alpha-1-antitrypsin short transcript variant 1C4 | SERPINA1 | 1 | 1.92 | 0.15 |
| A0A1S5UZ07 | Talin-1 | TLN1 | 3 | 0.15 | 0.28 |
| A0A1U9X793 | APOM |  | 13 | 0.91 | 0.76 |
| A0A1U9X8W4 | C2 |  | 5 | 0.95 | 0.85 |
| A0A1W2PQB1 | Fc of IgG low affinity IIIa receptor isoform 1 | FCGR3A | 5 | 2.27 | 0.17 |
| A0A1W6IYI3 | N90-VRC38.01 heavy chain variable region (Fragment) |  | 2 | 0.51 | 0.47 |
| A0A1W6IYI5 | N90-VRC38.08 heavy chain variable region (Fragment) |  | 2 | 1.11 | 0.82 |
| A0A1W6IYI9 | N90-VRC38.04 heavy chain variable region (Fragment) |  | 1 | 0.85 | 0.87 |
| A0A1W6IYJ0 | N90-VRC38.03 heavy chain variable region (Fragment) |  | 3 | 0.93 | 0.86 |
| A0A1Z1VXF2 | CD44 protein (Fragment) | CD44 | 4 | 1.19 | 0.57 |
| A0A286YES1 | Immunoglobulin heavy constant gamma 3 (Fragment) | IGHG3 | 16 | 1.67 | 0.14 |
| A0A286YEY4 | Immunoglobulin heavy constant gamma 2 (Fragment) | IGHG2 | 30 | 0.70 | 0.38 |
| A0A2P9AMP2 | Uncharacterized protein | BQ8482_280127 | 1 | 1.17 | 0.71 |
| A0A2U8J8I9 | Ig heavy chain variable region (Fragment) | IgH | 2 | 0.95 | 0.60 |
| A0A2U8J8M6 | Ig heavy chain variable region (Fragment) | IgH | 2 | 0.91 | 0.75 |
| A0A2U8J8N6 | Ig heavy chain variable region (Fragment) | IgH | 1 | 0.42 | 0.21 |
| A0A2U8J8N7 | Ig heavy chain variable region (Fragment) | IgH | 1 | 1.01 | 0.94 |
| A0A2U8J8Q1 | Ig heavy chain variable region (Fragment) | IgH | 4 | 0.54 | 0.21 |
| A0A2U8J8Z6 | Ig heavy chain variable region (Fragment) | IgH | 2 | 2.51 | 0.40 |
| A0A2U8J942 | Ig heavy chain variable region (Fragment) | IgH | 1 | 1.45 | 0.12 |
| A0A2U8J995 | Ig heavy chain variable region (Fragment) | IgH | 1 | 2.79 | 0.58 |
| A0A2U8J9D3 | Ig heavy chain variable region (Fragment) | IgH | 1 | 0.61 | 0.40 |
| A0A2X0SG27 | NGEF (Fragment) | NGEF | 1 | 1.29 | 0.60 |
| A0A2Z4LCH4 | Corticosteroid-binding globulin |  | 18 | 1.44 | 0.19 |
| A0A384MDV8 | Epididymis secretory sperm binding protein |  | 37 | 1.14 | 0.40 |
| A0A384MEF1 | Epididymis secretory sperm binding protein |  | 86 | 0.71 | 0.33 |
| A0A384N669 | Epididymis secretory sperm binding protein |  | 19 | 1.33 | 0.45 |
| A0A384NKM6 | Apolipoprotein H (Beta-2-glycoprotein I), isoform CRA_a | APOH | 35 | 0.47 | 0.30 |
| A0A384NKS6 | Clusterin |  | 49 | 0.89 | 0.32 |
| A0A384NPR0 | Epididymis secretory sperm binding protein |  | 3 | 1.03 | 0.93 |
| A0A3B0J0F2 | Adiponectin D | ADID | 3 | 0.65 | 0.23 |
| A0A3B3IRV3 | Malignant T-cell-amplified sequence | MCTS2P | 1 | 1.22 | 0.53 |
| A0A3B3ISR2 | Complement C1r subcomponent | C1R | 39 | 0.83 | 0.42 |
| A0A3G1HEF1 | Mutant serpin family A member 7 |  | 26 | 1.38 | 0.22 |
| A0A449C198 | IGKV1-16*01_S5969 (Fragment) | IGKV1-16 | 1 | 0.61 | 0.18 |
| A0A449C1A8 | IGHV3-20*01_S7413 (Fragment) | IGHV3-20 | 3 | 1.11 | 0.75 |
| A0A4E0W274 | AEP3B2 (Fragment) |  | 1 | 0.69 | 0.45 |
| A0A4P8J6J1 | IgG4_IGHV5-51 (Fragment) |  | 2 | 1.07 | 0.94 |
| A0A4V1EJ14 | IgG1_IGHV1-69 (Fragment) |  | 1 | 0.75 | 0.54 |
| A0A5C2FT71 | IGL c171_light_IGLV2-14_IGLJ2 (Fragment) |  | 3 | 0.62 | 0.40 |
| A0A5C2FTA8 | IGL c188_light_IGKV1-39_IGKJ2 (Fragment) |  | 3 | 1.86 | 0.26 |
| A0A5C2FTB2 | IGL c59_light_IGLV1-40_IGLJ3 (Fragment) |  | 1 | 1.84 | 0.42 |
| A0A5C2FTG3 | IGL c248_light_IGKV1D-33_IGKJ3 (Fragment) |  | 1 | 1.06 | 0.79 |
| A0A5C2FTI5 | IGL c2_light_IGKV1-9_IGKJ3 (Fragment) |  | 3 | 0.13 | 0.22 |
| A0A5C2FTL0 | IGL c32_light_IGKV1-12_IGKJ2 (Fragment) |  | 1 | 1.07 | 0.85 |
| A0A5C2FTM7 | IGL c52_light_IGKV2-30_IGKJ3 (Fragment) |  | 6 | 0.71 | 0.59 |
| A0A5C2FTS0 | IGL c381_light_IGLV2-8_IGLJ2 (Fragment) |  | 1 | 0.81 | 0.69 |
| A0A5C2FTV2 | IGL c142_light_IGKV1-9_IGKJ4 (Fragment) |  | 1 | 0.77 | 0.66 |
| A0A5C2FTV4 | IGL c408_light_IGKV3-20_IGKJ2 (Fragment) |  | 1 | 1.41 | 0.40 |
| A0A5C2FTW0 | IGL c4_light_IGKV1-16_IGKJ3 (Fragment) |  | 2 | 3.67 | 0.33 |
| A0A5C2FTX2 | IGL c24_light_IGLV2-14_IGLJ2 (Fragment) |  | 2 | 0.09 | 0.36 |
| A0A5C2FTY9 | IGL c448_light_IGKV3-20_IGKJ2 (Fragment) |  | 3 | 0.86 | 0.36 |
| A0A5C2FU05 | IGL c44_light_IGKV3-20_IGKJ2 (Fragment) |  | 8 | 0.73 | 0.49 |
| A0A5C2FU63 | IGL c282_light_IGLV1-47_IGLJ2 (Fragment) |  | 3 | 0.54 | 0.50 |
| A0A5C2FU72 | IGL c193_light_IGKV3-20_IGKJ3 (Fragment) |  | 3 | 0.17 | 0.11 |
| A0A5C2FU92 | IGL c551_light_IGLV3-25_IGLJ3 (Fragment) |  | 1 | 0.97 | 0.95 |
| A0A5C2FUC4 | IGL c352_light_IGLV1-40_IGLJ3 (Fragment) |  | 2 | 1.15 | 0.60 |
| A0A5C2FUD7 | IGL c469_light_IGKV1-12_IGKJ4 (Fragment) |  | 1 | 1.31 | 0.61 |
| A0A5C2FUE0 | IGL c608_light_IGKV1D-39_IGKJ2 (Fragment) |  | 2 | 1.56 | 0.44 |
| A0A5C2FUH8 | IGL c519_light_IGLV3-19_IGLJ2 (Fragment) |  | 2 | 1.41 | 0.55 |
| A0A5C2FUR3 | IGL c741_light_IGKV1-12_IGKJ4 (Fragment) |  | 1 | 0.92 | 0.79 |
| A0A5C2FUU0 | IGL c771_light_IGKV2D-28_IGKJ5 (Fragment) |  | 2 | 1.07 | 0.87 |
| A0A5C2FUV2 | IGL c444_light_IGKV1-17_IGKJ2 (Fragment) |  | 2 | 1.65 | 0.13 |
| A0A5C2FUY8 | IGL c414_light_IGKV1D-39_IGKJ1 (Fragment) |  | 3 | 0.79 | 0.46 |
| A0A5C2FV64 | IGL c56_light_IGLV1-40_IGLJ2 (Fragment) |  | 1 | 0.88 | 0.79 |
| A0A5C2FV72 | IGL c672_light_IGKV3-20_IGKJ3 (Fragment) |  | 1 | 2.07 | 0.07 |
| A0A5C2FVD4 | IGL c742_light_IGLV2-23_IGLJ3 (Fragment) |  | 1 | 1.35 | 0.59 |
| A0A5C2FVE4 | IGL c40_light_IGKV3-20_IGKJ2 (Fragment) |  | 2 | 0.27 | 0.34 |
| A0A5C2FVF5 | IGL c50_light_IGKV1-5_IGKJ4 (Fragment) |  | 2 | 0.88 | 0.63 |
| A0A5C2FVG1 | IGL c889_light_IGKV2D-28_IGKJ2 (Fragment) |  | 1 | 0.54 | 0.43 |
| A0A5C2FVI2 | IGL c1041_light_IGLV2-14_IGLJ1 (Fragment) |  | 2 | 1.40 | 0.55 |
| A0A5C2FVJ7 | IGL c1078_light_IGKV1D-17_IGKJ1 (Fragment) |  | 4 | 0.41 | 0.16 |
| A0A5C2FVJ8 | IGL c196_light_IGLV2-11_IGLJ3 (Fragment) |  | 2 | 1.12 | 0.81 |
| A0A5C2FVT3 | IGL c744_light_IGKV1-12_IGKJ2 (Fragment) |  | 1 | 1.23 | 0.23 |
| A0A5C2FVT6 | IGL c1039_light_IGKV1-6_IGKJ2 (Fragment) |  | 1 | 1.02 | 0.84 |
| A0A5C2FVV5 | IGL c1208_light_IGKV1-16_IGKJ1 (Fragment) |  | 1 | 1.68 | 0.18 |
| A0A5C2FVW2 | IGL c1069_light_IGKV3-11_IGKJ2 (Fragment) |  | 3 | 0.59 | 0.27 |
| A0A5C2FVW3 | IGL c1151_light_IGKV3-15_IGKJ4 (Fragment) |  | 1 | 0.90 | 0.78 |
| A0A5C2FVX9 | IGL c972_light_IGLV8-61_IGLJ3 (Fragment) |  | 6 | 0.39 | 0.33 |
| A0A5C2FVZ8 | IGL c992_light_IGKV1-27_IGKJ3 (Fragment) |  | 4 | 0.32 | 0.39 |
| A0A5C2FW10 | IGL c1201_light_IGKV1D-39_IGKJ5 (Fragment) |  | 1 | 1.14 | 0.22 |
| A0A5C2FW17 | IGL c1012_light_IGKV1-5_IGKJ1 (Fragment) |  | 2 | 0.81 | 0.84 |
| A0A5C2FW50 | IGL c416_light_IGKV1D-39_IGKJ2 (Fragment) |  | 4 | 0.95 | 0.87 |
| A0A5C2FW75 | IGL c1338_light_IGLV3-21_IGLJ1 (Fragment) |  | 1 | 0.58 | 0.33 |
| A0A5C2FW77 | IGL c1281_light_IGLV1-47_IGLJ3 (Fragment) |  | 1 | 0.95 | 0.83 |
| A0A5C2FWF1 | IGL c1418_light_IGLV1-47_IGLJ3 (Fragment) |  | 2 | 2.35 | 0.45 |
| A0A5C2FWH3 | IGL c1162_light_IGKV3-20_IGKJ5 (Fragment) |  | 1 | 1.22 | 0.63 |
| A0A5C2FWM5 | IGL c1498_light_IGKV1D-39_IGKJ1 (Fragment) |  | 2 | 0.95 | 0.88 |
| A0A5C2FWN5 | IGL c1508_light_IGKV3-11_IGKJ4 (Fragment) |  | 1 | 0.90 | 0.88 |
| A0A5C2FWP4 | IGL c1369_light_IGKV1-5_IGKJ2 (Fragment) |  | 2 | 0.92 | 0.76 |
| A0A5C2FWR3 | IGL c560_light_IGKV3-20_IGKJ1 (Fragment) |  | 1 | 0.43 | 0.46 |
| A0A5C2FWS8 | IGL c365_light_IGKV1D-39_IGKJ2 (Fragment) |  | 2 | 2.35 | 0.24 |
| A0A5C2FWU1 | IGL c1501_light_IGKV3-11_IGKJ4 (Fragment) |  | 2 | 1.52 | 0.35 |
| A0A5C2FWX9 | IGL c1459_light_IGKV1-33_IGKJ3 (Fragment) |  | 1 | 1.54 | 0.14 |
| A0A5C2FWY4 | IGL c1541_light_IGLV2-11_IGLJ3 (Fragment) |  | 1 | 1.55 | 0.18 |
| A0A5C2FX45 | IGL c1539_light_IGKV3-15_IGKJ1 (Fragment) |  | 1 | 0.86 | 0.85 |
| A0A5C2FX48 | IGL c806_light_IGKV1-5_IGKJ2 (Fragment) |  | 7 | 1.25 | 0.39 |
| A0A5C2FX66 | IGL c770_light_IGKV1-5_IGKJ1 (Fragment) |  | 2 | 1.22 | 0.88 |
| A0A5C2FX88 | IGL c1591_light_IGKV2-30_IGKJ4 (Fragment) |  | 1 | 2.30 | 0.22 |
| A0A5C2FXC1 | IGL c830_light_IGLV3-9_IGLJ2 (Fragment) |  | 7 | 0.86 | 0.72 |
| A0A5C2FXL7 | IGL c1325_light_IGLV1-44_IGLJ2 (Fragment) |  | 1 | 1.18 | 0.71 |
| A0A5C2FXM8 | IGL c1758_light_IGLV2-14_IGLJ2 (Fragment) |  | 3 | 1.20 | 0.81 |
| A0A5C2FXQ9 | IGL c1719_light_IGKV1-27_IGKJ2 (Fragment) |  | 1 | 0.03 | 0.15 |
| A0A5C2FXR4 | IGL c1729_light_IGKV1D-39_IGKJ1 (Fragment) |  | 1 | 0.96 | 0.84 |
| A0A5C2FXS5 | IGL c1682_light_IGKV1-12_IGKJ1 (Fragment) |  | 1 | 1.38 | 0.62 |
| A0A5C2FXX3 | IGL c1494_light_IGKV3-15_IGKJ5 (Fragment) |  | 4 | 1.27 | 0.71 |
| A0A5C2FXY6 | IGL c1752_light_IGKV1D-13_IGKJ4 (Fragment) |  | 2 | 0.98 | 0.95 |
| A0A5C2FXZ8 | IGL c1524_light_IGKV4-1_IGKJ1 (Fragment) |  | 4 | 0.70 | 0.38 |
| A0A5C2FY50 | IGL c1958_light_IGKV1-12_IGKJ4 (Fragment) |  | 1 | 0.98 | 0.74 |
| A0A5C2FY51 | IGL c1096_light_IGLV6-57_IGLJ2 (Fragment) |  | 1 | 0.87 | 0.76 |
| A0A5C2FY75 | IGL c1842_light_IGKV1D-43_IGKJ1 (Fragment) |  | 3 | 1.16 | 0.64 |
| A0A5C2FYC1 | IGL c1166_light_IGKV3-20_IGKJ2 (Fragment) |  | 1 | 1.62 | 0.32 |
| A0A5C2FYC9 | IGL c1902_light_IGKV2-30_IGKJ1 (Fragment) |  | 1 | 3.97 | 0.44 |
| A0A5C2FYG2 | IGL c1959_light_IGKV4-1_IGKJ1 (Fragment) |  | 1 | 0.56 | 0.12 |
| A0A5C2FYG6 | IGL c1270_light_IGKV1D-39_IGKJ1 (Fragment) |  | 1 | 0.99 | 0.79 |
| A0A5C2FYH6 | IGL c2011_light_IGKV1D-33_IGKJ4 (Fragment) |  | 6 | 1.24 | 0.26 |
| A0A5C2FYI0 | IGL c1290_light_IGKV1-5_IGKJ1 (Fragment) |  | 2 | 0.83 | 0.52 |
| A0A5C2FYI2 | IGL c1226_light_IGKV1-5_IGKJ1 (Fragment) |  | 2 | 1.32 | 0.39 |
| A0A5C2FYI5 | IGL c1714_light_IGKV6-21_IGKJ4 (Fragment) |  | 4 | 1.19 | 0.79 |
| A0A5C2FYL2 | IGL c2002_light_IGKV1-39_IGKJ1 (Fragment) |  | 5 | 0.43 | 0.05 |
| A0A5C2FYL9 | IGL c745_light_IGLV1-36_IGLJ3 (Fragment) |  | 2 | 0.90 | 0.82 |
| A0A5C2FYM3 | IGL c2071_light_IGKV4-1_IGKJ1 (Fragment) |  | 1 | 1.53 | 0.24 |
| A0A5C2FYN0 | IGL c367_light_IGLV1-44_IGLJ3 (Fragment) |  | 2 | 1.03 | 0.93 |
| A0A5C2FYN5 | IGL c2081_light_IGKV1-17_IGKJ1 (Fragment) |  | 4 | 1.35 | 0.43 |
| A0A5C2FYS5 | IGL c2039_light_IGLV2-14_IGLJ1 (Fragment) |  | 3 | 0.49 | 0.25 |
| A0A5C2FYZ3 | IGL c875_light_IGKV3-20_IGKJ1 (Fragment) |  | 1 | 0.78 | 0.53 |
| A0A5C2FZ00 | IGL c1460_light_IGLV2-8_IGLJ3 (Fragment) |  | 3 | 1.15 | 0.77 |
| A0A5C2FZ14 | IGL c1480_light_IGKV1D-39_IGKJ1 (Fragment) |  | 1 | 3.04 | 0.39 |
| A0A5C2FZ15 | IGL c2139_light_IGKV1D-39_IGKJ4 (Fragment) |  | 3 | 1.72 | 0.28 |
| A0A5C2FZ22 | IGL c517_light_IGKV1-39_IGKJ2 (Fragment) |  | 3 | 0.65 | 0.18 |
| A0A5C2FZ23 | IGL c2278_light_IGLV6-57_IGLJ3 (Fragment) |  | 1 | 1.06 | 0.72 |
| A0A5C2FZ97 | IGL c1486_light_IGKV3-20_IGKJ2 (Fragment) |  | 1 | 0.87 | 0.71 |
| A0A5C2FZC1 | IGL c2311_light_IGKV3-20_IGKJ1 (Fragment) |  | 1 | 0.71 | 0.48 |
| A0A5C2FZM5 | IGL c625_light_IGKV3-11_IGKJ4 (Fragment) |  | 3 | 0.66 | 0.28 |
| A0A5C2FZN1 | IGL c2478_light_IGKV1D-33_IGKJ3 (Fragment) |  | 2 | 0.82 | 0.58 |
| A0A5C2FZQ2 | IGL c2402_light_IGKV2-28_IGKJ4 (Fragment) |  | 4 | 1.13 | 0.47 |
| A0A5C2FZT2 | IGL c1636_light_IGKV1-9_IGKJ4 (Fragment) |  | 2 | 1.69 | 0.10 |
| A0A5C2FZV7 | IGL c817_light_IGKV2-30_IGKJ2 (Fragment) |  | 1 | 1.08 | 0.81 |
| A0A5C2G035 | IGL c2519_light_IGLV7-46_IGLJ3 (Fragment) |  | 1 | 0.44 | 0.31 |
| A0A5C2G045 | IGL c917_light_IGKV3-20_IGKJ1 (Fragment) |  | 3 | 0.70 | 0.55 |
| A0A5C2G0A7 | IGL c987_light_IGKV3-11_IGKJ4 (Fragment) |  | 5 | 0.97 | 0.88 |
| A0A5C2G0B7 | IGL c1846_light_IGLV1-40_IGLJ2 (Fragment) |  | 1 | 1.11 | 0.69 |
| A0A5C2G0B9 | IGL c1395_light_IGKV3-20_IGKJ2 (Fragment) |  | 4 | 1.11 | 0.77 |
| A0A5C2G0C6 | IGL c2681_light_IGLV1-44_IGLJ3 (Fragment) |  | 2 | 2.10 | 0.19 |
| A0A5C2G0D4 | IGL c2718_light_IGLV1-44_IGLJ2 (Fragment) |  | 1 | 3.12 | 0.09 |
| A0A5C2G0E0 | IGL c1415_light_IGKV1D-39_IGKJ2 (Fragment) |  | 1 | 0.70 | 0.30 |
| A0A5C2G0F1 | IGL c1886_light_IGKV1-12_IGKJ4 (Fragment) |  | 2 | 0.78 | 0.66 |
| A0A5C2G0F4 | IGL c2659_light_IGKV1D-16_IGKJ5 (Fragment) |  | 2 | 1.69 | 0.14 |
| A0A5C2G0F5 | IGL c2030_light_IGKV1-39_IGKJ1 (Fragment) |  | 4 | 1.16 | 0.21 |
| A0A5C2G0I0 | IGL c2070_light_IGKV3-20_IGKJ4 (Fragment) |  | 1 | 2.25 | 0.14 |
| A0A5C2G0K7 | IGL c2652_light_IGKV2D-29_IGKJ1 (Fragment) |  | 2 | 0.82 | 0.33 |
| A0A5C2G0Q5 | IGL c2120_light_IGKV4-1_IGKJ1 (Fragment) |  | 5 | 0.83 | 0.66 |
| A0A5C2G0Y8 | IGL c1137_light_IGKV1-39_IGKJ1 (Fragment) |  | 2 | 1.27 | 0.65 |
| A0A5C2G0Z1 | IGL c2634_light_IGKV1-39_IGKJ5 (Fragment) |  | 2 | 2.79 | 0.50 |
| A0A5C2G146 | IGL c2852_light_IGKV3-20_IGKJ2 (Fragment) |  | 1 | 1.13 | 0.45 |
| A0A5C2G173 | IGL c2300_light_IGKV1D-13_IGKJ4 (Fragment) |  | 1 | 1.46 | 0.62 |
| A0A5C2G176 | IGL c1227_light_IGKV3-11_IGKJ3 (Fragment) |  | 1 | 1.62 | 0.32 |
| A0A5C2G1A1 | IGL c2929_light_IGLV1-51_IGLJ2 (Fragment) |  | 2 | 0.78 | 0.14 |
| A0A5C2G1A4 | IGL c113_light_IGKV3-15_IGKJ1 (Fragment) |  | 3 | 1.32 | 0.60 |
| A0A5C2G1A5 | IGL c1257_light_IGKV1D-13_IGKJ2 (Fragment) |  | 2 | 0.37 | 0.26 |
| A0A5C2G1A6 | IGL c1715_light_IGKV1-27_IGKJ1 (Fragment) |  | 3 | 1.49 | 0.35 |
| A0A5C2G1B1 | IGL c2912_light_IGLV2-14_IGLJ1 (Fragment) |  | 4 | 0.51 | 0.55 |
| A0A5C2G1F7 | IGL c163_light_IGKV3-20_IGKJ1 (Fragment) |  | 1 | 0.64 | 0.27 |
| A0A5C2G1H3 | IGL c1317_light_IGKV1-5_IGKJ1 (Fragment) |  | 1 | 1.28 | 0.23 |
| A0A5C2G1L7 | IGL c1835_light_IGKV1-5_IGKJ1 (Fragment) |  | 1 | 1.16 | 0.66 |
| A0A5C2G1M0 | IGL c233_light_IGLV3-19_IGLJ2 (Fragment) |  | 3 | 2.17 | 0.16 |
| A0A5C2G1M2 | IGL c3171_light_IGLV5-45_IGLJ2 (Fragment) |  | 1 | 0.95 | 0.86 |
| A0A5C2G1M4 | IGL c1367_light_IGKV3-20_IGKJ2 (Fragment) |  | 2 | 1.36 | 0.23 |
| A0A5C2G1N1 | IGL c2366_light_IGKV3-20_IGKJ1 (Fragment) |  | 2 | 0.51 | 0.48 |
| A0A5C2G1P4 | IGL c2470_light_IGLV1-47_IGLJ3 (Fragment) |  | 1 | 1.38 | 0.25 |
| A0A5C2G1U4 | IGL c2426_light_IGKV1-5_IGKJ1 (Fragment) |  | 4 | 1.67 | 0.05 |
| A0A5C2G1U7 | IGL c3139_light_IGKV1-5_IGKJ4 (Fragment) |  | 1 | 0.65 | 0.19 |
| A0A5C2G1X9 | IGL c343_light_IGKV3-20_IGKJ1 (Fragment) |  | 2 | 0.91 | 0.82 |
| A0A5C2G219 | IGL c1862_light_IGKV1-5_IGKJ2 (Fragment) |  | 2 | 0.51 | 0.27 |
| A0A5C2G229 | IGL c2506_light_IGKV1-33_IGKJ4 (Fragment) |  | 1 | 0.91 | 0.77 |
| A0A5C2G271 | IGL c1567_light_IGLV2-8_IGLJ2 (Fragment) |  | 1 | 3.87 | 0.22 |
| A0A5C2G2B3 | IGL c2710_light_IGLV1-47_IGLJ1 (Fragment) |  | 2 | 0.43 | 0.45 |
| A0A5C2G2C0 | IGL c2586_light_IGKV1-9_IGKJ4 (Fragment) |  | 2 | 1.04 | 0.78 |
| A0A5C2G2E1 | IGL c3441_light_IGKV1D-39_IGKJ2 (Fragment) |  | 2 | 1.38 | 0.11 |
| A0A5C2G2F5 | IGL c2626_light_IGKV1-39_IGKJ2 (Fragment) |  | 2 | 0.71 | 0.44 |
| A0A5C2G2K2 | IGL c3382_light_IGKV1D-12_IGKJ4 (Fragment) |  | 2 | 1.93 | 0.42 |
| A0A5C2G2K8 | IGL c573_light_IGKV3-20_IGKJ3 (Fragment) |  | 1 | 0.72 | 0.49 |
| A0A5C2G2P9 | IGL c2225_light_IGLV1-47_IGLJ2 (Fragment) |  | 3 | 1.45 | 0.06 |
| A0A5C2G2R4 | IGL c2880_light_IGKV3-20_IGKJ1 (Fragment) |  | 1 | 1.26 | 0.21 |
| A0A5C2G2S7 | IGL c2766_light_IGKV1-5_IGKJ2 (Fragment) |  | 4 | 1.21 | 0.64 |
| A0A5C2G2U5 | IGL c2275_light_IGKV3-15_IGKJ1 (Fragment) |  | 2 | 1.09 | 0.62 |
| A0A5C2G2Z0 | IGL c1787_light_IGKV1D-17_IGKJ2 (Fragment) |  | 2 | 0.94 | 0.88 |
| A0A5C2G309 | IGL c3532_light_IGLV4-69_IGLJ2 (Fragment) |  | 5 | 0.94 | 0.91 |
| A0A5C2G310 | IGL c2856_light_IGKV3-20_IGKJ2 (Fragment) |  | 1 | 0.85 | 0.43 |
| A0A5C2G339 | IGL c763_light_IGKV1-6_IGKJ1 (Fragment) |  | 1 | 0.65 | 0.32 |
| A0A5C2G360 | IGL c793_light_IGKV1D-33_IGKJ2 (Fragment) |  | 3 | 0.73 | 0.27 |
| A0A5C2G367 | IGL c3718_light_IGKV1D-39_IGKJ4 (Fragment) |  | 2 | 1.97 | 0.16 |
| A0A5C2G376 | IGL c3569_light_IGKV1-5_IGKJ1 (Fragment) |  | 2 | 0.57 | 0.34 |
| A0A5C2G389 | IGL c3731_light_IGKV1D-39_IGKJ1 (Fragment) |  | 1 | 0.74 | 0.51 |
| A0A5C2G390 | IGL c3041_light_IGLV3-25_IGLJ2 (Fragment) |  | 1 | 0.66 | 0.31 |
| A0A5C2G3B3 | IGL c3642_light_IGLV1-40_IGLJ1 (Fragment) |  | 1 | 0.79 | 0.33 |
| A0A5C2G3C8 | IGL c1927_light_IGKV3-11_IGKJ4 (Fragment) |  | 1 | 1.09 | 0.68 |
| A0A5C2G3D5 | IGL c1937_light_IGKV4-1_IGKJ2 (Fragment) |  | 4 | 0.69 | 0.54 |
| A0A5C2G3F3 | IGL c3016_light_IGLV3-1_IGLJ2 (Fragment) |  | 1 | 0.97 | 0.94 |
| A0A5C2G3G3 | IGL c3150_light_IGLV1-40_IGLJ1 (Fragment) |  | 1 | 1.40 | 0.16 |
| A0A5C2G3G9 | IGL c3828_light_IGKV3-20_IGKJ1 (Fragment) |  | 4 | 1.55 | 0.27 |
| A0A5C2G3H4 | IGL c3831_light_IGLV1-44_IGLJ3 (Fragment) |  | 2 | 0.80 | 0.67 |
| A0A5C2G3I9 | IGL c3848_light_IGLV6-57_IGLJ3 (Fragment) |  | 3 | 1.55 | 0.58 |
| A0A5C2G3J8 | IGL c3494_light_IGKV1-5_IGKJ1 (Fragment) |  | 3 | 0.55 | 0.20 |
| A0A5C2G3K7 | IGL c3868_light_IGKV1-33_IGKJ4 (Fragment) |  | 1 | 2.70 | 0.22 |
| A0A5C2G3L5 | IGL c2027_light_IGLV1-40_IGLJ3 (Fragment) |  | 6 | 0.74 | 0.42 |
| A0A5C2G3P7 | IGL c3116_light_IGLV2-18_IGLJ3 (Fragment) |  | 2 | 1.14 | 0.75 |
| A0A5C2G3R6 | IGL c3779_light_IGKV3-20_IGKJ3 (Fragment) |  | 1 | 1.26 | 0.56 |
| A0A5C2G3V4 | IGL c3852_light_IGLV2-23_IGLJ2 (Fragment) |  | 4 | 0.32 | 0.38 |
| A0A5C2G3Y2 | IGL c3882_light_IGKV1-5_IGKJ5 (Fragment) |  | 1 | 1.83 | 0.21 |
| A0A5C2G3Z0 | IGL c4011_light_IGKV1D-13_IGKJ3 (Fragment) |  | 4 | 0.84 | 0.44 |
| A0A5C2G420 | IGL c3869_light_IGKV2D-40_IGKJ2 (Fragment) |  | 2 | 0.47 | 0.36 |
| A0A5C2G435 | IGL c1063_light_IGKV3-20_IGKJ4 (Fragment) |  | 2 | 1.10 | 0.85 |
| A0A5C2G4A9 | IGL c1133_light_IGKV3-20_IGKJ1 (Fragment) |  | 3 | 1.93 | 0.07 |
| A0A5C2G4F7 | IGL c3450_light_IGKV1-39_IGKJ1 (Fragment) |  | 4 | 0.84 | 0.68 |
| A0A5C2G4J5 | IGL c4122_light_IGKV1-39_IGKJ1 (Fragment) |  | 1 | 2.10 | 0.34 |
| A0A5C2G4N5 | IGL c3396_light_IGLV2-14_IGLJ3 (Fragment) |  | 1 | 0.37 | 0.37 |
| A0A5C2G4R6 | IGL c2507_light_IGKV1D-39_IGKJ1 (Fragment) |  | 2 | 1.45 | 0.53 |
| A0A5C2G4T4 | IGL c3550_light_IGLV3-19_IGLJ3 (Fragment) |  | 3 | 1.82 | 0.24 |
| A0A5C2G4U1 | IGL c2537_light_IGKV3-11_IGKJ4 (Fragment) |  | 2 | 0.95 | 0.97 |
| A0A5C2G542 | IGH c10_heavy__IGHV5-51_IGHD5-18_IGHJ6 (Fragment) |  | 2 | 0.28 | 0.37 |
| A0A5C2G571 | IGL c4094_light_IGLV1-51_IGLJ2 (Fragment) |  | 2 | 1.82 | 0.22 |
| A0A5C2G586 | IGH c149_heavy__IGHV3-20_IGHD3-10_IGHJ6 (Fragment) |  | 1 | 0.86 | 0.83 |
| A0A5C2G5D1 | IGL c3065_light_IGKV3-20_IGKJ5 (Fragment) |  | 2 | 1.49 | 0.21 |
| A0A5C2G5J5 | IGL c1613_light_IGLV3-1_IGLJ2 (Fragment) |  | 1 | 0.85 | 0.52 |
| A0A5C2G5R3 | IGH c290_heavy__IGHV3-7_IGHD1-14_IGHJ4 (Fragment) |  | 2 | 0.70 | 0.38 |
| A0A5C2G5S3 | IGL c3786_light_IGLV1-44_IGLJ1 (Fragment) |  | 7 | 0.77 | 0.71 |
| A0A5C2G5W5 | IGL c3990_light_IGLV1-47_IGLJ2 (Fragment) |  | 2 | 0.91 | 0.77 |
| A0A5C2G5W6 | IGL c3185_light_IGKV3-20_IGKJ1 (Fragment) |  | 2 | 0.75 | 0.37 |
| A0A5C2G615 | IGH c399_heavy__IGHV3-21_IGHD3-9_IGHJ5 (Fragment) |  | 2 | 0.94 | 0.91 |
| A0A5C2G617 | IGH c127_heavy__IGHV1-69_IGHD3-22_IGHJ4 (Fragment) |  | 1 | 1.32 | 0.21 |
| A0A5C2G631 | IGL c3255_light_IGKV3-15_IGKJ4 (Fragment) |  | 4 | 0.82 | 0.63 |
| A0A5C2G649 | IGH c446_heavy__IGHV3-21_IGHD3-9_IGHJ4 (Fragment) |  | 2 | 0.51 | 0.21 |
| A0A5C2G662 | IGH c466_heavy__IGHV3-20_IGHD7-27_IGHJ2 (Fragment) |  | 4 | 0.87 | 0.79 |
| A0A5C2G676 | IGH c82_heavy__IGHV1-69_IGHD3-10_IGHJ6 (Fragment) |  | 1 | 1.43 | 0.68 |
| A0A5C2G678 | IGL c1903_light_IGLV3-27_IGLJ3 (Fragment) |  | 4 | 0.62 | 0.20 |
| A0A5C2G686 | IGH c506_heavy__IGHV3-43_IGHD2-15_IGHJ4 (Fragment) |  | 2 | 0.67 | 0.25 |
| A0A5C2G6B6 | IGH c217_heavy__IGHV3-33_IGHD6-19_IGHJ4 (Fragment) |  | 1 | 0.73 | 0.53 |
| A0A5C2G6C5 | IGL c3197_light_IGKV2D-29_IGKJ4 (Fragment) |  | 2 | 1.35 | 0.27 |
| A0A5C2G6G1 | IGL c3946_light_IGLV3-10_IGLJ3 (Fragment) |  | 3 | 1.30 | 0.24 |
| A0A5C2G6H5 | IGH c192_heavy__IGHV3-74_IGHD5-18_IGHJ6 (Fragment) |  | 2 | 0.89 | 0.85 |
| A0A5C2G6I4 | IGL c2033_light_IGKV3-11_IGKJ4 (Fragment) |  | 2 | 1.32 | 0.61 |
| A0A5C2G6I5 | IGL c14_light_IGKV2-28_IGKJ2 (Fragment) |  | 1 | 1.18 | 0.63 |
| A0A5C2G6J5 | IGH c549_heavy__IGHV3-33_IGHD6-13_IGHJ4 (Fragment) |  | 1 | 2.60 | 0.18 |
| A0A5C2G6J6 | IGH c212_heavy__IGHV3-9_IGHD2-15_IGHJ4 (Fragment) |  | 1 | 0.60 | 0.20 |
| A0A5C2G6J9 | IGL c3415_light_IGKV1D-13_IGKJ2 (Fragment) |  | 2 | 0.93 | 0.85 |
| A0A5C2G6K7 | IGH c600_heavy__IGHV2-70_IGHD5-24_IGHJ4 (Fragment) |  | 1 | 0.52 | 0.06 |
| A0A5C2G6M6 | IGH c242_heavy__IGHV3-11_IGHD6-13_IGHJ6 (Fragment) |  | 2 | 0.34 | 0.25 |
| A0A5C2G6N3 | IGL c18_light_IGLV3-25_IGLJ2 (Fragment) |  | 1 | 0.94 | 0.84 |
| A0A5C2G6P7 | IGL c84_light_IGKV1-5_IGKJ1 (Fragment) |  | 1 | 0.91 | 0.65 |
| A0A5C2G6R8 | IGL c3475_light_IGKV1D-33_IGKJ4 (Fragment) |  | 1 | 1.04 | 0.87 |
| A0A5C2G6S4 | IGL c27_light_IGLV3-21_IGLJ2 (Fragment) |  | 3 | 0.91 | 0.68 |
| A0A5C2G6T3 | IGL c2143_light_IGLV2-14_IGLJ1 (Fragment) |  | 4 | 0.75 | 0.58 |
| A0A5C2G6X2 | IGL c2183_light_IGKV3-11_IGKJ4 (Fragment) |  | 1 | 0.57 | 0.14 |
| A0A5C2G6X6 | IGL c87_light_IGLV3-21_IGLJ2 (Fragment) |  | 4 | 0.94 | 0.91 |
| A0A5C2G6X7 | IGL c184_light_IGLV3-21_IGLJ2 (Fragment) |  | 1 | 0.59 | 0.32 |
| A0A5C2G711 | IGL c224_light_IGKV3-11_IGKJ4 (Fragment) |  | 7 | 0.64 | 0.43 |
| A0A5C2G716 | IGH c427_heavy__IGHV3-74_IGHD7-27_IGHJ4 (Fragment) |  | 1 | 1.10 | 0.76 |
| A0A5C2G725 | IGL c198_light_IGKV1-12_IGKJ2 (Fragment) |  | 5 | 2.86 | 0.15 |
| A0A5C2G728 | IGL c3515_light_IGLV4-69_IGLJ3 (Fragment) |  | 1 | 0.53 | 0.46 |
| A0A5C2G750 | IGL c228_light_IGLV2-11_IGLJ3 (Fragment) |  | 1 | 0.81 | 0.58 |
| A0A5C2G767 | IGH c442_heavy__IGHV3-23_IGHD4-17_IGHJ4 (Fragment) |  | 1 | 0.84 | 0.69 |
| A0A5C2G773 | IGH c452_heavy__IGHV3-7_IGHD3-3_IGHJ4 (Fragment) |  | 3 | 1.15 | 0.74 |
| A0A5C2G781 | IGL c3567_light_IGKV1-39_IGKJ2 (Fragment) |  | 2 | 0.61 | 0.11 |
| A0A5C2G7C4 | IGH c228_heavy__IGHV3-48_IGHD5-24_IGHJ6 (Fragment) |  | 3 | 1.06 | 0.92 |
| A0A5C2G7F8 | IGL c368_light_IGLV2-11_IGLJ1 (Fragment) |  | 1 | 0.84 | 0.75 |
| A0A5C2G7G7 | IGH c373_heavy__IGHV3-23_IGHD3-10_IGHJ4 (Fragment) |  | 1 | 0.36 | 0.37 |
| A0A5C2G7G8 | IGL c3635_light_IGLV3-10_IGLJ3 (Fragment) |  | 3 | 1.16 | 0.66 |
| A0A5C2G7H3 | IGL c3697_light_IGLV6-57_IGLJ2 (Fragment) |  | 6 | 0.95 | 0.86 |
| A0A5C2G7I0 | IGL c2353_light_IGKV3-20_IGKJ3 (Fragment) |  | 1 | 0.68 | 0.53 |
| A0A5C2G7I4 | IGH c572_heavy__IGHV3-21_IGHD5-18_IGHJ5 (Fragment) |  | 1 | 0.61 | 0.43 |
| A0A5C2G7J4 | IGL c454_light_IGKV3-11_IGKJ2 (Fragment) |  | 1 | 2.39 | 0.36 |
| A0A5C2G7Q0 | IGH c398_heavy__IGHV1-24_IGHD3-10_IGHJ5 (Fragment) |  | 1 | 0.74 | 0.57 |
| A0A5C2G7R8 | IGH c557_heavy__IGHV4-34_IGHD3-9_IGHJ4 (Fragment) |  | 3 | 0.77 | 0.77 |
| A0A5C2G7T9 | IGL c2483_light_IGKV4-1_IGKJ1 (Fragment) |  | 3 | 1.11 | 0.69 |
| A0A5C2G7V5 | IGL c594_light_IGKV3-20_IGKJ1 (Fragment) |  | 1 | 0.13 | 0.40 |
| A0A5C2G7Y9 | IGH c508_heavy__IGHV3-33_IGHD1-7_IGHJ4 (Fragment) |  | 2 | 1.21 | 0.62 |
| A0A5C2G801 | IGL c3877_light_IGKV1-12_IGKJ5 (Fragment) |  | 2 | 1.02 | 0.95 |
| A0A5C2G810 | IGL c507_light_IGKV1D-39_IGKJ1 (Fragment) |  | 2 | 0.20 | 0.21 |
| A0A5C2G816 | IGH + IGL c16_heavy_IGHV3-48_IGHD3-3_IGHJ4 (Fragment) |  | 4 | 1.29 | 0.50 |
| A0A5C2G829 | IGL c527_light_IGKV1-16_IGKJ4 (Fragment) |  | 1 | 1.03 | 0.81 |
| A0A5C2G830 | IGH c558_heavy__IGHV3-43_IGHD3-10_IGHJ1 (Fragment) |  | 1 | 0.76 | 0.38 |
| A0A5C2G834 | IGL c180_light_IGLV2-18_IGLJ1 (Fragment) |  | 2 | 1.28 | 0.54 |
| A0A5C2G844 | IGL c3937_light_IGKV1D-13_IGKJ4 (Fragment) |  | 2 | 2.14 | 0.34 |
| A0A5C2G847 | IGH c578_heavy__IGHV3-74_IGHD1-26_IGHJ4 (Fragment) |  | 5 | 0.65 | 0.61 |
| A0A5C2G850 | IGH + IGL c46_heavy_IGHV3-43_IGHD6-19_IGHJ4 (Fragment) |  | 3 | 0.82 | 0.70 |
| A0A5C2G872 | IGL c220_light_IGKV1-5_IGKJ4 (Fragment) |  | 2 | 0.81 | 0.63 |
| A0A5C2G896 | IGH c154_heavy__IGHV5-51_IGHD3-16_IGHJ4 (Fragment) |  | 2 | 2.31 | 0.45 |
| A0A5C2G898 | IGL c240_light_IGKV3-20_IGKJ2 (Fragment) |  | 1 | 0.97 | 0.85 |
| A0A5C2G8C6 | IGL c56_light_IGKV3D-20_IGKJ4 (Fragment) |  | 3 | 1.03 | 0.93 |
| A0A5C2G8D9 | IGL c290_light_IGLV1-47_IGLJ2 (Fragment) |  | 3 | 1.04 | 0.80 |
| A0A5C2G8G7 | IGL c320_light_IGKV1-5_IGKJ4 (Fragment) |  | 1 | 2.04 | 0.55 |
| A0A5C2G8K6 | IGL c3975_light_IGKV3-15_IGKJ4 (Fragment) |  | 1 | 0.60 | 0.27 |
| A0A5C2G8L5 | IGL c156_light_IGLV2-23_IGLJ2 (Fragment) |  | 3 | 0.67 | 0.30 |
| A0A5C2G8N0 | IGH c284_heavy__IGHV1-69_IGHD4-4_IGHJ4 (Fragment) |  | 1 | 1.20 | 0.76 |
| A0A5C2G8R2 | IGH c314_heavy__IGHV3-30_IGHD6-6_IGHJ6 (Fragment) |  | 2 | 0.02 | 0.36 |
| A0A5C2G8S3 | IGH + IGL c73_heavy_IGHV4-39_IGHD6-19_IGHJ3 (Fragment) |  | 1 | 0.81 | 0.77 |
| A0A5C2G8S9 | IGH + IGL c230_heavy_IGHV3-33_IGHD3-10_IGHJ1 (Fragment) |  | 2 | 0.74 | 0.16 |
| A0A5C2G8W6 | IGL c276_light_IGKV1-39_IGKJ2 (Fragment) |  | 1 | 0.85 | 0.62 |
| A0A5C2G8X7 | IGL c286_light_IGKV1-5_IGKJ1 (Fragment) |  | 1 | 0.90 | 0.87 |
| A0A5C2G8X8 | IGH + IGL c290_heavy_IGHV3-30_IGHD3-3_IGHJ6 (Fragment) |  | 3 | 0.48 | 0.11 |
| A0A5C2G8Y9 | IGH + IGL c300_heavy_IGHV3-15_IGHD3-10_IGHJ4 (Fragment) |  | 4 | 0.30 | 0.29 |
| A0A5C2G8Z6 | IGL c4177_light_IGKV1D-13_IGKJ4 (Fragment) |  | 4 | 0.57 | 0.50 |
| A0A5C2G919 | IGL c540_light_IGKV1-5_IGKJ1 (Fragment) |  | 1 | 1.66 | 0.41 |
| A0A5C2G922 | IGH c434_heavy__IGHV3-49_IGHD2-21_IGHJ4 (Fragment) |  | 2 | 0.51 | 0.17 |
| A0A5C2G929 | IGL c4207_light_IGKV1-5_IGKJ3 (Fragment) |  | 3 | 0.47 | 0.40 |
| A0A5C2G943 | IGL c560_light_IGKV1-5_IGKJ3 (Fragment) |  | 2 | 0.81 | 0.39 |
| A0A5C2G947 | IGH + IGL c284_heavy_IGHV4-34_IGHD1-26_IGHJ6 (Fragment) |  | 1 | 1.22 | 0.67 |
| A0A5C2G978 | IGH + IGL c390_heavy_IGHV1-8_IGHD2-2_IGHJ5 (Fragment) |  | 2 | 1.05 | 0.92 |
| A0A5C2G984 | IGH + IGL c324_heavy_IGHV3-15_IGHD3-16_IGHJ5 (Fragment) |  | 3 | 1.06 | 0.93 |
| A0A5C2G989 | IGH + IGL c253_heavy_IGHV3-48_IGHD3-22_IGHJ4 (Fragment) |  | 1 | 6.09 | 0.40 |
| A0A5C2G9C4 | IGH + IGL c38_heavy_IGHV5-51_IGHD4-17_IGHJ4 (Fragment) |  | 1 | 1.05 | 0.71 |
| A0A5C2G9F8 | IGH + IGL c333_heavy_IGHV3-15_IGHD3-16_IGHJ4 (Fragment) |  | 2 | 2.29 | 0.06 |
| A0A5C2G9I6 | IGL c442_light_IGKV1D-39_IGKJ1 (Fragment) |  | 3 | 0.96 | 0.68 |
| A0A5C2G9L4 | IGH + IGL c494_heavy_IGHV3-9_IGHD4-11_IGHJ3 (Fragment) |  | 7 | 0.84 | 0.42 |
| A0A5C2G9L9 | IGL c556_light_IGKV3-20_IGKJ3 (Fragment) |  | 2 | 0.35 | 0.52 |
| A0A5C2G9P8 | IGL c3163_light_IGKV3-11_IGKJ5 (Fragment) |  | 2 | 0.58 | 0.57 |
| A0A5C2G9P9 | IGH + IGL c550_heavy_IGHV3-11_IGHD3-3_IGHJ6 (Fragment) |  | 1 | 0.83 | 0.60 |
| A0A5C2G9Q2 | IGL c555_light_IGKV3-11_IGKJ4 (Fragment) |  | 4 | 0.62 | 0.29 |
| A0A5C2G9R7 | IGH + IGL c554_heavy_IGHV3-53_IGHD6-13_IGHJ5 (Fragment) |  | 2 | 0.61 | 0.10 |
| A0A5C2G9U1 | IGL c152_light_IGKV1-12_IGKJ2 (Fragment) |  | 1 | 0.88 | 0.69 |
| A0A5C2G9Z5 | IGH c85_heavy__IGHV3-9_IGHD1-1_IGHJ6 (Fragment) |  | 2 | 0.91 | 0.84 |
| A0A5C2GA30 | IGH + IGL c136_heavy_IGHV3-15_IGHD4-17_IGHJ1 (Fragment) |  | 1 | 0.61 | 0.10 |
| A0A5C2GA43 | IGH + IGL c42_heavy_IGHV3-23_IGHD2-15_IGHJ5 (Fragment) |  | 2 | 2.34 | 0.13 |
| A0A5C2GA56 | IGH c145_heavy__IGHV3-20_IGHD3-10_IGHJ4 (Fragment) |  | 1 | 0.45 | 0.61 |
| A0A5C2GA59 | IGH + IGL c1_heavy_IGHV3-48_IGHD3-10_IGHJ4 (Fragment) |  | 2 | 1.04 | 0.77 |
| A0A5C2GA61 | IGL c282_light_IGKV3D-20_IGKJ1 (Fragment) |  | 1 | 1.48 | 0.28 |
| A0A5C2GA71 | IGL c292_light_IGKV1D-39_IGKJ2 (Fragment) |  | 1 | 1.23 | 0.70 |
| A0A5C2GA89 | IGH c185_heavy__IGHV3-7_IGHD3-16_IGHJ4 (Fragment) |  | 2 | 0.66 | 0.32 |
| A0A5C2GA91 | IGL c3373_light_IGKV4-1_IGKJ1 (Fragment) |  | 3 | 1.13 | 0.79 |
| A0A5C2GAA8 | IGH + IGL c71_heavy_IGHV1-46_IGHD6-25_IGHJ5 (Fragment) |  | 1 | 0.93 | 0.82 |
| A0A5C2GAB7 | IGH + IGL c62_heavy_IGHV3-7_IGHD3-22_IGHJ5 (Fragment) |  | 4 | 1.03 | 0.89 |
| A0A5C2GAC5 | IGH + IGL c72_heavy_IGHV3-23_IGHD5-24_IGHJ5 (Fragment) |  | 1 | 1.40 | 0.60 |
| A0A5C2GAF0 | IGH + IGL c182_light_IGKV3-11_IGKJ5 (Fragment) |  | 1 | 3.51 | 0.07 |
| A0A5C2GAH0 | IGH + IGL c196_light_IGKV4-1_IGKJ1 (Fragment) |  | 3 | 0.50 | 0.32 |
| A0A5C2GAK7 | IGL c462_light_IGKV3-15_IGKJ1 (Fragment) |  | 1 | 1.33 | 0.19 |
| A0A5C2GAL0 | IGH + IGL c112_heavy_IGHV3-23_IGHD5-24_IGHJ6 (Fragment) |  | 2 | 0.69 | 0.27 |
| A0A5C2GAQ1 | IGH + IGL c336_heavy_IGHV3-23_IGHD3-22_IGHJ5 (Fragment) |  | 2 | 0.66 | 0.46 |
| A0A5C2GAQ3 | IGH + IGL c282_light_IGKV4-1_IGKJ1 (Fragment) |  | 3 | 0.63 | 0.45 |
| A0A5C2GAR1 | IGH + IGL c172_heavy_IGHV3-23_IGHD2-21_IGHJ4 (Fragment) |  | 2 | 0.77 | 0.66 |
| A0A5C2GAS8 | IGH + IGL c366_heavy_IGHV3-74_IGHD2-21_IGHJ4 (Fragment) |  | 1 | 0.75 | 0.55 |
| A0A5C2GAT0 | IGH + IGL c306_light_IGKV3-20_IGKJ1 (Fragment) |  | 3 | 1.81 | 0.15 |
| A0A5C2GAT2 | IGL c3503_light_IGKV4-1_IGKJ2 (Fragment) |  | 1 | 0.87 | 0.72 |
| A0A5C2GAU8 | IGH + IGL c215_light_IGKV3-20_IGKJ1 (Fragment) |  | 1 | 0.84 | 0.57 |
| A0A5C2GAW3 | IGH c453_heavy__IGHV3-11_IGHD4-17_IGHJ3 (Fragment) |  | 3 | 0.72 | 0.39 |
| A0A5C2GAY9 | IGH c395_heavy__IGHV3-7_IGHD1-14_IGHJ4 (Fragment) |  | 1 | 0.67 | 0.57 |
| A0A5C2GAZ8 | IGH c405_heavy__IGHV3-43_IGHD3-22_IGHJ4 (Fragment) |  | 2 | 0.74 | 0.72 |
| A0A5C2GB27 | IGH + IGL c285_light_IGKV1-5_IGKJ2 (Fragment) |  | 4 | 0.72 | 0.12 |
| A0A5C2GB28 | IGL c3583_light_IGKV3D-15_IGKJ5 (Fragment) |  | 1 | 0.89 | 0.74 |
| A0A5C2GB34 | IGH c445_heavy__IGHV3-11_IGHD6-13_IGHJ4 (Fragment) |  | 2 | 0.65 | 0.26 |
| A0A5C2GB36 | IGH + IGL c295_light_IGKV4-1_IGKJ3 (Fragment) |  | 3 | 1.20 | 0.60 |
| A0A5C2GB39 | IGH + IGL c412_light_IGKV4-1_IGKJ5 (Fragment) |  | 1 | 0.82 | 0.69 |
| A0A5C2GB47 | IGH + IGL c426_light_IGKV3-20_IGKJ3 (Fragment) |  | 1 | 0.97 | 0.96 |
| A0A5C2GB67 | IGH + IGL c442_light_IGKV2-28_IGKJ2 (Fragment) |  | 1 | 1.32 | 0.85 |
| A0A5C2GBB3 | IGH + IGL c496_light_IGLV1-51_IGLJ2 (Fragment) |  | 2 | 2.74 | 0.40 |
| A0A5C2GBB4 | IGH + IGL c375_light_IGKV1-33_IGKJ4 (Fragment) |  | 1 | 0.74 | 0.35 |
| A0A5C2GBB8 | IGH + IGL c8_heavy_IGHV1-2_IGHD3-10_IGHJ6 (Fragment) |  | 1 | 1.10 | 0.64 |
| A0A5C2GBC3 | IGH + IGL c506_light_IGKV3-20_IGKJ4 (Fragment) |  | 1 | 1.18 | 0.34 |
| A0A5C2GBI5 | IGL c71_light_IGLV3-21_IGLJ1 (Fragment) |  | 2 | 0.84 | 0.76 |
| A0A5C2GBL2 | IGH + IGL c475_light_IGKV3-20_IGKJ2 (Fragment) |  | 3 | 2.80 | 0.48 |
| A0A5C2GBL4 | IGH + IGL c8_light_IGLV2-14_IGLJ3 (Fragment) |  | 2 | 1.76 | 0.45 |
| A0A5C2GBM2 | IGH + IGL c118_heavy_IGHV1-8_IGHD3-3_IGHJ5 (Fragment) |  | 1 | 0.65 | 0.07 |
| A0A5C2GBM4 | IGH + IGL c591_heavy_IGHV1-69_IGHD3-16_IGHJ6 (Fragment) |  | 2 | 0.67 | 0.50 |
| A0A5C2GBN2 | IGH + IGL c601_heavy_IGHV1-69_IGHD2-8_IGHJ4 (Fragment) |  | 2 | 0.73 | 0.59 |
| A0A5C2GBP5 | IGH + IGL c515_light_IGLV3-25_IGLJ1 (Fragment) |  | 4 | 0.91 | 0.65 |
| A0A5C2GBQ0 | IGL c73_light_IGKV1D-13_IGKJ1 (Fragment) |  | 1 | 1.18 | 0.70 |
| A0A5C2GBR3 | IGH + IGL c492_heavy_IGHV3-20_IGHD3-22_IGHJ4 (Fragment) |  | 2 | 1.58 | 0.26 |
| A0A5C2GBS4 | IGH + IGL c88_light_IGKV3-20_IGKJ4 (Fragment) |  | 2 | 1.89 | 0.06 |
| A0A5C2GBW7 | IGH + IGL c595_light_IGKV1-5_IGKJ4 (Fragment) |  | 1 | 0.67 | 0.28 |
| A0A5C2GBZ9 | IGH + IGL c178_light_IGKV3-15_IGKJ5 (Fragment) |  | 2 | 0.76 | 0.28 |
| A0A5C2GC00 | IGH + IGL c93_light_IGKV1-5_IGKJ1 (Fragment) |  | 2 | 1.18 | 0.62 |
| A0A5C2GC49 | IGH + IGL c153_light_IGKV3-20_IGKJ4 (Fragment) |  | 2 | 0.72 | 0.50 |
| A0A5C2GC60 | IGL c291_light_IGKV1D-39_IGKJ1 (Fragment) |  | 1 | 0.50 | 0.42 |
| A0A5C2GC74 | IGL c311_light_IGKV1-5_IGKJ2 (Fragment) |  | 1 | 0.83 | 0.60 |
| A0A5C2GC79 | IGH + IGL c193_light_IGLV3-25_IGLJ3 (Fragment) |  | 1 | 1.22 | 0.56 |
| A0A5C2GCF4 | IGH + IGL c358_light_IGKV3-15_IGKJ1 (Fragment) |  | 3 | 2.30 | 0.30 |
| A0A5C2GCI4 | IGH + IGL c458_heavy_IGHV3-30_IGHD3-16_IGHJ3 (Fragment) |  | 1 | 1.57 | 0.09 |
| A0A5C2GCJ9 | IGL c313_light_IGKV1D-17_IGKJ3 (Fragment) |  | 3 | 1.08 | 0.70 |
| A0A5C2GCK5 | IGH + IGL c478_heavy_IGHV3-21_IGHD6-19_IGHJ6 (Fragment) |  | 2 | 0.96 | 0.93 |
| A0A5C2GCK8 | IGL c323_light_IGLV7-43_IGLJ2 (Fragment) |  | 1 | 0.84 | 0.64 |
| A0A5C2GCL4 | IGH + IGL c488_heavy_IGHV5-51_IGHD3-10_IGHJ6 (Fragment) |  | 2 | 0.47 | 0.09 |
| A0A5C2GCN1 | IGH + IGL c438_light_IGLV1-47_IGLJ3 (Fragment) |  | 2 | 2.51 | 0.20 |
| A0A5C2GCN9 | IGH + IGL c448_light_IGKV3-20_IGKJ5 (Fragment) |  | 1 | 0.65 | 0.41 |
| A0A5C2GCQ3 | IGH + IGL c373_light_IGLV1-47_IGLJ3 (Fragment) |  | 2 | 0.83 | 0.70 |
| A0A5C2GCQ4 | IGH + IGL c468_light_IGLV3-25_IGLJ3 (Fragment) |  | 3 | 2.65 | 0.35 |
| A0A5C2GCU1 | IGL c4153_light_IGKV3-20_IGKJ4 (Fragment) |  | 2 | 1.24 | 0.61 |
| A0A5C2GCV4 | IG c733_heavy_IGHV1-18_IGHD6-19_IGHJ4 (Fragment) |  | 3 | 1.05 | 0.95 |
| A0A5C2GCV9 | IGL c561_light_IGLV1-44_IGLJ3 (Fragment) |  | 4 | 0.69 | 0.21 |
| A0A5C2GCX0 | IGL c571_light_IGKV1-12_IGKJ5 (Fragment) |  | 1 | 2.17 | 0.48 |
| A0A5C2GCY9 | IGH + IGL c558_light_IGKV1-12_IGKJ4 (Fragment) |  | 2 | 0.78 | 0.42 |
| A0A5C2GD14 | IG c725_heavy_IGHV1-18_IGHD6-6_IGHJ4 (Fragment) |  | 2 | 0.83 | 0.78 |
| A0A5C2GD17 | IGL c483_light_IGKV3D-20_IGKJ1 (Fragment) |  | 1 | 0.83 | 0.52 |
| A0A5C2GD51 | IGH + IGL c20_light_IGLV1-51_IGLJ3 (Fragment) |  | 6 | 1.08 | 0.91 |
| A0A5C2GD57 | IGH + IGL c628_light_IGLV2-14_IGLJ1 (Fragment) |  | 2 | 1.15 | 0.85 |
| A0A5C2GD82 | IGH + IGL c424_light_IGLV2-23_IGLJ2 (Fragment) |  | 1 | 1.53 | 0.48 |
| A0A5C2GD92 | IGH + IGL c434_light_IGKV1-5_IGKJ1 (Fragment) |  | 1 | 0.75 | 0.36 |
| A0A5C2GDI2 | IGH c31_heavy__IGHV5-51_IGHD3-16_IGHJ4 (Fragment) |  | 2 | 0.62 | 0.30 |
| A0A5C2GDK5 | IGH + IGL c180_light_IGKV3-15_IGKJ3 (Fragment) |  | 2 | 6.56 | 0.13 |
| A0A5C2GDK6 | IGH + IGL c45_light_IGLV1-44_IGLJ2 (Fragment) |  | 2 | 0.55 | 0.06 |
| A0A5C2GDM9 | IGH c71_heavy__IGHV3-7_IGHD4-23_IGHJ3 (Fragment) |  | 3 | 0.65 | 0.13 |
| A0A5C2GDN3 | IG c481_heavy_IGHV3-11_IGHD3-22_IGHJ4 (Fragment) |  | 3 | 0.54 | 0.31 |
| A0A5C2GDS5 | IG c206_heavy_IGHV3-15_IGHD4-17_IGHJ6 (Fragment) |  | 3 | 0.94 | 0.81 |
| A0A5C2GDT6 | IGH + IGL c79_heavy_IGHV2-5_IGHD4-17_IGHJ2 (Fragment) |  | 2 | 1.16 | 0.57 |
| A0A5C2GDU0 | IGH c141_heavy__IGHV5-51_IGHD3-22_IGHJ4 (Fragment) |  | 3 | 0.47 | 0.16 |
| A0A5C2GDU6 | IG c1122_heavy_IGHV3-13_IGHD2-15_IGHJ6 (Fragment) |  | 2 | 0.58 | 0.08 |
| A0A5C2GDV0 | IGH + IGL c280_light_IGKV1D-33_IGKJ4 (Fragment) |  | 1 | 0.67 | 0.45 |
| A0A5C2GDV9 | IG c1211_heavy_IGHV3-20_IGHD6-13_IGHJ4 (Fragment) |  | 2 | 1.04 | 0.90 |
| A0A5C2GDW0 | IGH + IGL c207_heavy_IGHV3-53_IGHD2-8_IGHJ2 (Fragment) |  | 1 | 0.73 | 0.44 |
| A0A5C2GDX1 | IGH + IGL c119_heavy_IGHV3-30_IGHD4-17_IGHJ4 (Fragment) |  | 4 | 1.00 | 1.00 |
| A0A5C2GDX4 | IG c1088_heavy_IGHV3-15_IGHD2-15_IGHJ4 (Fragment) |  | 1 | 1.39 | 0.50 |
| A0A5C2GDY1 | IG c754_heavy_IGHV3-20_IGHD3-3_IGHJ4 (Fragment) |  | 1 | 0.83 | 0.54 |
| A0A5C2GDY8 | IGH + IGL c247_heavy_IGHV3-48_IGHD3-9_IGHJ6 (Fragment) |  | 1 | 0.34 | 0.43 |
| A0A5C2GDY9 | IG c42_heavy_IGHV3-21_IGHD6-19_IGHJ4 (Fragment) |  | 1 | 0.69 | 0.23 |
| A0A5C2GDZ4 | IG c342_heavy_IGHV3-21_IGHD3-9_IGHJ4 (Fragment) |  | 2 | 0.61 | 0.41 |
| A0A5C2GDZ5 | IGH + IGL c257_heavy_IGHV4-34_IGHD4-23_IGHJ3 (Fragment) |  | 2 | 0.93 | 0.74 |
| A0A5C2GDZ7 | IGH c221_heavy__IGHV3-48_IGHD4-23_IGHJ6 (Fragment) |  | 2 | 1.18 | 0.80 |
| A0A5C2GE11 | IG c756_heavy_IGHV3-21_IGHD7-27_IGHJ4 (Fragment) |  | 1 | 1.14 | 0.81 |
| A0A5C2GE26 | IG c1327_heavy_IGHV3-21_IGHD3-3_IGHJ6 (Fragment) |  | 2 | 0.98 | 0.83 |
| A0A5C2GE41 | IG c125_heavy_IGHV3-23_IGHD2-8_IGHJ4 (Fragment) |  | 2 | 0.74 | 0.46 |
| A0A5C2GE53 | IGH + IGL c327_heavy_IGHV3-21_IGHD6-6_IGHJ2 (Fragment) |  | 3 | 1.27 | 0.84 |
| A0A5C2GE58 | IG c273_heavy_IGHV3-23_IGHD3-22_IGHJ5 (Fragment) |  | 1 | 0.32 | 0.53 |
| A0A5C2GE65 | IG c1144_heavy_IGHV3-23_IGHD6-13_IGHJ3 (Fragment) |  | 3 | 0.95 | 0.89 |
| A0A5C2GE75 | IG c662_heavy_IGHV3-23_IGHD1-26_IGHJ4 (Fragment) |  | 3 | 0.56 | 0.21 |
| A0A5C2GE84 | IG c90_heavy_IGHV3-30_IGHD5-18_IGHJ5 (Fragment) |  | 1 | 1.06 | 0.85 |
| A0A5C2GE94 | IG c1052_heavy_IGHV3-23_IGHD6-13_IGHJ4 (Fragment) |  | 3 | 0.46 | 0.34 |
| A0A5C2GE95 | IGH + IGL c440_light_IGKV1D-39_IGKJ2 (Fragment) |  | 1 | 1.72 | 0.14 |
| A0A5C2GE99 | IG c1196_heavy_IGHV3-23_IGHD6-19_IGHJ4 (Fragment) |  | 2 | 1.02 | 0.97 |
| A0A5C2GEA7 | IG c1314_heavy_IGHV3-23_IGHD3-10_IGHJ4 (Fragment) |  | 2 | 0.48 | 0.31 |
| A0A5C2GEH1 | IG c1238_heavy_IGHV3-30_IGHD4-11_IGHJ4 (Fragment) |  | 6 | 0.60 | 0.32 |
| A0A5C2GEI8 | IGH c441_heavy__IGHV3-72_IGHD3-22_IGHJ4 (Fragment) |  | 3 | 0.55 | 0.31 |
| A0A5C2GEJ3 | IG c1203_heavy_IGHV3-23_IGHD5-12_IGHJ3 (Fragment) |  | 2 | 0.75 | 0.56 |
| A0A5C2GEJ5 | IGH + IGL c477_heavy_IGHV1-69_IGHD4-17_IGHJ3 (Fragment) |  | 1 | 0.62 | 0.05 |
| A0A5C2GEM5 | IG c156_heavy_IGHV1-18_IGHD6-6_IGHJ4 (Fragment) |  | 1 | 1.77 | 0.06 |
| A0A5C2GER5 | IG c1063_heavy_IGHV3-33_IGHD1-1_IGHJ3 (Fragment) |  | 2 | 1.13 | 0.67 |
| A0A5C2GET5 | IG c120_heavy_IGHV3-49_IGHD2-2_IGHJ3 (Fragment) |  | 1 | 0.20 | 0.39 |
| A0A5C2GEU1 | IGH + IGL c399_heavy_IGHV3-48_IGHD4-17_IGHJ6 (Fragment) |  | 1 | 0.92 | 0.84 |
| A0A5C2GEU3 | IG c810_heavy_IGHV3-49_IGHD7-27_IGHJ6 (Fragment) |  | 6 | 0.69 | 0.61 |
| A0A5C2GEV4 | IG c952_heavy_IGHV3-48_IGHD6-19_IGHJ4 (Fragment) |  | 2 | 0.81 | 0.29 |
| A0A5C2GEW0 | IG c275_heavy_IGHV3-33_IGHD3-3_IGHJ4 (Fragment) |  | 1 | 5.48 | 0.33 |
| A0A5C2GEW6 | IG c77_heavy_IGHV3-11_IGHD2-2_IGHJ6 (Fragment) |  | 1 | 0.66 | 0.31 |
| A0A5C2GEX7 | IG c378_heavy_IGHV3-11_IGHD4-17_IGHJ4 (Fragment) |  | 3 | 12.67 | 0.13 |
| A0A5C2GEZ0 | IG c250_heavy_IGHV3-66_IGHD6-13_IGHJ3 (Fragment) |  | 1 | 1.20 | 0.11 |
| A0A5C2GF02 | IGH + IGL c459_heavy_IGHV3-23_IGHD6-19_IGHJ4 (Fragment) |  | 1 | 0.55 | 0.26 |
| A0A5C2GF06 | IG c1227_heavy_IGHV1-18_IGHD4-23_IGHJ4 (Fragment) |  | 1 | 0.74 | 0.77 |
| A0A5C2GF35 | IG c13_heavy_IGHV3-15_IGHD3-3_IGHJ4 (Fragment) |  | 1 | 0.16 | 0.38 |
| A0A5C2GF44 | IG c1250_heavy_IGHV3-15_IGHD1-26_IGHJ2 (Fragment) |  | 5 | 0.95 | 0.85 |
| A0A5C2GF46 | IG c1011_heavy_IGHV3-7_IGHD3-3_IGHJ1 (Fragment) |  | 1 | 0.94 | 0.87 |
| A0A5C2GF48 | IG c1070_heavy_IGHV3-74_IGHD2-15_IGHJ2 (Fragment) |  | 3 | 2.52 | 0.06 |
| A0A5C2GF54 | IG c990_heavy_IGHV3-20_IGHD5-18_IGHJ3 (Fragment) |  | 2 | 2.00 | 0.34 |
| A0A5C2GF65 | IG c111_heavy_IGHV3-21_IGHD4-11_IGHJ4 (Fragment) |  | 3 | 1.83 | 0.43 |
| A0A5C2GF85 | IG c316_heavy_IGHV3-9_IGHD3-3_IGHJ4 (Fragment) |  | 1 | 2.60 | 0.20 |
| A0A5C2GFC3 | IG c332_heavy_IGHV3-7_IGHD2-15_IGHJ1 (Fragment) |  | 3 | 0.58 | 0.37 |
| A0A5C2GFE8 | IG c282_heavy_IGHV3-23_IGHD3-22_IGHJ4 (Fragment) |  | 3 | 0.67 | 0.24 |
| A0A5C2GFF3 | IG c1142_heavy_IGHV3-73_IGHD3-22_IGHJ4 (Fragment) |  | 2 | 0.58 | 0.17 |
| A0A5C2GFF7 | IG c500_heavy_IGHV3-23_IGHD6-19_IGHJ4 (Fragment) |  | 1 | 1.83 | 0.55 |
| A0A5C2GFG2 | IG c536_heavy_IGHV3-74_IGHD3-3_IGHJ6 (Fragment) |  | 2 | 0.95 | 0.90 |
| A0A5C2GFH2 | IG c1172_heavy_IGHV3-74_IGHD3-16_IGHJ3 (Fragment) |  | 4 | 1.88 | 0.41 |
| A0A5C2GFH4 | IG c410_heavy_IGHV3-23_IGHD2-21_IGHJ4 (Fragment) |  | 1 | 0.07 | 0.50 |
| A0A5C2GFJ7 | IGH + IGL c139_light_IGKV1D-39_IGKJ4 (Fragment) |  | 1 | 1.65 | 0.27 |
| A0A5C2GFK6 | IGL c169_light_IGKV3-20_IGKJ2 (Fragment) |  | 3 | 1.59 | 0.31 |
| A0A5C2GFM2 | IG c906_heavy_IGHV3-11_IGHD3-22_IGHJ4 (Fragment) |  | 2 | 1.02 | 0.92 |
| A0A5C2GFQ0 | IGL c219_light_IGLV1-40_IGLJ3 (Fragment) |  | 1 | 0.31 | 0.17 |
| A0A5C2GFR0 | IG c141_heavy_IGHV3-13_IGHD3-10_IGHJ6 (Fragment) |  | 1 | 0.92 | 0.70 |
| A0A5C2GFS6 | IG c512_heavy_IGHV3-20_IGHD5-18_IGHJ5 (Fragment) |  | 2 | 0.36 | 0.22 |
| A0A5C2GFT3 | IG c966_heavy_IGHV4-34_IGHD6-13_IGHJ4 (Fragment) |  | 1 | 3.85 | 0.29 |
| A0A5C2GFU1 | IG c675_heavy_IGHV3-15_IGHD5-24_IGHJ3 (Fragment) |  | 2 | 1.85 | 0.52 |
| A0A5C2GFV6 | IG c1073_heavy_IGHV3-15_IGHD3-22_IGHJ5 (Fragment) |  | 12 | 0.81 | 0.57 |
| A0A5C2GFX1 | IG c914_heavy_IGHV3-21_IGHD6-13_IGHJ4 (Fragment) |  | 2 | 0.08 | 0.37 |
| A0A5C2GG03 | IGH + IGL c101_light_IGLV1-47_IGLJ3 (Fragment) |  | 1 | 0.55 | 0.33 |
| A0A5C2GG46 | IGL c389_light_IGKV1D-39_IGKJ1 (Fragment) |  | 2 | 0.10 | 0.13 |
| A0A5C2GG66 | IG c858_heavy_IGHV3-21_IGHD5-18_IGHJ5 (Fragment) |  | 2 | 0.59 | 0.34 |
| A0A5C2GG86 | IG c359_heavy_IGHV3-30_IGHD3-22_IGHJ4 (Fragment) |  | 1 | 0.53 | 0.16 |
| A0A5C2GG87 | IGH + IGL c399_light_IGLV1-40_IGLJ1 (Fragment) |  | 1 | 1.22 | 0.40 |
| A0A5C2GG88 | IG c54_heavy_IGHV3-23_IGHD3-22_IGHJ4 (Fragment) |  | 1 | 0.93 | 0.75 |
| A0A5C2GGD3 | IGH + IGL c231_light_IGKV1D-33_IGKJ4 (Fragment) |  | 3 | 0.67 | 0.46 |
| A0A5C2GGE7 | IG c691_heavy_IGHV4-59B_IGHD3-9_IGHJ2 (Fragment) |  | 2 | 0.84 | 0.87 |
| A0A5C2GGG9 | IG c256_heavy_IGHV3-33_IGHD3-9_IGHJ6 (Fragment) |  | 1 | 1.54 | 0.39 |
| A0A5C2GGH5 | IG c1305_heavy_IGHV3-23_IGHD3-9_IGHJ4 (Fragment) |  | 1 | 0.98 | 0.97 |
| A0A5C2GGI7 | IGH + IGL c519_light_IGKV1-5_IGKJ4 (Fragment) |  | 2 | 1.21 | 0.68 |
| A0A5C2GGJ7 | IG c872_heavy_IGHV3-33_IGHD6-6_IGHJ5 (Fragment) |  | 5 | 2.17 | 0.06 |
| A0A5C2GGM0 | IG c55_heavy_IGHV3-48_IGHD3-10_IGHJ3 (Fragment) |  | 5 | 0.25 | 0.37 |
| A0A5C2GGP0 | IGH + IGL c589_light_IGKV1D-33_IGKJ4 (Fragment) |  | 1 | 1.27 | 0.63 |
| A0A5C2GGR9 | IG c30_heavy_IGHV3-23_IGHD2-2_IGHJ3 (Fragment) |  | 2 | 0.88 | 0.63 |
| A0A5C2GGS9 | IG c79_heavy_IGHV3-23_IGHD5-24_IGHJ5 (Fragment) |  | 1 | 0.85 | 0.70 |
| A0A5C2GGW2 | IG c515_heavy_IGHV3-23_IGHD4-17_IGHJ3 (Fragment) |  | 3 | 0.72 | 0.55 |
| A0A5C2GGW4 | IG c1246_heavy_IGHV3-30_IGHD2-21_IGHJ4 (Fragment) |  | 2 | 0.63 | 0.15 |
| A0A5C2GGX3 | IGH + IGL c31_light_IGLV3-9_IGLJ2 (Fragment) |  | 4 | 0.75 | 0.76 |
| A0A5C2GGY8 | IGH + IGL c451_light_IGLV1-51_IGLJ2 (Fragment) |  | 2 | 0.94 | 0.80 |
| A0A5C2GH46 | IG c421_heavy_IGHV3-48_IGHD1-26_IGHJ4 (Fragment) |  | 2 | 0.93 | 0.91 |
| A0A5C2GH60 | IG c544_heavy_IGHV3-7_IGHD3-3_IGHJ3 (Fragment) |  | 3 | 0.78 | 0.32 |
| A0A5C2GH64 | IG c1150_light_IGLV3-25_IGLJ3 (Fragment) |  | 3 | 0.46 | 0.38 |
| A0A5C2GH70 | IG c941_heavy_IGHV3-7_IGHD3-3_IGHJ6 (Fragment) |  | 2 | 0.67 | 0.42 |
| A0A5C2GH71 | IGH + IGL c85_heavy_IGHV4-39_IGHD6-19_IGHJ1 (Fragment) |  | 3 | 1.54 | 0.41 |
| A0A5C2GH77 | IG c1282_light_IGKV1-5_IGKJ2 (Fragment) |  | 2 | 0.57 | 0.60 |
| A0A5C2GH97 | IG c1099_heavy_IGHV3-74_IGHD3-3_IGHJ6 (Fragment) |  | 1 | 0.74 | 0.45 |
| A0A5C2GHA5 | IG c447_heavy_IGHV3-53_IGHD5-12_IGHJ2 (Fragment) |  | 1 | 1.02 | 0.84 |
| A0A5C2GHB7 | IG c677_heavy_IGHV3-9_IGHD6-13_IGHJ4 (Fragment) |  | 2 | 0.66 | 0.45 |
| A0A5C2GHD1 | IG c462_light_IGKV1D-39_IGKJ2 (Fragment) |  | 2 | 0.91 | 0.46 |
| A0A5C2GHD2 | IGH + IGL c145_heavy_IGHV3-15_IGHD3-10_IGHJ4 (Fragment) |  | 2 | 0.59 | 0.29 |
| A0A5C2GHH5 | IG c550_heavy_IGHV3-73_IGHD3-3_IGHJ4 (Fragment) |  | 2 | 0.64 | 0.28 |
| A0A5C2GHK7 | IG c383_heavy_IGHV5-51_IGHD3-3_IGHJ6 (Fragment) |  | 1 | 0.93 | 0.89 |
| A0A5C2GHQ0 | IG c366_light_IGLV1-44_IGLJ2 (Fragment) |  | 1 | 0.39 | 0.08 |
| A0A5C2GHR5 | IG c336_heavy_IGHV3-53_IGHD2-8_IGHJ3 (Fragment) |  | 4 | 1.17 | 0.78 |
| A0A5C2GHS8 | IGH + IGL c295_heavy_IGHV3-21_IGHD2-15_IGHJ4 (Fragment) |  | 1 | 0.60 | 0.42 |
| A0A5C2GHT7 | IG c1037_heavy_IGHV3-53_IGHD5-24_IGHJ4 (Fragment) |  | 1 | 0.93 | 0.89 |
| A0A5C2GHU1 | IG c789_heavy_IGHV1-18_IGHD3-22_IGHJ3 (Fragment) |  | 2 | 0.76 | 0.56 |
| A0A5C2GHU5 | IGH + IGL c315_heavy_IGHV3-11_IGHD3-3_IGHJ2 (Fragment) |  | 3 | 8.06 | 0.38 |
| A0A5C2GHW5 | IG c466_light_IGKV2-30_IGKJ2 (Fragment) |  | 8 | 5.64 | 0.31 |
| A0A5C2GHW9 | IG c507_heavy_IGHV3-7_IGHD3-3_IGHJ4 (Fragment) |  | 5 | 0.67 | 0.17 |
| A0A5C2GHX6 | IG c1219_light_IGLV3-25_IGLJ1 (Fragment) |  | 4 | 0.68 | 0.45 |
| A0A5C2GHY4 | IG c1233_heavy_IGHV3-7_IGHD2-8_IGHJ4 (Fragment) |  | 2 | 0.84 | 0.41 |
| A0A5C2GI16 | IGH + IGL c395_heavy_IGHV3-15_IGHD4-17_IGHJ4 (Fragment) |  | 2 | 0.80 | 0.71 |
| A0A5C2GI17 | IG c341_heavy_IGHV4-39_IGHD6-6_IGHJ4 (Fragment) |  | 2 | 0.87 | 0.86 |
| A0A5C2GI26 | IG c576_light_IGLV1-47_IGLJ3 (Fragment) |  | 2 | 1.78 | 0.30 |
| A0A5C2GI81 | IG c346_heavy_IGHV4-34_IGHD3-22_IGHJ4 (Fragment) |  | 3 | 0.76 | 0.73 |
| A0A5C2GI95 | IG c494_light_IGKV1-5_IGKJ2 (Fragment) |  | 2 | 0.19 | 0.21 |
| A0A5C2GIB0 | IG c739_light_IGKV4-1_IGKJ4 (Fragment) |  | 2 | 0.73 | 0.47 |
| A0A5C2GIF2 | IG c198_heavy_IGHV5-51_IGHD7-27_IGHJ6 (Fragment) |  | 2 | 0.94 | 0.86 |
| A0A5C2GIH6 | IG c1031_heavy_IGHV5-51_IGHD4-17_IGHJ4 (Fragment) |  | 1 | 0.59 | 0.23 |
| A0A5C2GII4 | IG c1174_heavy_IGHV1-18_IGHD4-17_IGHJ4 (Fragment) |  | 2 | 0.75 | 0.61 |
| A0A5C2GII9 | IG c1081_light_IGKV1-8_IGKJ4 (Fragment) |  | 2 | 0.55 | 0.21 |
| A0A5C2GIK6 | IG c1053_heavy_IGHV3-11_IGHD5-18_IGHJ4 (Fragment) |  | 1 | 1.77 | 0.66 |
| A0A5C2GIP2 | IG c31_light_IGLV2-14_IGLJ1 (Fragment) |  | 8 | 0.41 | 0.28 |
| A0A5C2GIP7 | IG c88_light_IGLV3-25_IGLJ2 (Fragment) |  | 1 | 0.83 | 0.69 |
| A0A5C2GIR5 | IG c1113_light_IGKV3-20_IGKJ4 (Fragment) |  | 5 | 2.27 | 0.10 |
| A0A5C2GIT4 | IG c17_heavy_IGHV5-51_IGHD5-12_IGHJ6 (Fragment) |  | 2 | 0.16 | 0.43 |
| A0A5C2GIT5 | IG c402_heavy_IGHV3-21_IGHD2-15_IGHJ1 (Fragment) |  | 4 | 0.63 | 0.12 |
| A0A5C2GIV6 | IG c452_heavy_IGHV5-51_IGHD7-27_IGHJ6 (Fragment) |  | 1 | 0.47 | 0.30 |
| A0A5C2GIV9 | IG c1007_heavy_IGHV3-21_IGHD2-2_IGHJ6 (Fragment) |  | 3 | 0.60 | 0.26 |
| A0A5C2GIW2 | IG c796_light_IGKV3-15_IGKJ2 (Fragment) |  | 8 | 0.67 | 0.44 |
| A0A5C2GIX7 | IG c873_light_IGLV3-25_IGLJ1 (Fragment) |  | 3 | 1.05 | 0.74 |
| A0A5C2GIZ5 | IG c1308_heavy_IGHV5-51_IGHD3-22_IGHJ4 (Fragment) |  | 8 | 1.09 | 0.84 |
| A0A5C2GJ22 | IG c699_heavy_IGHV3-23_IGHD3-10_IGHJ4 (Fragment) |  | 2 | 0.98 | 0.95 |
| A0A5C2GJ23 | IG c428_light_IGKV2-30_IGKJ2 (Fragment) |  | 2 | 0.73 | 0.33 |
| A0A5C2GJ27 | IG c158_heavy_IGHV5-51_IGHD4-23_IGHJ5 (Fragment) |  | 2 | 1.27 | 0.46 |
| A0A5C2GJ30 | IG c883_heavy_IGHV3-23_IGHD7-27_IGHJ4 (Fragment) |  | 1 | 1.65 | 0.57 |
| A0A5C2GJ35 | IG c883_light_IGKV1-16_IGKJ4 (Fragment) |  | 5 | 2.04 | 0.10 |
| A0A5C2GJ51 | IG c360_light_IGKV3-20_IGKJ2 (Fragment) |  | 1 | 1.05 | 0.91 |
| A0A5C2GJ89 | IG c995_light_IGKV3-11_IGKJ4 (Fragment) |  | 3 | 1.24 | 0.61 |
| A0A5C2GJA2 | IG c484_light_IGLV3-9_IGLJ3 (Fragment) |  | 3 | 0.49 | 0.39 |
| A0A5C2GJB9 | IG c564_heavy_IGHV3-15_IGHD1-1_IGHJ5 (Fragment) |  | 1 | 0.98 | 0.94 |
| A0A5C2GJC9 | IGH + IGL c107_light_IGKV2-30_IGKJ3 (Fragment) |  | 1 | 0.99 | 0.97 |
| A0A5C2GJH6 | IG c913_light_IGKV3-20_IGKJ2 (Fragment) |  | 1 | 1.33 | 0.14 |
| A0A5C2GJH7 | IGH + IGL c157_light_IGLV1-51_IGLJ3 (Fragment) |  | 2 | 1.29 | 0.09 |
| A0A5C2GJK5 | IG c281_light_IGKV3-15_IGKJ4 (Fragment) |  | 3 | 0.40 | 0.40 |
| A0A5C2GJK7 | IG c545_heavy_IGHV3-48_IGHD2-8_IGHJ3 (Fragment) |  | 1 | 1.06 | 0.85 |
| A0A5C2GJK9 | IG c95_heavy_IGHV3-23_IGHD6-25_IGHJ4 (Fragment) |  | 1 | 0.52 | 0.37 |
| A0A5C2GJN9 | IG c314_light_IGKV1-12_IGKJ1 (Fragment) |  | 1 | 0.58 | 0.20 |
| A0A5C2GJP9 | IG c1141_heavy_IGHV3-49_IGHD3-10_IGHJ6 (Fragment) |  | 2 | 2.87 | 0.32 |
| A0A5C2GJQ5 | IG c477_light_IGLV1-40_IGLJ3 (Fragment) |  | 2 | 1.65 | 0.42 |
| A0A5C2GJR5 | IG c837_light_IGKV1-39_IGKJ2 (Fragment) |  | 5 | 0.53 | 0.62 |
| A0A5C2GJT2 | IG c1158_heavy_IGHV3-64_IGHD2-2_IGHJ4 (Fragment) |  | 3 | 0.63 | 0.38 |
| A0A5C2GJW4 | IG c1105_light_IGLV8-61_IGLJ2 (Fragment) |  | 3 | 0.92 | 0.91 |
| A0A5C2GK01 | IG c1003_heavy_IGHV3-30_IGHD5-12_IGHJ6 (Fragment) |  | 1 | 1.04 | 0.91 |
| A0A5C2GK12 | IG c1202_heavy_IGHV3-9_IGHD1-7_IGHJ3 (Fragment) |  | 2 | 1.09 | 0.87 |
| A0A5C2GK31 | IG c519_light_IGKV3-15_IGKJ4 (Fragment) |  | 1 | 1.97 | 0.63 |
| A0A5C2GK68 | IG c744_light_IGLV1-51_IGLJ2 (Fragment) |  | 1 | 1.65 | 0.35 |
| A0A5C2GK73 | IG c472_heavy_IGHV4-34_IGHD1-20_IGHJ4 (Fragment) |  | 1 | 0.69 | 0.53 |
| A0A5C2GK96 | IG c423_light_IGKV4-1_IGKJ2 (Fragment) |  | 1 | 1.77 | 0.49 |
| A0A5C2GKB5 | IG c928_light_IGKV3-20_IGKJ1 (Fragment) |  | 3 | 1.02 | 0.98 |
| A0A5C2GKC3 | IG c1254_light_IGLV6-57_IGLJ2 (Fragment) |  | 1 | 0.86 | 0.68 |
| A0A5C2GKD9 | IG c15_heavy_IGHV3-74_IGHD3-9_IGHJ4 (Fragment) |  | 3 | 0.56 | 0.48 |
| A0A5C2GKG3 | IG c273_light_IGKV1-6_IGKJ1 (Fragment) |  | 1 | 1.56 | 0.06 |
| A0A5C2GKH6 | IG c1226_heavy_IGHV3-53_IGHD5-12_IGHJ4 (Fragment) |  | 1 | 1.13 | 0.82 |
| A0A5C2GKJ6 | IG c1205_heavy_IGHV3-66_IGHD1-7_IGHJ4 (Fragment) |  | 1 | 1.53 | 0.14 |
| A0A5C2GKJ7 | IG c881_light_IGLV2-11_IGLJ3 (Fragment) |  | 2 | 1.47 | 0.14 |
| A0A5C2GKJ9 | IG c85_heavy_IGHV1-8_IGHD3-3_IGHJ6 (Fragment) |  | 1 | 1.46 | 0.43 |
| A0A5C2GKN5 | IG c369_heavy_IGHV3-74_IGHD1-26_IGHJ4 (Fragment) |  | 1 | 0.07 | 0.13 |
| A0A5C2GKP3 | IG c125_heavy_IGHV3-7_IGHD3-3_IGHJ3 (Fragment) |  | 2 | 0.63 | 0.54 |
| A0A5C2GKP8 | IGH + IGL c617_light_IGKV1-33_IGKJ4 (Fragment) |  | 1 | 0.82 | 0.64 |
| A0A5C2GKQ7 | IG c447_light_IGLV3-21_IGLJ3 (Fragment) |  | 2 | 2.71 | 0.35 |
| A0A5C2GKT0 | IG c944_light_IGKV1-5_IGKJ1 (Fragment) |  | 2 | 0.76 | 0.54 |
| A0A5C2GKT6 | IG c513_heavy_IGHV4-31_IGHD5-24_IGHJ2 (Fragment) |  | 2 | 0.97 | 0.97 |
| A0A5C2GKU4 | IG c741_light_IGKV3-20_IGKJ2 (Fragment) |  | 1 | 0.82 | 0.10 |
| A0A5C2GKU9 | IG c56_light_IGKV4-1_IGKJ2 (Fragment) |  | 2 | 1.20 | 0.76 |
| A0A5C2GL28 | IG c26_heavy_IGHV3-7_IGHD6-13_IGHJ4 (Fragment) |  | 4 | 0.72 | 0.37 |
| A0A5C2GL66 | IG c272_heavy_IGHV3-48_IGHD2-15_IGHJ6 (Fragment) |  | 1 | 0.76 | 0.44 |
| A0A5C2GL83 | IG c76_heavy_IGHV6-1_IGHD1-1_IGHJ3 (Fragment) |  | 4 | 0.61 | 0.21 |
| A0A5C2GL85 | IG c1069_light_IGKV3-20_IGKJ2 (Fragment) |  | 2 | 0.19 | 0.39 |
| A0A5C2GL87 | IG c1157_light_IGKV3-20_IGKJ2 (Fragment) |  | 3 | 0.08 | 0.38 |
| A0A5C2GLB9 | IG c824_light_IGLV1-44_IGLJ2 (Fragment) |  | 1 | 1.05 | 0.89 |
| A0A5C2GLJ1 | IG c807_light_IGKV3-15_IGKJ4 (Fragment) |  | 1 | 0.76 | 0.13 |
| A0A5C2GLK7 | IG c58_heavy_IGHV3-23_IGHD5-18_IGHJ4 (Fragment) |  | 5 | 0.58 | 0.18 |
| A0A5C2GLL4 | IG c226_heavy_IGHV3-23_IGHD5-24_IGHJ4 (Fragment) |  | 2 | 0.95 | 0.88 |
| A0A5C2GLM0 | IG c402_heavy_IGHV3-21_IGHD3-10_IGHJ6 (Fragment) |  | 3 | 0.49 | 0.40 |
| A0A5C2GLP0 | IG c606_light_IGKV3-20_IGKJ4 (Fragment) |  | 2 | 4.65 | 0.41 |
| A0A5C2GLP6 | IG c465_heavy_IGHV3-49_IGHD3-22_IGHJ5 (Fragment) |  | 1 | 2.26 | 0.14 |
| A0A5C2GLU3 | IG c148_heavy_IGHV3-7_IGHD3-3_IGHJ6 (Fragment) |  | 1 | 0.49 | 0.30 |
| A0A5C2GLU4 | IG c316_heavy_IGHV3-7_IGHD5-18_IGHJ4 (Fragment) |  | 1 | 0.72 | 0.44 |
| A0A5C2GLW1 | IG c336_heavy_IGHV3-72_IGHD7-27_IGHJ3 (Fragment) |  | 5 | 2.27 | 0.36 |
| A0A5C2GLW6 | IG c505_heavy_IGHV4-34_IGHD1-26_IGHJ6 (Fragment) |  | 2 | 0.63 | 0.51 |
| A0A5C2GLX2 | IG c107_light_IGLV2-11_IGLJ1 (Fragment) |  | 1 | 0.62 | 0.47 |
| A0A5C2GLY3 | IG c366_heavy_IGHV3-7_IGHD1-26_IGHJ4 (Fragment) |  | 4 | 0.47 | 0.32 |
| A0A5C2GLZ3 | IG c1022_heavy_IGHV1-2_IGHD3-16_IGHJ6 (Fragment) |  | 1 | 1.11 | 0.78 |
| A0A5C2GM19 | IG c228_heavy_IGHV3-48_IGHD1-7_IGHJ3 (Fragment) |  | 1 | 0.79 | 0.62 |
| A0A5C2GM37 | IG c1221_light_IGKV3-20_IGKJ2 (Fragment) |  | 5 | 0.80 | 0.55 |
| A0A5C2GM54 | IG c595_heavy_IGHV5-51_IGHD2-2_IGHJ4 (Fragment) |  | 9 | 0.84 | 0.76 |
| A0A5C2GM64 | IG c692_light_IGKV4-1_IGKJ1 (Fragment) |  | 3 | 1.32 | 0.45 |
| A0A5C2GM65 | IG c231_light_IGLV1-47_IGLJ2 (Fragment) |  | 3 | 0.66 | 0.51 |
| A0A5C2GMA0 | IG c1322_light_IGKV1D-39_IGKJ1 (Fragment) |  | 2 | 2.66 | 0.08 |
| A0A5C2GMA1 | IG c1071_light_IGKV1-5_IGKJ2 (Fragment) |  | 1 | 0.69 | 0.29 |
| A0A5C2GMA5 | IG c582_heavy_IGHV3-74_IGHD3-16_IGHJ5 (Fragment) |  | 4 | 0.77 | 0.49 |
| A0A5C2GMC2 | IG c610_light_IGKV3-20_IGKJ3 (Fragment) |  | 1 | 0.81 | 0.55 |
| A0A5C2GMD1 | IG c848_light_IGKV1-5_IGKJ4 (Fragment) |  | 1 | 0.93 | 0.80 |
| A0A5C2GMD4 | IG c3_heavy_IGHV3-48_IGHD3-16_IGHJ4 (Fragment) |  | 6 | 1.15 | 0.51 |
| A0A5C2GME8 | IG c526_heavy_IGHV3-49_IGHD3-10_IGHJ4 (Fragment) |  | 1 | 1.17 | 0.61 |
| A0A5C2GMF1 | IG c300_light_IGLV1-47_IGLJ3 (Fragment) |  | 2 | 2.04 | 0.19 |
| A0A5C2GMF3 | IG c607_heavy_IGHV3-11_IGHD1-7_IGHJ4 (Fragment) |  | 1 | 0.67 | 0.60 |
| A0A5C2GMH8 | IG c377_light_IGKV4-1_IGKJ4 (Fragment) |  | 1 | 1.19 | 0.55 |
| A0A5C2GMI6 | IG c566_heavy_IGHV4-34_IGHD2-2_IGHJ5 (Fragment) |  | 3 | 1.50 | 0.35 |
| A0A5C2GMI7 | IG c992_light_IGKV4-1_IGKJ4 (Fragment) |  | 1 | 0.51 | 0.32 |
| A0A5C2GML0 | IG c775_heavy_IGHV3-15_IGHD3-10_IGHJ4 (Fragment) |  | 4 | 0.53 | 0.32 |
| A0A5C2GML1 | IG c428_heavy_IGHV3-72_IGHD3-3_IGHJ6 (Fragment) |  | 2 | 0.58 | 0.41 |
| A0A5C2GMS9 | IG c1318_light_IGKV3-20_IGKJ2 (Fragment) |  | 1 | 1.24 | 0.71 |
| A0A5C2GMU4 | IG c898_light_IGLV6-57_IGLJ3 (Fragment) |  | 2 | 0.35 | 0.22 |
| A0A5C2GN05 | IG c987_light_IGKV4-1_IGKJ5 (Fragment) |  | 1 | 1.19 | 0.47 |
| A0A5C2GN16 | IG c568_heavy_IGHV4-59B_IGHD6-13_IGHJ4 (Fragment) |  | 2 | 0.50 | 0.54 |
| A0A5C2GN22 | IG c180_light_IGKV3-20_IGKJ3 (Fragment) |  | 2 | 1.38 | 0.51 |
| A0A5C2GN52 | IG c882_heavy_IGHV3-49_IGHD3-3_IGHJ6 (Fragment) |  | 1 | 1.22 | 0.84 |
| A0A5C2GN85 | IG c1200_light_IGKV2D-28_IGKJ5 (Fragment) |  | 1 | 0.70 | 0.63 |
| A0A5C2GNA4 | IG c362_light_IGKV1-5_IGKJ1 (Fragment) |  | 7 | 0.86 | 0.71 |
| A0A5C2GNA6 | IG c658_heavy_IGHV3-53_IGHD5-24_IGHJ4 (Fragment) |  | 1 | 0.73 | 0.47 |
| A0A5C2GNB0 | IG c1181_heavy_IGHV3-30_IGHD3-10_IGHJ6 (Fragment) |  | 2 | 0.79 | 0.58 |
| A0A5C2GNC4 | IG c742_light_IGKV1-5_IGKJ1 (Fragment) |  | 3 | 0.83 | 0.68 |
| A0A5C2GNF9 | IG c90_light_IGKV3-11_IGKJ5 (Fragment) |  | 3 | 0.40 | 0.19 |
| A0A5C2GNH2 | IG c876_heavy_IGHV4-34_IGHD2-2_IGHJ4 (Fragment) |  | 1 | 1.67 | 0.64 |
| A0A5C2GNI0 | IG c886_heavy_IGHV4-4_IGHD1-7_IGHJ6 (Fragment) |  | 1 | 4.59 | 0.49 |
| A0A5C2GNL8 | IG c1073_heavy_IGHV3-23_IGHD6-19_IGHJ4 (Fragment) |  | 3 | 1.81 | 0.32 |
| A0A5C2GNM0 | IG c1009_light_IGLV4-69_IGLJ2 (Fragment) |  | 4 | 10.56 | 0.16 |
| A0A5C2GNN4 | IG c150_heavy_IGHV3-48_IGHD1-26_IGHJ3 (Fragment) |  | 2 | 0.66 | 0.48 |
| A0A5C2GNP9 | IG c521_heavy_IGHV3-48_IGHD3-22_IGHJ3 (Fragment) |  | 2 | 0.59 | 0.28 |
| A0A5C2GNS1 | IG c463_heavy_IGHV3-49_IGHD3-10_IGHJ5 (Fragment) |  | 1 | 1.54 | 0.13 |
| A0A5C2GNT5 | IG c10_light_IGKV3-11_IGKJ1 (Fragment) |  | 3 | 1.17 | 0.56 |
| A0A5C2GNU3 | IG c227_heavy_IGHV3-53_IGHD3-10_IGHJ4 (Fragment) |  | 5 | 2.19 | 0.37 |
| A0A5C2GNW3 | IG c240_heavy_IGHV3-11_IGHD3-16_IGHJ5 (Fragment) |  | 2 | 1.59 | 0.35 |
| A0A5C2GNX4 | IG c870_heavy_IGHV3-66_IGHD3-16_IGHJ1 (Fragment) |  | 2 | 1.65 | 0.30 |
| A0A5C2GNY9 | IG c270_heavy_IGHV3-7_IGHD3-10_IGHJ3 (Fragment) |  | 1 | 0.54 | 0.15 |
| A0A5C2GNZ7 | IG c280_heavy_IGHV3-23_IGHD2-21_IGHJ2 (Fragment) |  | 1 | 0.49 | 0.08 |
| A0A5C2GP05 | IG c958_heavy_IGHV4-31_IGHD3-3_IGHJ4 (Fragment) |  | 2 | 1.69 | 0.30 |
| A0A5C2GP13 | IG c38_heavy_IGHV3-74_IGHD2-15_IGHJ4 (Fragment) |  | 2 | 1.94 | 0.17 |
| A0A5C2GP29 | IG c1293_heavy_IGHV3-74_IGHD5-18_IGHJ6 (Fragment) |  | 3 | 1.40 | 0.14 |
| A0A5C2GP31 | IG c583_heavy_IGHV3-23_IGHD3-10_IGHJ4 (Fragment) |  | 1 | 0.64 | 0.16 |
| A0A5C2GP32 | IG c434_heavy_IGHV3-48_IGHD2-15_IGHJ5 (Fragment) |  | 3 | 0.80 | 0.60 |
| A0A5C2GP67 | IG c633_heavy_IGHV3-21_IGHD6-19_IGHJ6 (Fragment) |  | 1 | 0.57 | 0.32 |
| A0A5C2GPA3 | IG c650_heavy_IGHV4-34_IGHD6-13_IGHJ4 (Fragment) |  | 1 | 1.19 | 0.68 |
| A0A5C2GPA8 | IG c673_heavy_IGHV3-33_IGHD2-8_IGHJ4 (Fragment) |  | 4 | 0.64 | 0.27 |
| A0A5C2GPB7 | IG c534_heavy_IGHV3-53_IGHD3-3_IGHJ4 (Fragment) |  | 2 | 0.84 | 0.28 |
| A0A5C2GPB9 | IG c1156_light_IGLV6-57_IGLJ2 (Fragment) |  | 7 | 1.11 | 0.80 |
| A0A5C2GPC0 | IG c1235_heavy_IGHV3-74_IGHD2-8_IGHJ6 (Fragment) |  | 2 | 1.21 | 0.68 |
| A0A5C2GPD5 | IG c430_heavy_IGHV3-23_IGHD4-17_IGHJ2 (Fragment) |  | 1 | 0.73 | 0.30 |
| A0A5C2GPG2 | IG c733_heavy_IGHV3-7_IGHD3-9_IGHJ5 (Fragment) |  | 1 | 0.78 | 0.47 |
| A0A5C2GPH1 | IG c584_heavy_IGHV1-18_IGHD3-10_IGHJ4 (Fragment) |  | 2 | 0.77 | 0.30 |
| A0A5C2GPK3 | IG c1040_light_IGKV1-6_IGKJ1 (Fragment) |  | 13 | 1.73 | 0.35 |
| A0A5C2GPL7 | IG c1326_heavy_IGHV3-49_IGHD2-15_IGHJ4 (Fragment) |  | 3 | 0.73 | 0.58 |
| A0A5C2GPN1 | IG c1355_heavy_IGHV4-4_IGHD2-2_IGHJ1 (Fragment) |  | 2 | 0.94 | 0.88 |
| A0A5C2GPQ1 | IG c843_heavy_IGHV3-49_IGHD3-3_IGHJ6 (Fragment) |  | 2 | 0.57 | 0.33 |
| A0A5C2GPS6 | IG c873_heavy_IGHV3-23_IGHD5-24_IGHJ4 (Fragment) |  | 2 | 0.66 | 0.61 |
| A0A5C2GPW1 | IG c620_heavy_IGHV3-30_IGHD3-22_IGHJ4 (Fragment) |  | 1 | 1.09 | 0.86 |
| A0A5C2GPX1 | IG c754_heavy_IGHV3-23_IGHD1-26_IGHJ4 (Fragment) |  | 1 | 0.61 | 0.26 |
| A0A5C2GQ05 | IG c1476_heavy_IGHV3-7_IGHD4-11_IGHJ4 (Fragment) |  | 6 | 0.94 | 0.91 |
| A0A5C2GQ34 | IG c49_heavy_IGHV3-9_IGHD3-22_IGHJ1 (Fragment) |  | 4 | 1.10 | 0.56 |
| A0A5C2GQ55 | IG c1526_heavy_IGHV3-7_IGHD3-3_IGHJ4 (Fragment) |  | 4 | 1.14 | 0.67 |
| A0A5C2GQB1 | IG c1522_heavy_IGHV3-53_IGHD2-21_IGHJ4 (Fragment) |  | 2 | 0.23 | 0.29 |
| A0A5C2GQC4 | IG c1161_heavy_IGHV5-51_IGHD3-3_IGHJ4 (Fragment) |  | 2 | 1.01 | 0.98 |
| A0A5C2GQJ2 | IG c1328_light_IGLV2-14_IGLJ2 (Fragment) |  | 1 | 0.88 | 0.73 |
| A0A5C2GQJ7 | IG c1173_heavy_IGHV3-23_IGHD3-3_IGHJ6 (Fragment) |  | 3 | 0.50 | 0.19 |
| A0A5C2GQR5 | IG c1672_heavy_IGHV4-4_IGHD6-6_IGHJ2 (Fragment) |  | 1 | 1.90 | 0.14 |
| A0A5C2GQV6 | IG c920_heavy_IGHV3-74_IGHD7-27_IGHJ2 (Fragment) |  | 4 | 0.82 | 0.50 |
| A0A5C2GQX0 | IG c1608_heavy_IGHV3-33_IGHD3-9_IGHJ4 (Fragment) |  | 2 | 0.21 | 0.10 |
| A0A5C2GQY8 | IG c1752_heavy_IGHV3-23_IGHD3-10_IGHJ4 (Fragment) |  | 2 | 0.09 | 0.32 |
| A0A5C2GR18 | IG c1782_heavy_IGHV1-46_IGHD1-7_IGHJ3 (Fragment) |  | 2 | 1.36 | 0.27 |
| A0A5C2GR19 | IG c1836_heavy_IGHV4-59_IGHD3-9_IGHJ4 (Fragment) |  | 1 | 2.23 | 0.07 |
| A0A5C2GR38 | IG c1184_heavy_IGHV3-66_IGHD3-22_IGHJ3 (Fragment) |  | 3 | 0.72 | 0.25 |
| A0A5C2GR43 | IG c1000_heavy_IGHV3-33_IGHD1-20_IGHJ4 (Fragment) |  | 1 | 0.89 | 0.70 |
| A0A5C2GR58 | IG c1383_heavy_IGHV3-7_IGHD3-22_IGHJ5 (Fragment) |  | 4 | 0.23 | 0.11 |
| A0A5C2GR64 | IG c1403_heavy_IGHV3-15_IGHD3-16_IGHJ4 (Fragment) |  | 1 | 1.66 | 0.19 |
| A0A5C2GR94 | IG c4_light_IGKV3-20_IGKJ3 (Fragment) |  | 2 | 1.55 | 0.60 |
| A0A5C2GRB6 | IG c429_heavy_IGHV1-46_IGHD4-17_IGHJ1 (Fragment) |  | 1 | 1.06 | 0.75 |
| A0A5C2GRD1 | IG c1274_heavy_IGHV3-33_IGHD6-19_IGHJ4 (Fragment) |  | 1 | 0.99 | 0.92 |
| A0A5C2GRF6 | IG c1110_heavy_IGHV5-51_IGHD6-6_IGHJ4 (Fragment) |  | 2 | 0.96 | 0.91 |
| A0A5C2GRG5 | IG c376_light_IGLV3-21_IGLJ2 (Fragment) |  | 1 | 1.61 | 0.30 |
| A0A5C2GRH5 | IG c622_light_IGKV2D-29_IGKJ4 (Fragment) |  | 2 | 0.45 | 0.48 |
| A0A5C2GRN5 | IG c71_light_IGKV1D-13_IGKJ3 (Fragment) |  | 2 | 1.61 | 0.06 |
| A0A5C2GRN8 | IG c1374_heavy_IGHV3-48_IGHD5-12_IGHJ4 (Fragment) |  | 3 | 0.72 | 0.44 |
| A0A5C2GRP9 | IG c1563_heavy_IGHV3-73_IGHD2-15_IGHJ4 (Fragment) |  | 3 | 2.70 | 0.35 |
| A0A5C2GRQ1 | IG c559_heavy_IGHV3-53_IGHD3-9_IGHJ2 (Fragment) |  | 1 | 0.04 | 0.06 |
| A0A5C2GRQ2 | IG c500_light_IGKV1-5_IGKJ2 (Fragment) |  | 1 | 0.91 | 0.65 |
| A0A5C2GRQ8 | IG c1210_heavy_IGHV3-33_IGHD1-7_IGHJ6 (Fragment) |  | 1 | 0.59 | 0.09 |
| A0A5C2GRS5 | IG c165_light_IGKV1D-33_IGKJ4 (Fragment) |  | 1 | 2.80 | 0.20 |
| A0A5C2GRU1 | IG c224_light_IGKV4-1_IGKJ1 (Fragment) |  | 2 | 0.80 | 0.67 |
| A0A5C2GRW6 | IG c264_light_IGLV3-21_IGLJ1 (Fragment) |  | 1 | 0.93 | 0.89 |
| A0A5C2GRY5 | IG c284_light_IGKV3-20_IGKJ1 (Fragment) |  | 1 | 1.51 | 0.24 |
| A0A5C2GRZ5 | IG c294_light_IGKV1-12_IGKJ5 (Fragment) |  | 1 | 2.10 | 0.35 |
| A0A5C2GRZ8 | IG c1260_heavy_IGHV2-26_IGHD3-3_IGHJ3 (Fragment) |  | 2 | 1.13 | 0.70 |
| A0A5C2GS20 | IG c171_light_IGKV2D-29_IGKJ3 (Fragment) |  | 1 | 0.91 | 0.59 |
| A0A5C2GS31 | IG c107_light_IGLV9-49_IGLJ3 (Fragment) |  | 2 | 11.45 | 0.41 |
| A0A5C2GS46 | IG c1300_heavy_IGHV3-15_IGHD3-3_IGHJ6 (Fragment) |  | 1 | 0.70 | 0.30 |
| A0A5C2GSB5 | IG c551_heavy_IGHV3-7_IGHD3-10_IGHJ6 (Fragment) |  | 2 | 1.10 | 0.78 |
| A0A5C2GSD7 | IG c291_light_IGLV1-40_IGLJ2 (Fragment) |  | 2 | 0.54 | 0.48 |
| A0A5C2GSD9 | IG c227_light_IGLV3-25_IGLJ3 (Fragment) |  | 7 | 0.80 | 0.60 |
| A0A5C2GSG9 | IG c341_light_IGLV6-57_IGLJ3 (Fragment) |  | 2 | 0.65 | 0.57 |
| A0A5C2GSJ8 | IG c1664_heavy_IGHV5-51_IGHD5-5_IGHJ6 (Fragment) |  | 1 | 0.64 | 0.46 |
| A0A5C2GSJ9 | IG c769_heavy_IGHV3-23_IGHD6-19_IGHJ3 (Fragment) |  | 3 | 0.56 | 0.31 |
| A0A5C2GSP8 | IG c1510_heavy_IGHV3-7_IGHD5-12_IGHJ4 (Fragment) |  | 3 | 0.18 | 0.39 |
| A0A5C2GSQ5 | IG c829_heavy_IGHV3-9_IGHD6-13_IGHJ4 (Fragment) |  | 3 | 0.18 | 0.12 |
| A0A5C2GST6 | IG c1754_heavy_IGHV5-51_IGHD3-3_IGHJ6 (Fragment) |  | 1 | 1.06 | 0.91 |
| A0A5C2GSZ9 | IG c939_heavy_IGHV3-21_IGHD7-27_IGHJ3 (Fragment) |  | 3 | 1.48 | 0.56 |
| A0A5C2GT12 | IG c1844_heavy_IGHV3-23_IGHD3-22_IGHJ2 (Fragment) |  | 4 | 0.97 | 0.93 |
| A0A5C2GT15 | IG c681_heavy_IGHV3-21_IGHD3-9_IGHJ4 (Fragment) |  | 4 | 1.04 | 0.94 |
| A0A5C2GT38 | IG c989_heavy_IGHV3-13_IGHD6-6_IGHJ2 (Fragment) |  | 1 | 1.03 | 0.95 |
| A0A5C2GT62 | IG c1690_heavy_IGHV3-21_IGHD5-18_IGHJ6 (Fragment) |  | 3 | 0.94 | 0.86 |
| A0A5C2GT92 | IG c1884_heavy_IGHV3-23_IGHD3-10_IGHJ4 (Fragment) |  | 2 | 0.52 | 0.38 |
| A0A5C2GTE2 | IG c617_light_IGKV3-15_IGKJ5 (Fragment) |  | 1 | 1.32 | 0.41 |
| A0A5C2GTE6 | IG c711_light_IGLV3-21_IGLJ3 (Fragment) |  | 1 | 1.55 | 0.45 |
| A0A5C2GTE8 | IG c791_heavy_IGHV3-9_IGHD3-10_IGHJ3 (Fragment) |  | 5 | 0.78 | 0.59 |
| A0A5C2GTG7 | IG c1800_heavy_IGHV3-23_IGHD1-26_IGHJ3 (Fragment) |  | 3 | 0.51 | 0.23 |
| A0A5C2GTK2 | IG c322_light_IGKV3-20_IGKJ5 (Fragment) |  | 2 | 0.70 | 0.48 |
| A0A5C2GTL3 | IG c1056_light_IGKV3-20_IGKJ1 (Fragment) |  | 1 | 0.62 | 0.31 |
| A0A5C2GTP5 | IG c1229_heavy_IGHV3-21_IGHD6-19_IGHJ6 (Fragment) |  | 2 | 0.84 | 0.68 |
| A0A5C2GTR0 | IG c143_light_IGLV1-40_IGLJ3 (Fragment) |  | 1 | 1.30 | 0.42 |
| A0A5C2GTT5 | IG c911_heavy_IGHV3-23_IGHD1-7_IGHJ3 (Fragment) |  | 1 | 0.93 | 0.75 |
| A0A5C2GTT7 | IG c925_light_IGKV4-1_IGKJ2 (Fragment) |  | 7 | 0.78 | 0.36 |
| A0A5C2GTW0 | IG c944_light_IGLV1-47_IGLJ1 (Fragment) |  | 1 | 4.11 | 0.43 |
| A0A5C2GTW8 | IG c1319_heavy_IGHV3-11_IGHD1-14_IGHJ4 (Fragment) |  | 1 | 0.62 | 0.36 |
| A0A5C2GU42 | IG c1025_light_IGKV1-8_IGKJ2 (Fragment) |  | 1 | 1.36 | 0.52 |
| A0A5C2GU68 | IG c1064_light_IGKV3-15_IGKJ2 (Fragment) |  | 2 | 1.21 | 0.24 |
| A0A5C2GU73 | IG c857_light_IGLV3-21_IGLJ2 (Fragment) |  | 4 | 0.66 | 0.34 |
| A0A5C2GU90 | IG c67_heavy_IGHV3-74_IGHD1-14_IGHJ3 (Fragment) |  | 1 | 1.27 | 0.40 |
| A0A5C2GUB1 | IG c897_light_IGKV4-1_IGKJ2 (Fragment) |  | 2 | 1.03 | 0.94 |
| A0A5C2GUD6 | IG c1134_light_IGKV3-15_IGKJ1 (Fragment) |  | 1 | 1.92 | 0.30 |
| A0A5C2GUL4 | IG c1215_light_IGKV3-15_IGKJ2 (Fragment) |  | 3 | 1.09 | 0.62 |
| A0A5C2GUS4 | IG c1284_light_IGKV4-1_IGKJ5 (Fragment) |  | 3 | 0.73 | 0.14 |
| A0A5C2GUT4 | IG c1191_light_IGKV1-33_IGKJ2 (Fragment) |  | 1 | 0.53 | 0.28 |
| A0A5C2GUV3 | IG c1589_heavy_IGHV3-48_IGHD2-2_IGHJ4 (Fragment) |  | 1 | 0.80 | 0.61 |
| A0A5C2GUV5 | IG c297_heavy_IGHV3-33_IGHD3-16_IGHJ6 (Fragment) |  | 2 | 0.59 | 0.58 |
| A0A5C2GUW7 | IG c1117_light_IGLV3-21_IGLJ3 (Fragment) |  | 2 | 0.62 | 0.63 |
| A0A5C2GUX6 | IG c389_light_IGKV3-11_IGKJ1 (Fragment) |  | 3 | 0.36 | 0.34 |
| A0A5C2GUY4 | IG c1345_light_IGKV1-5_IGKJ1 (Fragment) |  | 3 | 0.51 | 0.13 |
| A0A5C2GV14 | IG c1384_light_IGKV3-11_IGKJ4 (Fragment) |  | 5 | 0.91 | 0.77 |
| A0A5C2GV75 | IG c1361_heavy_IGHV3-7_IGHD3-3_IGHJ4 (Fragment) |  | 2 | 0.59 | 0.60 |
| A0A5C2GV93 | IG c1485_light_IGLV3-25_IGLJ2 (Fragment) |  | 2 | 0.78 | 0.34 |
| A0A5C2GV99 | IG c1391_heavy_IGHV1-2_IGHD3-3_IGHJ4 (Fragment) |  | 2 | 1.01 | 0.98 |
| A0A5C2GVA0 | IG c1247_light_IGKV1D-13_IGKJ4 (Fragment) |  | 1 | 0.74 | 0.40 |
| A0A5C2GVA7 | IG c792_light_IGKV1-5_IGKJ2 (Fragment) |  | 1 | 0.99 | 0.99 |
| A0A5C2GVB5 | IG c487_heavy_IGHV3-48_IGHD4-4_IGHJ6 (Fragment) |  | 3 | 0.84 | 0.74 |
| A0A5C2GVE2 | IG c1534_light_IGKV3-20_IGKJ2 (Fragment) |  | 4 | 1.12 | 0.52 |
| A0A5C2GVE5 | IG c517_heavy_IGHV1-8_IGHD3-16_IGHJ5 (Fragment) |  | 1 | 1.13 | 0.53 |
| A0A5C2GVE6 | IG c1441_heavy_IGHV3-33_IGHD1-20_IGHJ4 (Fragment) |  | 1 | 0.72 | 0.52 |
| A0A5C2GVJ2 | IG c1491_heavy_IGHV3-21_IGHD3-3_IGHJ4 (Fragment) |  | 1 | 1.08 | 0.81 |
| A0A5C2GVM3 | IG c846_light_IGKV3-20_IGKJ4 (Fragment) |  | 2 | 1.39 | 0.18 |
| A0A5C2GVN7 | IG c1635_light_IGLV4-69_IGLJ2 (Fragment) |  | 2 | 0.47 | 0.42 |
| A0A5C2GVP0 | IG c1551_heavy_IGHV3-48_IGHD1-1_IGHJ5 (Fragment) |  | 3 | 0.30 | 0.21 |
| A0A5C2GVP3 | IG c617_heavy_IGHV3-7_IGHD6-19_IGHJ3 (Fragment) |  | 2 | 0.41 | 0.32 |
| A0A5C2GVT0 | IG c1601_heavy_IGHV3-74_IGHD1-7_IGHJ2 (Fragment) |  | 2 | 1.36 | 0.55 |
| A0A5C2GVT8 | IG c1695_light_IGLV1-47_IGLJ2 (Fragment) |  | 4 | 0.64 | 0.60 |
| A0A5C2GVU0 | IG c552_heavy_IGHV3-7_IGHD4-23_IGHJ4 (Fragment) |  | 2 | 0.52 | 0.45 |
| A0A5C2GVU8 | IG c677_heavy_IGHV5-51_IGHD3-22_IGHJ4 (Fragment) |  | 2 | 0.90 | 0.80 |
| A0A5C2GVX4 | IG c1735_light_IGKV3-20_IGKJ2 (Fragment) |  | 1 | 1.58 | 0.24 |
| A0A5C2GW00 | IG c1033_light_IGKV4-1_IGKJ2 (Fragment) |  | 2 | 0.94 | 0.87 |
| A0A5C2GW09 | IG c1641_light_IGKV1-6_IGKJ4 (Fragment) |  | 2 | 2.10 | 0.13 |
| A0A5C2GW95 | IG c1845_light_IGLV1-47_IGLJ3 (Fragment) |  | 2 | 0.79 | 0.49 |
| A0A5C2GW97 | IG c1112_light_IGKV1-5_IGKJ1 (Fragment) |  | 1 | 1.08 | 0.65 |
| A0A5C2GWC4 | IG c1213_light_IGKV3-20_IGKJ2 (Fragment) |  | 2 | 0.15 | 0.25 |
| A0A5C2GWD6 | IG c1173_light_IGKV1-27_IGKJ1 (Fragment) |  | 2 | 1.41 | 0.20 |
| A0A5C2GWF1 | IG c887_heavy_IGHV4-34_IGHD4-17_IGHJ4 (Fragment) |  | 1 | 0.56 | 0.07 |
| A0A5C2GWG0 | IG c1473_light_IGKV4-1_IGKJ3 (Fragment) |  | 1 | 0.81 | 0.69 |
| A0A5C2GWG5 | IG c1884_light_IGKV1-9_IGKJ5 (Fragment) |  | 2 | 0.76 | 0.41 |
| A0A5C2GWH0 | IG c907_heavy_IGHV3-9_IGHD6-19_IGHJ4 (Fragment) |  | 2 | 0.64 | 0.39 |
| A0A5C2GWN2 | IG c1232_light_IGKV4-1_IGKJ1 (Fragment) |  | 5 | 0.66 | 0.44 |
| A0A5C2GWQ8 | IG c1657_light_IGLV1-51_IGLJ2 (Fragment) |  | 1 | 0.87 | 0.53 |
| A0A5C2GWT5 | IG c1403_light_IGKV4-1_IGKJ2 (Fragment) |  | 1 | 0.85 | 0.80 |
| A0A5C2GWU4 | IG c1292_light_IGKV1-12_IGKJ3 (Fragment) |  | 3 | 0.96 | 0.92 |
| A0A5C2GX34 | IG c240_light_IGLV2-14_IGLJ2 (Fragment) |  | 4 | 1.12 | 0.79 |
| A0A5C2GX61 | IG c1402_light_IGKV3-11_IGKJ5 (Fragment) |  | 1 | 0.76 | 0.43 |
| A0A5C2GX83 | IG c1039_light_IGKV4-1_IGKJ2 (Fragment) |  | 3 | 1.18 | 0.60 |
| A0A5C2GXA1 | IG c1583_light_IGKV2D-28_IGKJ2 (Fragment) |  | 4 | 0.73 | 0.28 |
| A0A5C2GXC2 | IG c1247_heavy_IGHV1-69_IGHD1-1_IGHJ6 (Fragment) |  | 5 | 0.93 | 0.84 |
| A0A5C2GXS3 | IG c510_light_IGKV3-11_IGKJ5 (Fragment) |  | 1 | 1.29 | 0.56 |
| A0A5C2GXV5 | IG c1447_heavy_IGHV3-15_IGHD3-3_IGHJ5 (Fragment) |  | 2 | 0.61 | 0.57 |
| A0A5C2GXV9 | IG c478_light_IGKV1D-13_IGKJ4 (Fragment) |  | 2 | 1.52 | 0.64 |
| A0A5C2GXY4 | IG c1612_light_IGLV1-47_IGLJ2 (Fragment) |  | 1 | 0.96 | 0.93 |
| A0A5C2GY12 | IG c538_light_IGLV6-57_IGLJ3 (Fragment) |  | 3 | 0.68 | 0.59 |
| A0A5C2GY47 | IG c1537_heavy_IGHV3-48_IGHD1-26_IGHJ4 (Fragment) |  | 3 | 1.28 | 0.73 |
| A0A5C2GY48 | IG c1672_light_IGLV3-1_IGLJ2 (Fragment) |  | 3 | 0.31 | 0.30 |
| A0A5C2GYC3 | IG c1742_light_IGKV1-5_IGKJ2 (Fragment) |  | 1 | 0.55 | 0.42 |
| A0A5C2GYE9 | IG c1409_light_IGKV3-20_IGKJ2 (Fragment) |  | 2 | 1.02 | 0.92 |
| A0A5C2GYH7 | IG c698_light_IGKV1-5_IGKJ1 (Fragment) |  | 2 | 0.68 | 0.64 |
| A0A5C2GYL4 | IG c830_light_IGKV1-12_IGKJ5 (Fragment) |  | 3 | 0.77 | 0.47 |
| A0A5C2GYW0 | IG c930_light_IGKV2D-29_IGKJ1 (Fragment) |  | 6 | 7.51 | 0.38 |
| A0A5C2GYX1 | IG c1579_light_IGKV1-5_IGKJ1 (Fragment) |  | 2 | 1.64 | 0.62 |
| A0A5C2GYX6 | IG c950_light_IGKV3-20_IGKJ2 (Fragment) |  | 3 | 0.17 | 0.28 |
| A0A5C2GYX9 | IG c1847_heavy_IGHV3-13_IGHD3-3_IGHJ3 (Fragment) |  | 1 | 0.69 | 0.34 |
| A0A5C2GZ09 | IG c990_light_IGKV3D-20_IGKJ4 (Fragment) |  | 2 | 0.76 | 0.58 |
| A0A5C2GZU5 | IG c1300_light_IGKV1-12_IGKJ1 (Fragment) |  | 2 | 0.78 | 0.36 |
| A0A5C2H0S8 | IG c1548_light_IGKV1-9_IGKJ4 (Fragment) |  | 2 | 0.49 | 0.39 |
| A0A5C2H108 | IG c1743_light_IGLV6-57_IGLJ3 (Fragment) |  | 6 | 0.80 | 0.55 |
| A0A5C2H1E9 | IG c726_light_IGKV1-27_IGKJ1 (Fragment) |  | 1 | 1.28 | 0.36 |
| A0A5C2H1J2 | IG c1788_light_IGKV3-20_IGKJ1 (Fragment) |  | 6 | 0.97 | 0.94 |
| A0A5C2H1L6 | IG c360_light_IGLV1-40_IGLJ2 (Fragment) |  | 3 | 0.45 | 0.23 |
| A0A5C2H1S8 | IG c886_light_IGLV3-25_IGLJ3 (Fragment) |  | 3 | 0.84 | 0.60 |
| A0A5C2H271 | IG c1046_light_IGKV1-5_IGKJ3 (Fragment) |  | 1 | 1.21 | 0.34 |
| A0A5C2H2K5 | IG c1206_light_IGKV3-15_IGKJ4 (Fragment) |  | 2 | 0.84 | 0.82 |
| A0A5C2H2W5 | IG c1326_light_IGKV1-5_IGKJ1 (Fragment) |  | 1 | 0.71 | 0.22 |
| A0A5C2H3A1 | IG c1476_light_IGLV2-8_IGLJ1 (Fragment) |  | 1 | 0.82 | 0.61 |
| A0A5C2H3L0 | IG c1606_light_IGKV4-1_IGKJ2 (Fragment) |  | 4 | 1.36 | 0.37 |
| A0A5H1ZRQ7 | Immunoglobulin lambda constant 7 (Fragment) | IGLC7 | 5 | 0.57 | 0.32 |
| A0A650F0N3 | Beta-globin (Fragment) |  | 1 | 0.95 | 0.88 |
| A0N071 | Delta globin | HBD | 5 | 0.55 | 0.39 |
| A0N5G1 | Rheumatoid factor C6 light chain (Fragment) | V-kappa-1 | 3 | 0.92 | 0.88 |
| A0N7I9 | F5-20 (Fragment) | F5-20 | 2 | 1.97 | 0.38 |
| A2IPH7 | HRV Fab 025-VH (Fragment) |  | 1 | 0.47 | 0.29 |
| A2J1N0 | Rheumatoid factor RF-IP14 (Fragment) |  | 1 | 1.83 | 0.07 |
| A2J1N5 | Rheumatoid factor RF-ET6 (Fragment) |  | 4 | 0.75 | 0.46 |
| A2J1N6 | Rheumatoid factor RF-ET9 (Fragment) |  | 5 | 0.69 | 0.14 |
| A2J1N7 | Rheumatoid factor RF-ET10 (Fragment) |  | 1 | 0.75 | 0.43 |
| A2JA18 | Anti-mucin1 heavy chain variable region (Fragment) |  | 2 | 0.40 | 0.40 |
| A2N2F4 | VK3 protein (Fragment) | VK3 | 2 | 0.93 | 0.91 |
| A2N7P4 | Immunoglobulin mu-chain D-J4-region (Fragment) | IGHM | 4 | 0.74 | 0.27 |
| A2NKM6 | NANUC-1 heavy chain (Fragment) |  | 2 | 1.01 | 0.98 |
| A2NYU9 | Heavy chain Fab (Fragment) |  | 3 | 0.59 | 0.23 |
| A2RTY6 | Inter-alpha (Globulin) inhibitor H2, isoform CRA_b | ITIH2 | 80 | 0.81 | 0.16 |
| A2VCK8 | Thymosin beta 4, X-linked | TMSB4X | 3 | 0.41 | 0.20 |
| A3KPE2 | Apolipoprotein C-III, isoform CRA_a | APOC3 | 10 | 0.71 | 0.07 |
| A5PL27 | CP protein | CP | 128 | 0.69 | 0.34 |
| A5PL32 | APOL1 protein (Fragment) | APOL1 | 5 | 0.64 | 0.43 |
| A6XGL1 | Transthyretin |  | 30 | 0.64 | 0.41 |
| A6XND0 | Insulin-like growth factor-binding protein 3 | IGFBP3 | 8 | 0.97 | 0.89 |
| A6XND9 | Beta-2-microglobulin |  | 7 | 1.97 | 0.06 |
| A6XNE2 | Complement factor D preproprotein |  | 7 | 1.41 | 0.35 |
| A8K1K1 | cDNA FLJ76342, highly similar to Homo sapiens carnosine dipeptidase 1 (metallopeptidase M20 family)(CNDP1), mRNA |  | 15 | 0.90 | 0.69 |
| A8K486 | Peptidyl-prolyl cis-trans isomerase |  | 2 | 0.53 | 0.45 |
| A8K5T0 | cDNA FLJ75416, highly similar to Homo sapiens complement factor H (CFH), mRNA |  | 2 | 0.66 | 0.46 |
| A8K669 | cDNA FLJ78452, highly similar to Homo sapiens legumain (LGMN), transcript variant 2, mRNA |  | 1 | 1.65 | 0.26 |
| A8K6Q8 | cDNA FLJ75881, highly similar to Homo sapiens transferrin receptor (p90, CD71) (TFRC), mRNA |  | 10 | 1.53 | 0.68 |
| A8K8Z4 | cDNA FLJ78071, highly similar to Human MHC class III complement component C6 mRNA |  | 1 | 0.78 | 0.39 |
| B2R5G8 | Serum amyloid A protein |  | 11 | 0.81 | 0.49 |
| B2R672 | Extracellular link domain containing 1 | XLKD1 | 5 | 1.54 | 0.23 |
| B2R6W1 | cDNA, FLJ93143, highly similar to Homo sapiens complement component 7 (C7), mRNA |  | 4 | 2.76 | 0.41 |
| B2R888 | Monocyte differentiation antigen CD14 |  | 13 | 1.45 | 0.15 |
| B2R983 | cDNA, FLJ94267, highly similar to Homo sapiens glutathione S-transferase omega 1 (GSTO1), mRNA |  | 2 | 0.61 | 0.57 |
| B2RC09 | cDNA, FLJ95794, highly similar to Homo sapiens apolipoprotein F (APOF), mRNA |  | 2 | 0.55 | 0.13 |
| B2RDL6 | cDNA, FLJ96669, highly similar to Homo sapiens secreted protein, acidic, cysteine-rich (osteonectin)(SPARC), mRNA |  | 5 | 1.23 | 0.34 |
| B2RMS9 | Inter-alpha (Globulin) inhibitor H4 (Plasma Kallikrein-sensitive glycoprotein) | ITIH4 | 81 | 0.95 | 0.68 |
| B2ZZ87 | Nedd4 binding protein 2 | N4BP2 | 1 | 1.48 | 0.43 |
| B3KN52 | cDNA FLJ13606 fis, clone PLACE1010579, highly similar to Homo sapiens GULP, engulfment adaptor PTB domain containing 1 (GULP1), mRNA |  | 2 | 0.56 | 0.31 |
| B3KUE5 | Phospholipid transfer protein, isoform CRA_c | PLTP | 8 | 1.24 | 0.38 |
| B4DHZ6 | Transferrin, isoform CRA_c | TF | 4 | 1.15 | 0.80 |
| B4DI57 | cDNA FLJ54111, highly similar to Serotransferrin |  | 3 | 1.39 | 0.17 |
| B4DN90 | cDNA FLJ53494, highly similar to Cartilage oligomeric matrix protein |  | 9 | 1.54 | 0.31 |
| B4DNG2 | cDNA FLJ59357, highly similar to Probable ATP-dependent RNA helicase DDX5 (EC 3.6.1.-) |  | 1 | 0.72 | 0.53 |
| B4DPP6 | cDNA FLJ54371, highly similar to Serum albumin |  | 1 | 5.03 | 0.34 |
| B4DPP8 | cDNA FLJ53075, highly similar to Kininogen-1 |  | 8 | 0.98 | 0.91 |
| B4DPQ3 | cDNA FLJ51034, highly similar to Vitamin K-dependent protein C (EC 3.4.21.69) |  | 9 | 0.98 | 0.85 |
| B4DPR2 | cDNA FLJ50830, highly similar to Serum albumin |  | 7 | 1.02 | 0.91 |
| B4DRF2 | cDNA FLJ58124, highly similar to Complement factor I (EC 3.4.21.45) |  | 1 | 1.01 | 0.97 |
| B4E1B2 | cDNA FLJ53691, highly similar to Serotransferrin |  | 7 | 1.43 | 0.53 |
| B4E1C2 | Kininogen 1, isoform CRA_b | KNG1 | 64 | 1.20 | 0.27 |
| B4E1S8 | cDNA FLJ59147, highly similar to Cysteine-rich secretory protein 3 |  | 1 | 0.65 | 0.15 |
| B4E1Z4 | cDNA FLJ55673, highly similar to Complement factor B (EC 3.4.21.47) |  | 114 | 1.23 | 0.08 |
| B4E2S7 | cDNA FLJ58780, highly similar to Homo sapiens lysosomal-associated membrane protein 2 (LAMP2), transcript variant LAMP2B, mRNA |  | 1 | 0.79 | 0.05 |
| B7Z1F8 | cDNA FLJ53025, highly similar to Complement C4-B |  | 5 | 0.62 | 0.18 |
| B7Z539 | cDNA FLJ56954, highly similar to Inter-alpha-trypsin inhibitor heavy chain H1 |  | 3 | 0.92 | 0.89 |
| B7Z549 | cDNA FLJ56821, highly similar to Inter-alpha-trypsin inhibitor heavy chain H1 |  | 76 | 0.76 | 0.08 |
| B7Z550 | Complement component 8, beta polypeptide, isoform CRA_b | C8B | 54 | **1.12** | **0.66** |
| B7Z8A2 | cDNA FLJ51671, highly similar to Prenylcysteine oxidase (EC 1.8.3.5) |  | 6 | 0.95 | 0.85 |
| B7Z8Q2 | cDNA FLJ55606, highly similar to Alpha-2-HS-glycoprotein |  | 26 | 1.38 | 0.09 |
| C0JYY2 | Apolipoprotein B (Including Ag(X) antigen), isoform CRA_a | APOB | 481 | 1.23 | 0.51 |
| C8C504 | Beta-globin | HBB | 1 | 0.53 | 0.44 |
| C9IZP8 | Complement C1s subcomponent (Fragment) | C1S | 1 | 0.91 | 0.81 |
| C9J6K0 | Secreted phosphoprotein 24 (Fragment) | SPP2 | 1 | 0.50 | 0.15 |
| C9J6L7 | Zinc finger transcription factor Trps1 (Fragment) | TRPS1 | 1 | 1.12 | 0.22 |
| C9JB55 | Serotransferrin (Fragment) | TF | 2 | 0.51 | 0.32 |
| C9JEE0 | Immunoglobulin lambda-like polypeptide 1 (Fragment) | IGLL1 | 1 | 0.75 | 0.56 |
| C9JF17 | Apolipoprotein D (Fragment) | APOD | 15 | 0.33 | 0.20 |
| D6RAR4 | Hepatocyte growth factor activator | HGFAC | 11 | 0.62 | 0.19 |
| D6RBA7 | Sorting nexin-14 (Fragment) | SNX14 | 2 | 1.86 | 0.08 |
| D9YZU5 | Beta-globin | HBB | 33 | 0.44 | 0.35 |
| D9ZGG2 | Vitronectin | VTN | 34 | 0.78 | 0.28 |
| E1B4S8 | Apolipoprotein B (Fragment) | APOB | 1 | 1.05 | 0.88 |
| E7EQ64 | Trypsin-1 | PRSS1 | 4 | 0.69 | 0.30 |
| E7ETH0 | Complement factor I | CFI | 37 | 0.91 | 0.74 |
| E9KL23 | Epididymis secretory sperm binding protein Li 44a | SERPINA1 | 93 | 1.36 | 0.12 |
| F2RM37 | Coagulation factor IX | F9 p22 | 10 | 0.57 | 0.30 |
| F6KPG5 | Albumin (Fragment) |  | 9 | 0.30 | 0.34 |
| F8VUB1 | Melanocyte protein PMEL | PMEL | 1 | 1.38 | 0.13 |
| G3V3A0 | Alpha-1-antichymotrypsin | SERPINA3 | 2 | 1.29 | 0.51 |
| G3XAK1 | Hepatocyte growth factor-like protein | MST1 | 18 | 1.22 | 0.53 |
| H0YAC1 | Plasma kallikrein (Fragment) | KLKB1 | 53 | 1.07 | 0.82 |
| H3BMD2 | Carnitine O-palmitoyltransferase 1, liver isoform | CPT1A | 1 | 0.77 | 0.17 |
| H3BTB7 | Probable glutamate--tRNA ligase, mitochondrial | EARS2 | 1 | 1.42 | 0.07 |
| H6VRF8 | Keratin 1 | KRT1 | 19 | 0.55 | 0.31 |
| H7C4M0 | Filamin A-interacting protein 1-like (Fragment) | FILIP1L | 1 | 0.54 | 0.28 |
| I3L145 | Sex hormone-binding globulin, isoform CRA_a | SHBG | 11 | 1.15 | 0.44 |
| K7EMZ7 | Uncharacterized protein C19orf57 | C19orf57 | 2 | 1.05 | 0.87 |
| L0R5A1 | Alternative protein CSF2RB | CSF2RB | 1 | 0.60 | 0.36 |
| L0R8D2 | Alternative protein RCOR1 | RCOR1 | 1 | 0.76 | 0.08 |
| M0QYB6 | Trimeric intracellular cation channel type A (Fragment) | TMEM38A | 2 | 0.50 | 0.45 |
| M0R009 | Alpha-1B-glycoprotein (Fragment) | A1BG | 2 | 0.73 | 0.20 |
| O00187 | Mannan-binding lectin serine protease 2 | MASP2 | 4 | 1.46 | 0.32 |
| O43173 | Sia-alpha-2,3-Gal-beta-1,4-GlcNAc-R:alpha 2,8-sialyltransferase | ST8SIA3 | 1 | 0.73 | 0.63 |
| O43263 | RNA editing deaminase 1 | hRED1 | 2 | 0.78 | 0.71 |
| O43866 | CD5 antigen-like | CD5L | 23 | 1.03 | 0.96 |
| O75636 | Ficolin-3 | FCN3 | 13 | 1.23 | 0.42 |
| O75882 | Attractin | ATRN | 25 | 0.83 | 0.75 |
| P00734 | Prothrombin | F2 | 63 | 0.70 | 0.09 |
| P00738 | Haptoglobin | HP | 74 | 0.38 | 0.10 |
| P00739 | Haptoglobin-related protein | HPR | 15 | 0.42 | 0.32 |
| P00747 | Plasminogen | PLG | 111 | 0.92 | 0.71 |
| P00748 | Coagulation factor XII | F12 | 30 | 1.31 | 0.36 |
| P01023 | Alpha-2-macroglobulin | A2M | 199 | 1.73 | 0.18 |
| P01024 | Complement C3 | C3 | 303 | 1.00 | 1.00 |
| P01031 | Complement C5 | C5 | 106 | 0.85 | 0.50 |
| P01591 | Immunoglobulin J chain | JCHAIN | 14 | 1.53 | 0.34 |
| P02652 | Apolipoprotein A-II | APOA2 | 15 | 0.57 | 0.09 |
| P02671 | Fibrinogen alpha chain | FGA | 43 | 1.33 | 0.08 |
| P02743 | Serum amyloid P-component | APCS | 15 | 0.70 | 0.05 |
| P02750 | Leucine-rich alpha-2-glycoprotein | LRG1 | 21 | 1.23 | 0.19 |
| P02753 | Retinol-binding protein 4 | RBP4 | 17 | 0.82 | 0.58 |
| P02760 | Protein AMBP | AMBP | 32 | 0.85 | 0.70 |
| P02763 | Alpha-1-acid glycoprotein 1 | ORM1 | 24 | 0.85 | 0.29 |
| P02768 | Serum albumin | ALB | 299 | 1.24 | 0.44 |
| P02774 | Vitamin D-binding protein | GC | 88 | 0.99 | 0.95 |
| P02775 | Platelet basic protein | PPBP | 9 | 1.03 | 0.87 |
| P02776 | Platelet factor 4 | PF4 | 7 | 4.58 | 0.37 |
| P02787 | Serotransferrin | TF | 207 | 1.21 | 0.51 |
| P02790 | Hemopexin | HPX | 67 | 0.84 | 0.50 |
| P03951 | Coagulation factor XI | F11 | 12 | 8.81 | 0.37 |
| P04003 | C4b-binding protein alpha chain | C4BPA | 53 | 1.24 | 0.13 |
| P04196 | Histidine-rich glycoprotein | HRG | 40 | 0.77 | 0.29 |
| P04217 | Alpha-1B-glycoprotein | A1BG | 33 | 0.89 | 0.71 |
| P05109 | Protein S100-A8 | S100A8 | 4 | 1.08 | 0.93 |
| P05160 | Coagulation factor XIII B chain | F13B | 11 | 0.87 | 0.69 |
| P05546 | Heparin cofactor 2 | SERPIND1 | 40 | **0.80** | **0.06** |
| P06727 | Apolipoprotein A-IV | APOA4 | 85 | 0.98 | 0.83 |
| P07357 | Complement component C8 alpha chain | C8A | 37 | 1.01 | 0.96 |
| P07360 | Complement component C8 gamma chain | C8G | 16 | 1.35 | 0.24 |
| P08519 | Apolipoprotein(a) | LPA | 17 | 0.83 | 0.13 |
| P08697 | Alpha-2-antiplasmin | SERPINF2 | 38 | 0.96 | 0.75 |
| P09172 | Dopamine beta-hydroxylase | DBH | 3 | 1.15 | 0.68 |
| P09871 | Complement C1s subcomponent | C1S | 43 | 0.79 | 0.12 |
| P0C0L4 | Complement C4-A | C4A | 196 | 0.92 | 0.67 |
| P0C0L5 | Complement C4-B | C4B | 11 | 0.87 | 0.56 |
| P0DJI8 | Serum amyloid A-1 protein | SAA1 | 10 | 2.83 | 0.38 |
| P0DOX2 | Immunoglobulin alpha-2 heavy chain |  | 4 | 1.82 | 0.45 |
| P0DOX3 | Immunoglobulin delta heavy chain |  | 16 | 3.38 | 0.14 |
| P0DOX6 | Immunoglobulin mu heavy chain |  | 36 | 1.11 | 0.85 |
| P0DOX7 | Immunoglobulin kappa light chain |  | 3 | 0.58 | 0.54 |
| P0DOX8 | Immunoglobulin lambda-1 light chain |  | 10 | 0.75 | 0.31 |
| P10643 | Complement component C7 | C7 | 69 | 2.05 | 0.20 |
| P11226 | Mannose-binding protein C | MBL2 | 6 | 1.03 | 0.96 |
| P13671 | Complement component C6 | C6 | 55 | 0.96 | 0.92 |
| P15169 | Carboxypeptidase N catalytic chain | CPN1 | 15 | 0.70 | 0.39 |
| P15814 | Immunoglobulin lambda-like polypeptide 1 | IGLL1 | 5 | 1.90 | 0.11 |
| P18428 | Lipopolysaccharide-binding protein | LBP | 9 | 1.53 | 0.08 |
| P19652 | Alpha-1-acid glycoprotein 2 | ORM2 | 14 | 0.66 | 0.08 |
| P20851 | C4b-binding protein beta chain | C4BPB | 10 | 0.76 | 0.31 |
| P22792 | Carboxypeptidase N subunit 2 | CPN2 | 20 | 0.87 | 0.47 |
| P23142 | Fibulin-1 | FBLN1 | 32 | 1.74 | 0.09 |
| P27169 | Serum paraoxonase/arylesterase 1 | PON1 | 19 | 1.11 | 0.58 |
| P33151 | Cadherin-5 | CDH5 | 7 | 0.56 | 0.39 |
| P33908 | Mannosyl-oligosaccharide 1,2-alpha-mannosidase IA | MAN1A1 | 3 | 10.21 | 0.20 |
| P35542 | Serum amyloid A-4 protein | SAA4 | 2 | 1.14 | 0.44 |
| P35858 | Insulin-like growth factor-binding protein complex acid labile subunit | IGFALS | 23 | 0.76 | 0.34 |
| P40197 | Platelet glycoprotein V | GP5 | 7 | 0.98 | 0.88 |
| P43652 | Afamin | AFM | 73 | 0.84 | 0.83 |
| P48740 | Mannan-binding lectin serine protease 1 | MASP1 | 7 | **0.76** | **0.51** |
| P55056 | Apolipoprotein C-IV | APOC4 | 8 | 0.60 | 0.13 |
| P60709 | Actin, cytoplasmic 1 | ACTB | 22 | 1.29 | 0.35 |
| P62913 | 60S ribosomal protein L11 | RPL11 | 2 | 1.09 | 0.79 |
| P80108 | Phosphatidylinositol-glycan-specific phospholipase D | GPLD1 | 20 | 1.16 | 0.52 |
| Q03591 | Complement factor H-related protein 1 | CFHR1 | 8 | 0.65 | 0.45 |
| Q06033 | Inter-alpha-trypsin inhibitor heavy chain H3 | ITIH3 | 42 | 1.15 | 0.33 |
| Q0KKI6 | Immunoblobulin light chain (Fragment) |  | 29 | 0.72 | 0.49 |
| Q0ZCH0 | Immunglobulin heavy chain variable region (Fragment) |  | 1 | 1.03 | 0.82 |
| Q0ZCH4 | Immunglobulin heavy chain variable region (Fragment) |  | 1 | 0.04 | 0.37 |
| Q0ZCI8 | Immunglobulin heavy chain variable region (Fragment) |  | 1 | 0.93 | 0.93 |
| Q14520 | Hyaluronan-binding protein 2 | HABP2 | 19 | 0.91 | 0.66 |
| Q53GY3 | Angiotensinogen variant (Fragment) |  | 30 | 0.85 | 0.55 |
| Q569I7 | Uncharacterized protein |  | 1 | 0.43 | 0.37 |
| Q56G89 | Serum albumin |  | 3 | 2.33 | 0.15 |
| Q59F51 | PREDICTED: F-box protein 10 variant (Fragment) |  | 1 | 0.33 | 0.49 |
| Q5CZ94 | Uncharacterized protein DKFZp781M0386 | DKFZp781M0386 | 1 | 0.58 | 0.44 |
| Q5FWF9 | IGL@ protein | IGL@ | 9 | 1.01 | 0.96 |
| Q5T7N2 | LINE-1 type transposase domain-containing protein 1 | L1TD1 | 2 | 1.19 | 0.39 |
| Q5TDH0 | Protein DDI1 homolog 2 | DDI2 | 1 | 0.57 | 0.19 |
| Q65ZC9 | Single-chain Fv (Fragment) | scFv | 1 | 2.71 | 0.51 |
| Q68DL7 | Uncharacterized protein C18orf63 | C18orf63 | 2 | 0.91 | 0.87 |
| Q68DR3 | Uncharacterized protein DKFZp779H1622 (Fragment) | DKFZp779H1622 | 3 | 0.49 | 0.26 |
| Q6EMK4 | Vasorin | VASN | 8 | 0.99 | 0.99 |
| Q6IPQ0 | IGL@ protein | IGL@ | 1 | 1.07 | 0.61 |
| Q6LAM1 | Heavy chain of factor I (Fragment) |  | 4 | 0.99 | 0.99 |
| Q6LDC6 | Vitamin D binding protein protein (Fragment) | vitamin D binding protein | 3 | 1.12 | 0.90 |
| Q6MZL2 | Uncharacterized protein DKFZp686M0562 (Fragment) | DKFZp686M0562 | 5 | 1.88 | 0.43 |
| Q6MZQ6 | Uncharacterized protein DKFZp686G11190 | DKFZp686G11190 | 3 | 1.08 | 0.76 |
| Q6MZW0 | Uncharacterized protein DKFZp686J11235 (Fragment) | DKFZp686J11235 | 2 | 1.40 | 0.34 |
| Q6MZX7 | Uncharacterized protein DKFZp686M24218 | DKFZp686M24218 | 22 | 1.12 | 0.77 |
| Q6N041 | Uncharacterized protein DKFZp686O16217 (Fragment) | DKFZp686O16217 | 8 | 0.54 | 0.57 |
| Q6N091 | Uncharacterized protein DKFZp686C02220 (Fragment) | DKFZp686C02220 | 2 | 1.58 | 0.15 |
| Q6N093 | Uncharacterized protein DKFZp686I04196 (Fragment) | DKFZp686I04196 | 3 | 0.81 | 0.38 |
| Q6N095 | Uncharacterized protein | DKFZp686K03196 | 15 | 0.78 | 0.71 |
| Q6PIK1 | IGL@ protein | IGL@ | 4 | 0.55 | 0.25 |
| Q6UXB8 | Peptidase inhibitor 16 | PI16 | 4 | 1.14 | 0.43 |
| Q6ZVM5 | cDNA FLJ42083 fis, clone TCERX2000613 |  | 1 | 0.02 | 0.17 |
| Q6ZVX0 | cDNA FLJ41981 fis, clone SMINT2011888, highly similar to Protein Tro alpha1 H,myeloma |  | 1 | 0.66 | 0.33 |
| Q6ZW64 | cDNA FLJ41552 fis, clone COLON2004478, highly similar to Protein Tro alpha1 H,myeloma |  | 7 | 0.58 | 0.31 |
| Q7Z351 | Uncharacterized protein DKFZp686N02209 | DKFZp686N02209 | 2 | 1.50 | 0.47 |
| Q86YA3 | Protein ZGRF1 | ZGRF1 | 2 | 0.77 | 0.75 |
| Q8N355 | IGL@ protein | IGL@ | 25 | 1.00 | 0.99 |
| Q8NCL6 | cDNA FLJ90170 fis, clone MAMMA1000370, highly similar to Ig alpha-1 chain C region |  | 15 | 0.79 | 0.38 |
| Q8NEJ1 | Uncharacterized protein |  | 2 | 0.62 | 0.61 |
| Q96DK0 | cDNA FLJ25298 fis, clone STM07683, highly similar to Protein Tro alpha1 H,myeloma |  | 1 | 0.82 | 0.50 |
| Q96PD5 | N-acetylmuramoyl-L-alanine amidase | PGLYRP2 | 31 | 0.97 | 0.91 |
| Q9BSD2 | C21orf105 protein (Fragment) | C21orf105 | 1 | 1.02 | 0.95 |
| Q9NPP6 | Immunoglobulin heavy chain variant (Fragment) |  | 37 | 0.92 | 0.84 |
| Q9NYQ8 | Protocadherin Fat 2 | FAT2 | 3 | 0.99 | 0.98 |
| Q9NZP8 | Complement C1r subcomponent-like protein | C1RL | 7 | 0.54 | 0.05 |
| Q9UGM5 | Fetuin-B | FETUB | 8 | 0.95 | 0.73 |
| Q9UL84 | Myosin-reactive immunoglobulin heavy chain variable region (Fragment) |  | 4 | 2.95 | 0.34 |
| Q9UL89 | Myosin-reactive immunoglobulin heavy chain variable region (Fragment) |  | 6 | 0.99 | 0.99 |
| Q9UL92 | Myosin-reactive immunoglobulin heavy chain variable region (Fragment) |  | 2 | 0.76 | 0.65 |
| Q9UNU2 | Complement protein C4B frameshift mutant (Fragment) | C4B | 4 | 1.08 | 0.83 |
| S6AWE6 | IgG L chain |  | 5 | 0.92 | 0.56 |
| S6BAR0 | IgG L chain |  | 2 | 0.03 | 0.10 |
| S6BGD6 | IgG L chain |  | 2 | 1.04 | 0.89 |
| S6BGE0 | IgG H chain |  | 4 | 0.44 | 0.43 |
| S6BGE9 | IgG L chain |  | 2 | 0.96 | 0.96 |
| S6C4R2 | IgG H chain |  | 1 | 0.41 | 0.30 |
| S6C4R7 | IgG L chain |  | 3 | 1.24 | 0.67 |
| V9H1D9 | Alpha globin |  | 3 | 0.21 | 0.20 |
| V9HW68 | Epididymis luminal protein 214 | HEL-214 | 72 | 1.21 | 0.46 |
| X6R413 | Zinc finger protein-interacting with ribonucleoprotein K | ZIK1 | 1 | 1.33 | 0.52 |

Notes: Red labeling indicates the upregulated proteins with at least 1.5-fold and green labeling indicates the downregulated proteins with at least 1.5-fold.
